# Supplementary material for: High-throughput continuous evolution of compact Cas9 variants targeting single-nucleotide-pyrimidine PAMs
Source: PubMed Central journal article supplement (PMC9849140; doi:10.1038/s41587-022-01410-2), 2022-09-08
Supplement: 41587_2022_1410_MOESM1_ESM.pdf [file 41587_2022_1410_MOESM1_ESM.pdf]

---

**Supplementary information**

---

**High-throughput continuous evolution of compact Cas9 variants targeting single-nucleotide-pyrimidine PAMs**

---

In the format provided by the authors and unedited

## Supplementary Information

### **High-throughput continuous evolution of compact Cas9 variants targeting single-nucleotide-pyrimidine PAMs**

Tony P. Huang<sup>1,2,3,8</sup>, Zachary J. Heins<sup>4,5,8</sup>, Shannon M. Miller<sup>1,2,3</sup>, Brandon G. Wong<sup>4,5</sup>, Pallavi A. Balivada<sup>4,5</sup>, Tina Wang<sup>1,2,3,7</sup>, Ahmad S. Khalil<sup>4,5,6\*</sup> and David R. Liu<sup>1,2,3,\*</sup>

<sup>1</sup>Merkin Institute of Transformative Technologies in Healthcare, The Broad Institute of Harvard and MIT, Cambridge, MA, USA

<sup>2</sup>Department of Chemistry and Chemical Biology, Harvard University, Cambridge, MA, USA

<sup>3</sup>Howard Hughes Medical Institute, Harvard University, Cambridge, MA, USA

<sup>4</sup>Biological Design Center, Boston University, Boston, MA, USA

<sup>5</sup>Department of Biomedical Engineering, Boston University, Boston, MA, USA

<sup>6</sup>Wyss Institute for Biologically Inspired Engineering, Harvard University, Boston, MA, USA

<sup>7</sup>Department of Chemistry, University of Wisconsin-Madison, Madison, WI, USA

<sup>8</sup>These authors contributed equally

\*Corresponding authors

## Supplementary Figures

1. High level description of ePACE components.
2. Integrated Peristaltic Pump (IPP) characterization.
3. eVOLVER pressure regulator characterization.
4. ePACE validation on two-hybrid Maltose Binding Protein (MBP).
5. Flow rate schedule and titers for ePACE1.
6. Mutation table and representative activity of ePACE1 evolved Nme2Cas9 variants.
7. Flow rate schedule and titers for ePACE2.
8. Identification of ePACE2 selection cheating.
9. Source gels for Supplementary Figure 8
10. Mutation table and representative activity of ePACE2 evolved Nme2Cas9 variants.
11. Validation of the split SAC-PACE selection with different TadABE8e variants.
12. Flow rate schedule and titers for ePACE3.
13. Mutation table and representative activity of ePACE3 evolved Nme2Cas9 variants.
14. PANCE dilution schedule and titers for N1.
15. Flow rate schedule and titers for ePACE4.
16. PANCE dilution schedule and titers for N2.
17. Flow rate schedule and titers for ePACE5.
18. eNme2-T.1-ABE8e and eNme2-T.2-ABE8e activity at N<sub>4</sub>VN PAM sites.
19. *In silico* prediction of off-target sites with  $\leq 3$  mismatches for a 20-nt or 23-nt protospacer.
20. High-throughput sequencing validation of GUIDE-seq-identified off-target activity.
21. Off-target adenine base editing at *in silico*-predicted off-target sites for SpRY-ABE8e, SpRY-HF1-ABE8e, eNme2-T.1-ABE8e and eNme2-T.2-ABE8e.
22. Dose-dependent adenine base editing activity in primary human dermal fibroblasts.
23. Off-target adenine base editing at *in silico*-predicted off-target sites for SpCas9-NRCH and eNme2-C sgRNAs targeting the *HBB* sickle-cell disease mutation.

## Supplementary Tables

1. BE-PPA library editing data.
2. CHOPCHOPv3-identified off-target sites of protospacer-matched sgRNAs comparing eNme2-C to SpRY and SpRY-HF1.
3. GUIDE-Seq identified off-target sites.
4. CHOPCHOPv3-identified off-target sites of protospacer-matched sgRNAs comparing eNme2-T.1 and eNme2-T.2 to SpRY and SpRY-HF1.
5. List of target sites.
6. CHOPCHOPv3-identified off-target sites of sgRNAs targeting the *HBB* sickle-cell disease mutation.
7. Plasmids and selection phage (SP) used in this work.
8. Primers used in this work.
9. Chemically-synthesized guide RNAs used for HDFa cells.

## Supplementary Notes

1. ePACE pressure regulation.
2. ePACE2 recombination and cheating.
3. Validation of the split base editor SAC-PACE selection.
4. PAM-specific activity of ePACE4 evolved variants observed in ABE-PPA.
5. Reversion analysis of eNme2-C RuvC/HNH domain mutations.
6. Analysis and limitations of BE-PPA for evaluating Nme2Cas9 PAM compatibility.
7. Design error for the N<sub>4</sub>CN trajectory dual PAM split SAC-PACE APs.
8. Evolved Nme2Cas9 amino acid sequences.

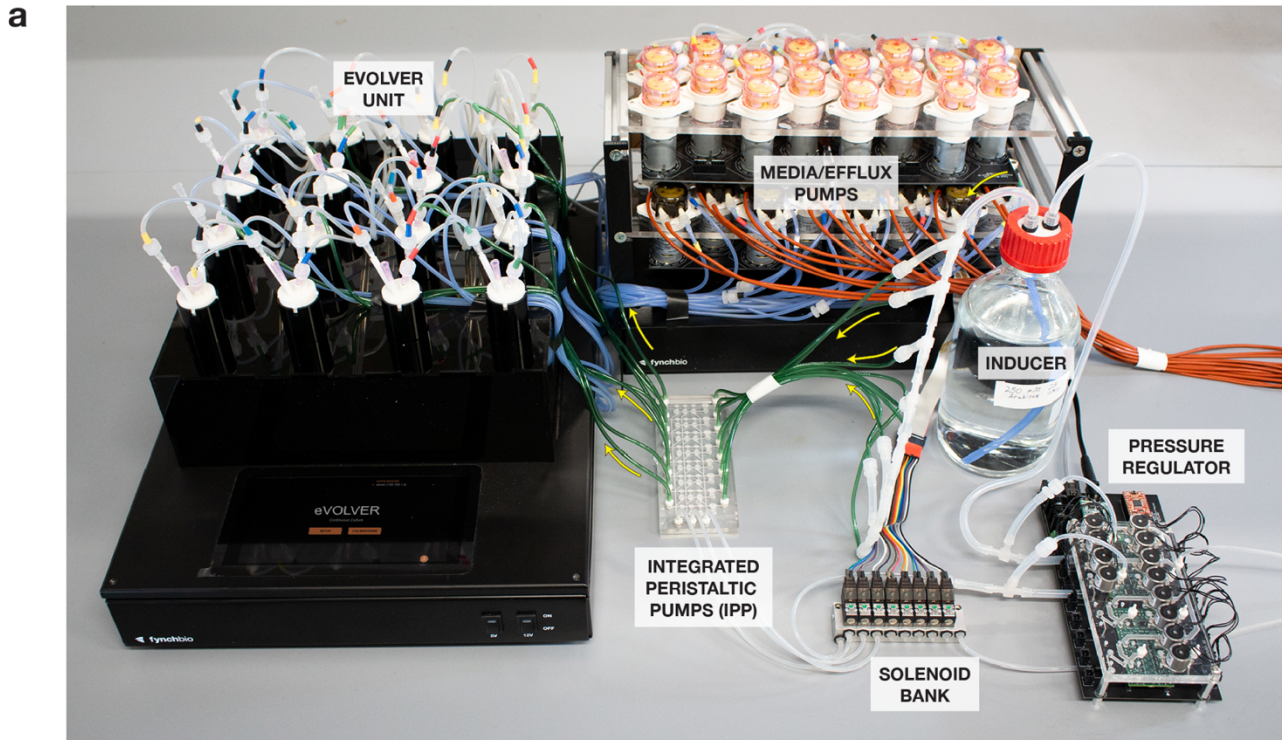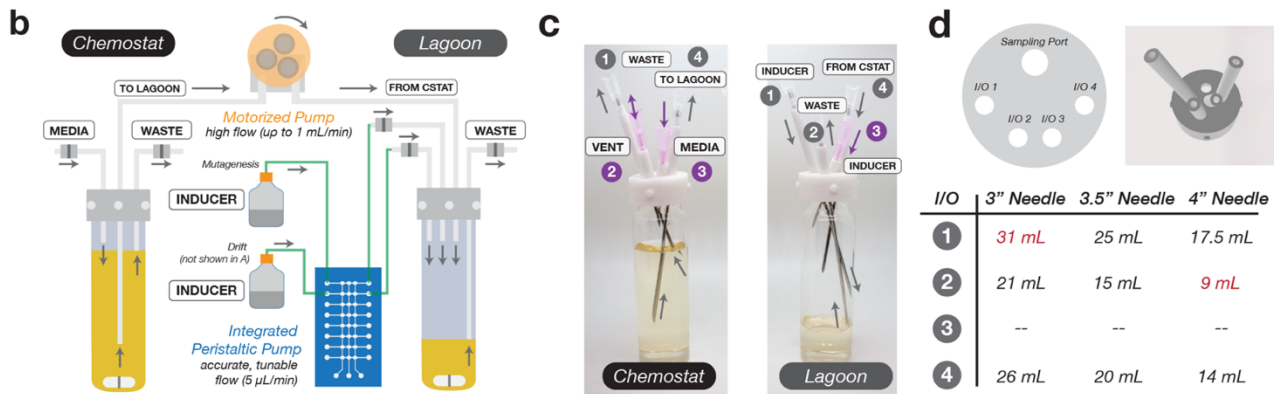

**Supplementary Figure 1. High level description of ePACE components. (a)** Photograph of ePACE, consisting of an eVOLVER continuous culture unit with custom vial caps, fluidics unit with a set of slow (~1 ml/m, pink pump heads) and fast (~1 ml/s, black pump heads) pump arrays for vial-to-vial/media pumping and waste pumping respectively, IPP device for chemical inducer pumping (~0.5  $\mu$ l/s), and a multi-channel pressure regulator for powering IPP devices and pressurizing inducer bottles. **(b)** Diagram of fluidics for a single ePACE chemostat/lagoon pair. **(c)** Photograph of custom vials and caps designed for ePACE, labeled for a typical setup. Caps are designed to be used with hypodermic needles, but can also be used with other types of tubing if desired. **(d)** Diagram of volume levels for each input/output (I/O) port on the caps with different length needles. In ePACE, the efflux needle is set to 31 ml and 9 ml for the chemostat and lagoon, respectively (highlighted in red).

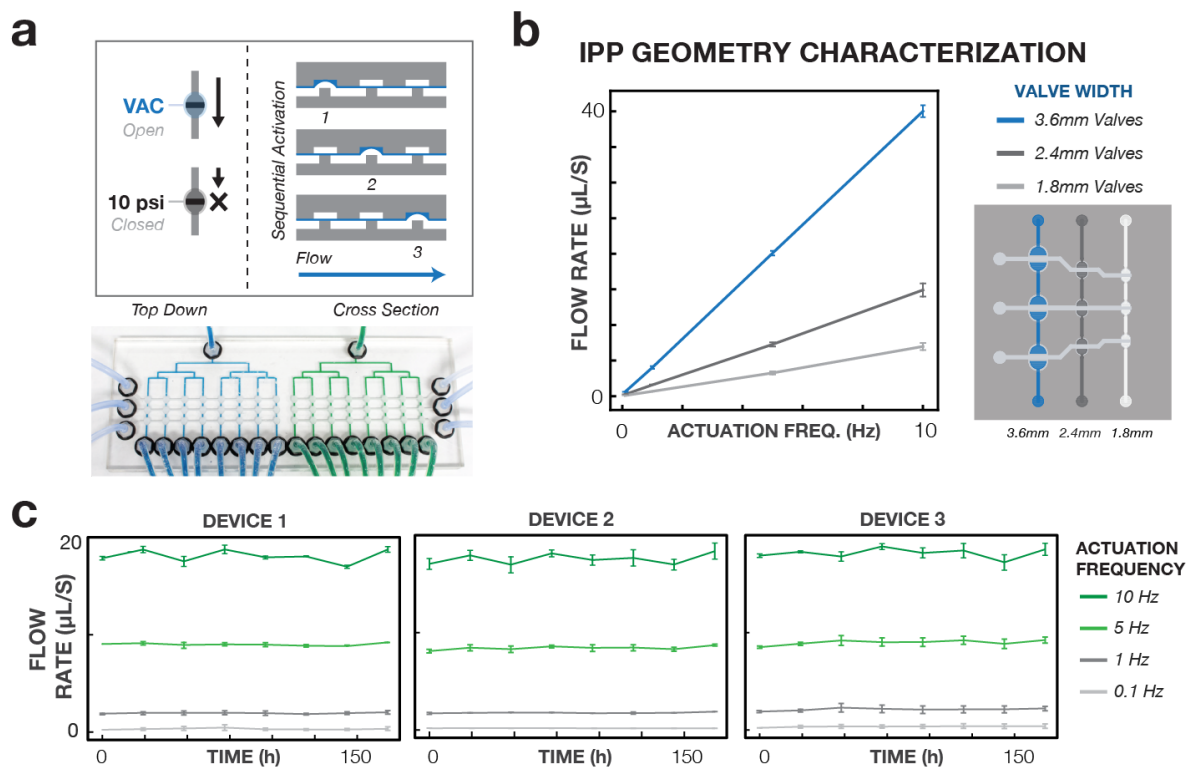

### Supplementary Figure 2. Integrated Peristaltic Pump (IPP) characterization.

**(a)** Diagram of IPP functionality. Three valves in series are sequentially opened and closed to induce a peristaltic effect on the flow line. A single set of control lines can be used to pump many channels in parallel. **(b)** Valve geometry effects on achievable flow rates. Error bars represent the standard deviation over three measurements on a single channel of a single device. **(c)** Three IPP devices, each with three parallel channels with linked control lines, were run continuously for 168 hours at 10 Hz. Every 24 hours, the devices were briefly stopped and flow rate measurements were taken across the device performance range at 10 Hz, 5 Hz, 1 Hz, and 0.1 Hz. Devices were then restarted at 10 Hz immediately after measurements were taken. For **b** and **c**, data are presented as mean $\pm$ SD of  $n=3$  independent technical replicates.

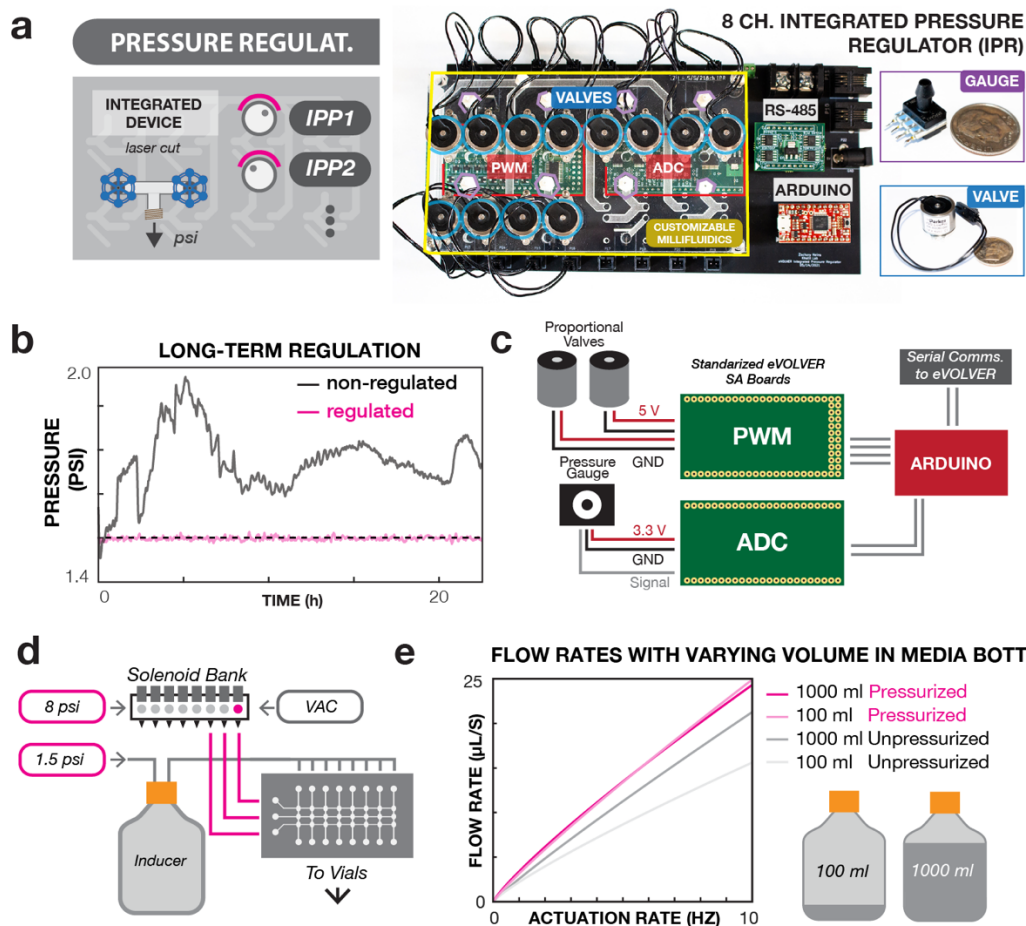

**Supplementary Figure 3. eVOLVER pressure regulator characterization. (a)** Diagram and photo of an 8-channel PID controlled pressure regulator. **(b)** Comparison of pressures over 24 hours of PID controlled pressure to a manually set valve, both initial set at 1.5 psi. **(c)** Simplified electrical schematic of eVOLVER pressure regulator. Each proportional valve is controlled via pulse-width modulation (PWM) using a standard eVOLVER PWM board. A single PWM board can control 16 valves simultaneously, enabling control of eight individual pressure lines. Electrical pressure gauge readouts are connected to a standard eVOLVER analog-to-digital (ADC) converter. Both PWM and ADC boards are connected to a SAMD21 Arduino microcontroller which controls valve open/closeness and reads data from the gauges. The microcontroller receives commands from and sends data to the eVOLVER via serial communication protocol. **(d)** Schematic of pressure regulation for ePACE. The IPP devices are powered by 8 psi provided by the pressure regulator and standard lab bench vacuum. Inducer bottles receive 1.5 psi. **(e)** Comparison of flow rates between media bottles with varying volumes of media while pressurized and un-pressurized.

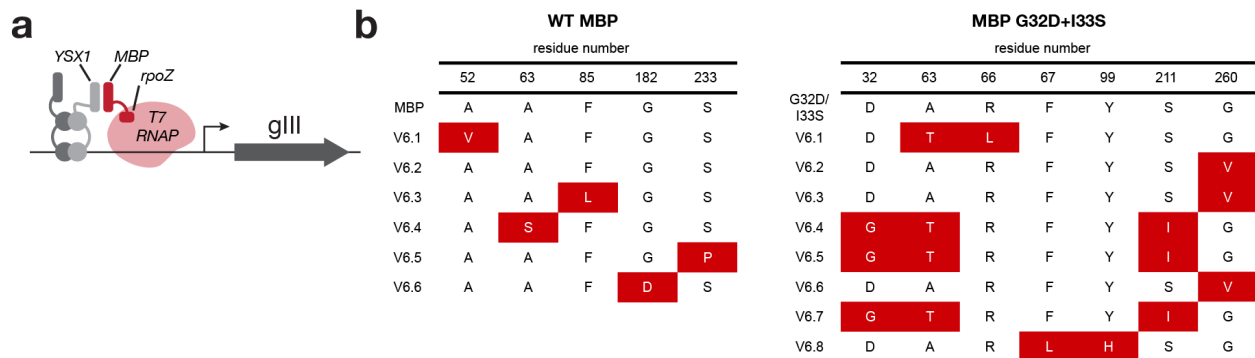

**Supplementary Figure 4. ePACE validation on two-hybrid Maltose Binding Protein (MBP) selection.** (a) Diagram of two-hybrid MBP selection. Upon proper folding of MBP, a T7 RNA Polymerase is recruited to transcribe *gIII*. (b) Mutation tables of negative control WT MBP and structurally defective MBP after 120 hours of ePACE. MBP G32+I33S shows converging mutations at residues clustered around the monobody-MBP interaction interface (D32G, A63T, R66L), previously observed in PACE<sup>1</sup>.



## NNNCTN PAMs

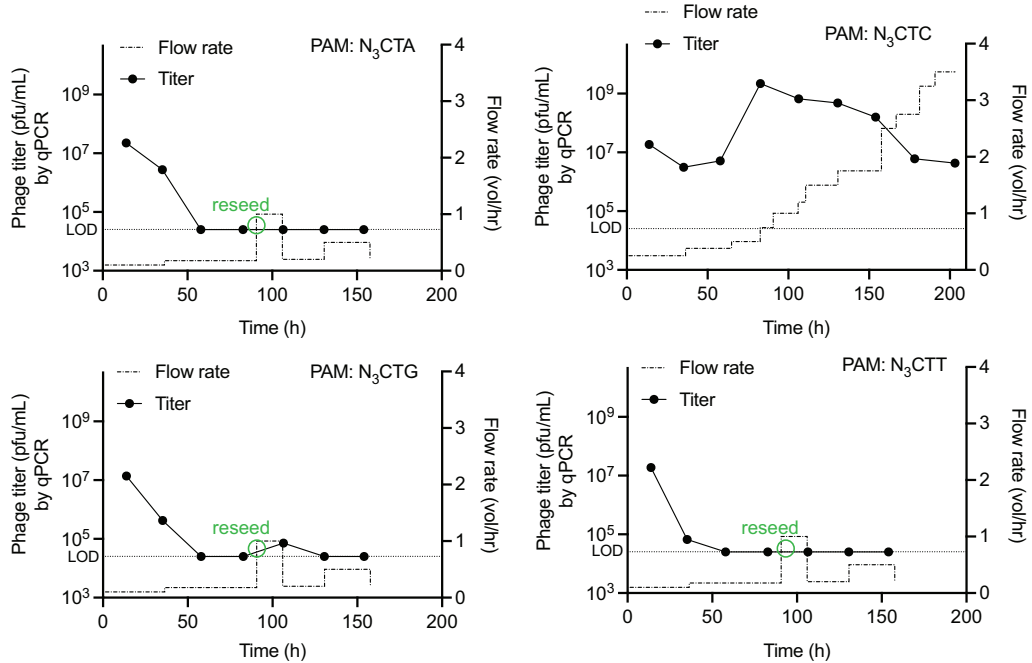

## NNNTTN PAMs

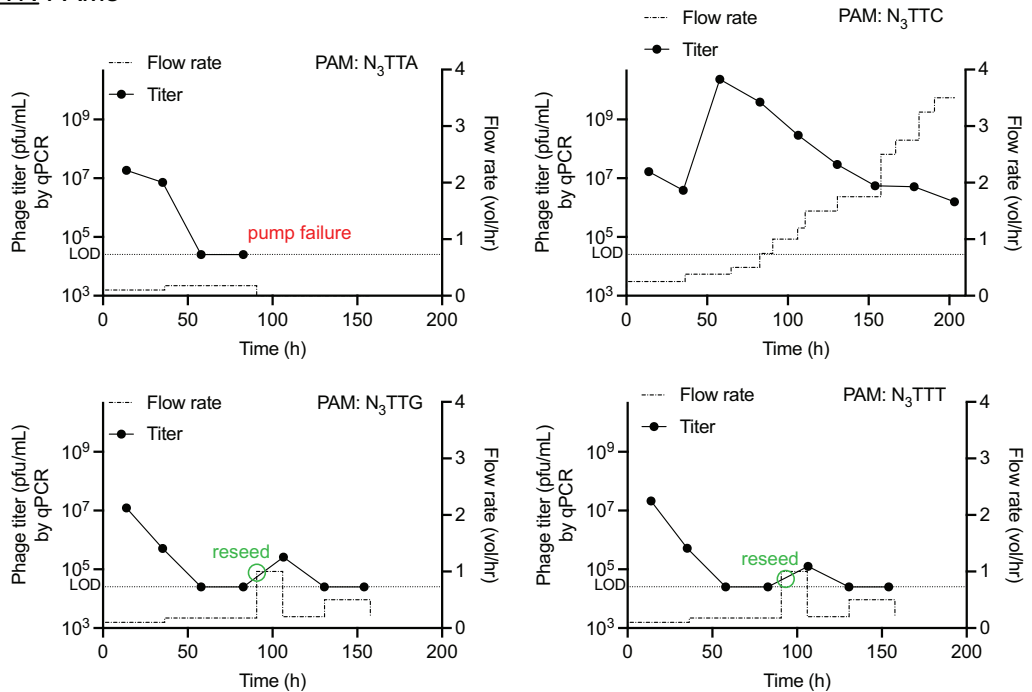

**Supplementary Figure 5. Flow rate schedule and titers for ePACE1.** SP containing wild-type, full-length Nme2ABE8e were first diversified in *E. coli* host cells containing pJC175e<sup>2</sup> and MP6<sup>2</sup>, isolated, then seeded into ePACE1 (eight chemostats, one lagoon each targeting each of the eight N<sub>3</sub>YTN PAMs). Flow rate stringency for each PAM is shown in the plots, as are resulting titers (measured by qPCR). If lagoons were reseeded with starting phage, the timepoint is highlighted in a green circle. The N<sub>3</sub>TTA lagoon failed prematurely due to a pump failure in the ePACE setup. LOD=limit of detection of qPCR titering, as set by the titer corresponding to the C<sub>q</sub> for which the qPCR primers alone had been observed to amplify.

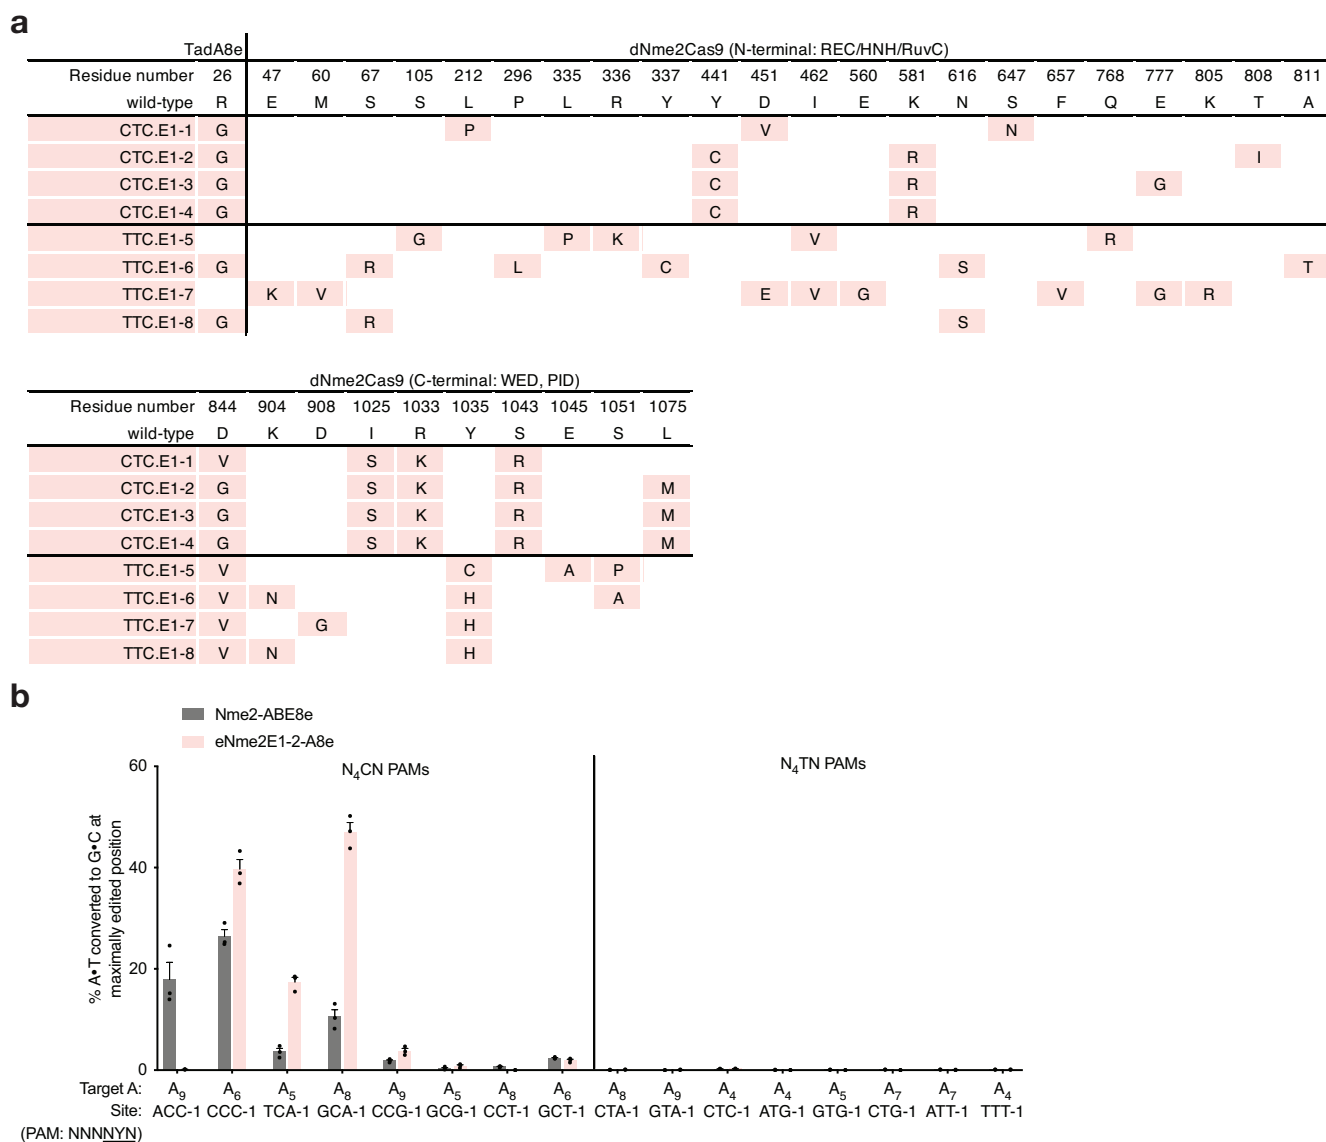

**Supplementary Figure 6. Mutation table and representative activity of ePACE1 evolved Nme2Cas9 variants. (a)** Genotypes of individually sequenced plaques following ePACE1, with positions varying from wild-type displayed. Clones evolved on different PAMs are delineated by a bold line. **(b)** Adenine base editing activity of a representative ePACE1 clone (E1-2-ABE8e) at eight N<sub>3</sub>NCN PAM-containing sites and eight N<sub>4</sub>TN PAM-containing sites in HEK293T cells. Mean±SEM are shown and are representative of *n*=3 independent biological replicates.

### NNNCTN PAMs

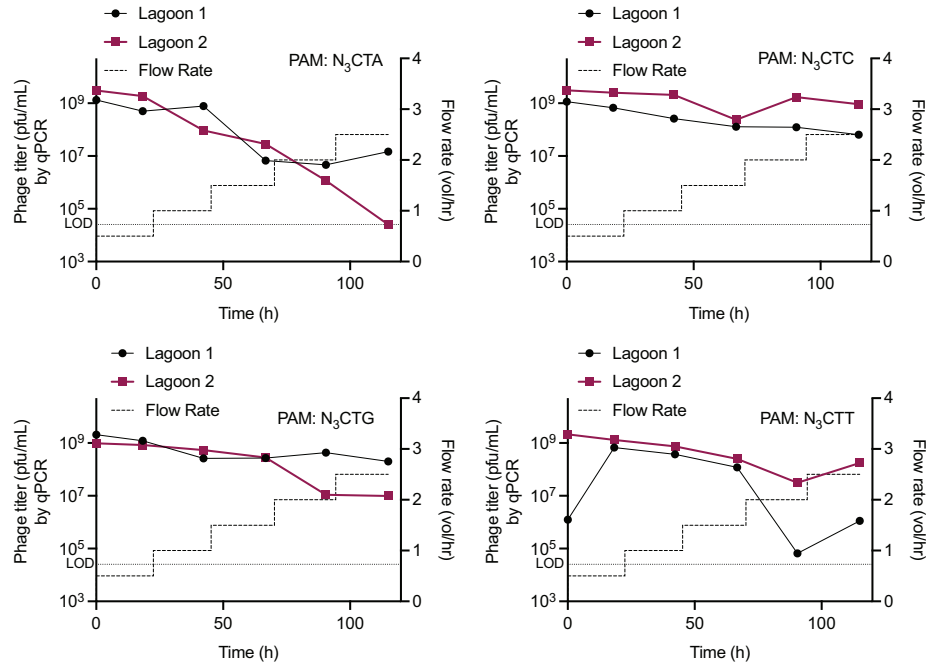

### NNNTTN PAMs

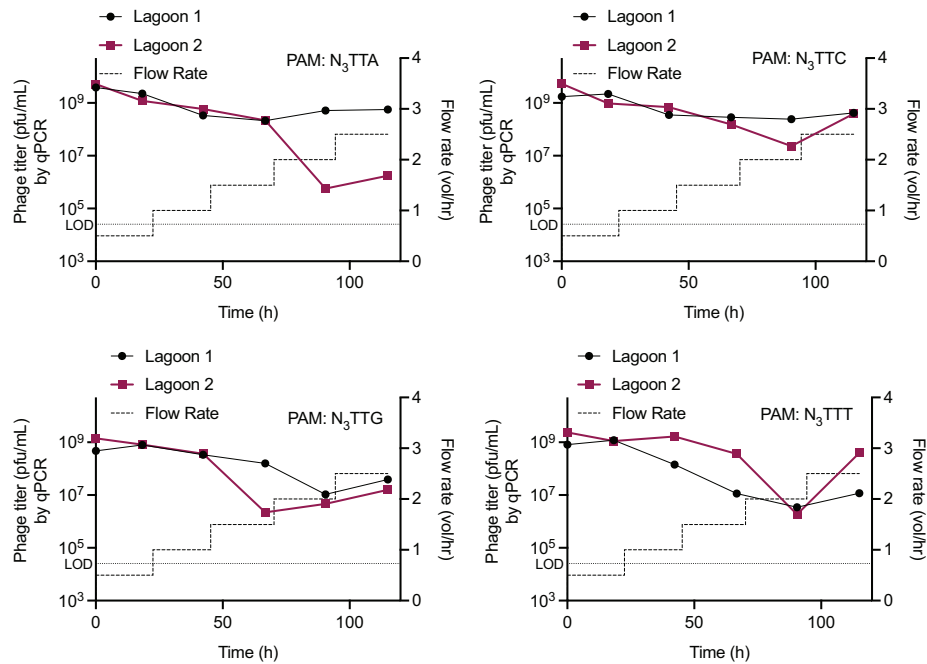

**Supplementary Figure 7. Flow rate schedule and titers for ePACE2.** SP previously isolated from ePACE1 lagoons evolved on N<sub>3</sub>TTC and N<sub>3</sub>CTC PAMs were pooled and reseeded into ePACE2 (eight chemostats, two lagoons each targeting each of the eight N<sub>3</sub>YTN PAMs). Flow rate stringency for each PAM is shown in the plots, as are resulting titers (measured by qPCR). LOD=limit of detection of qPCR titering, as set by the titer corresponding to the C<sub>q</sub> for which the qPCR primers alone had been observed to amplify.

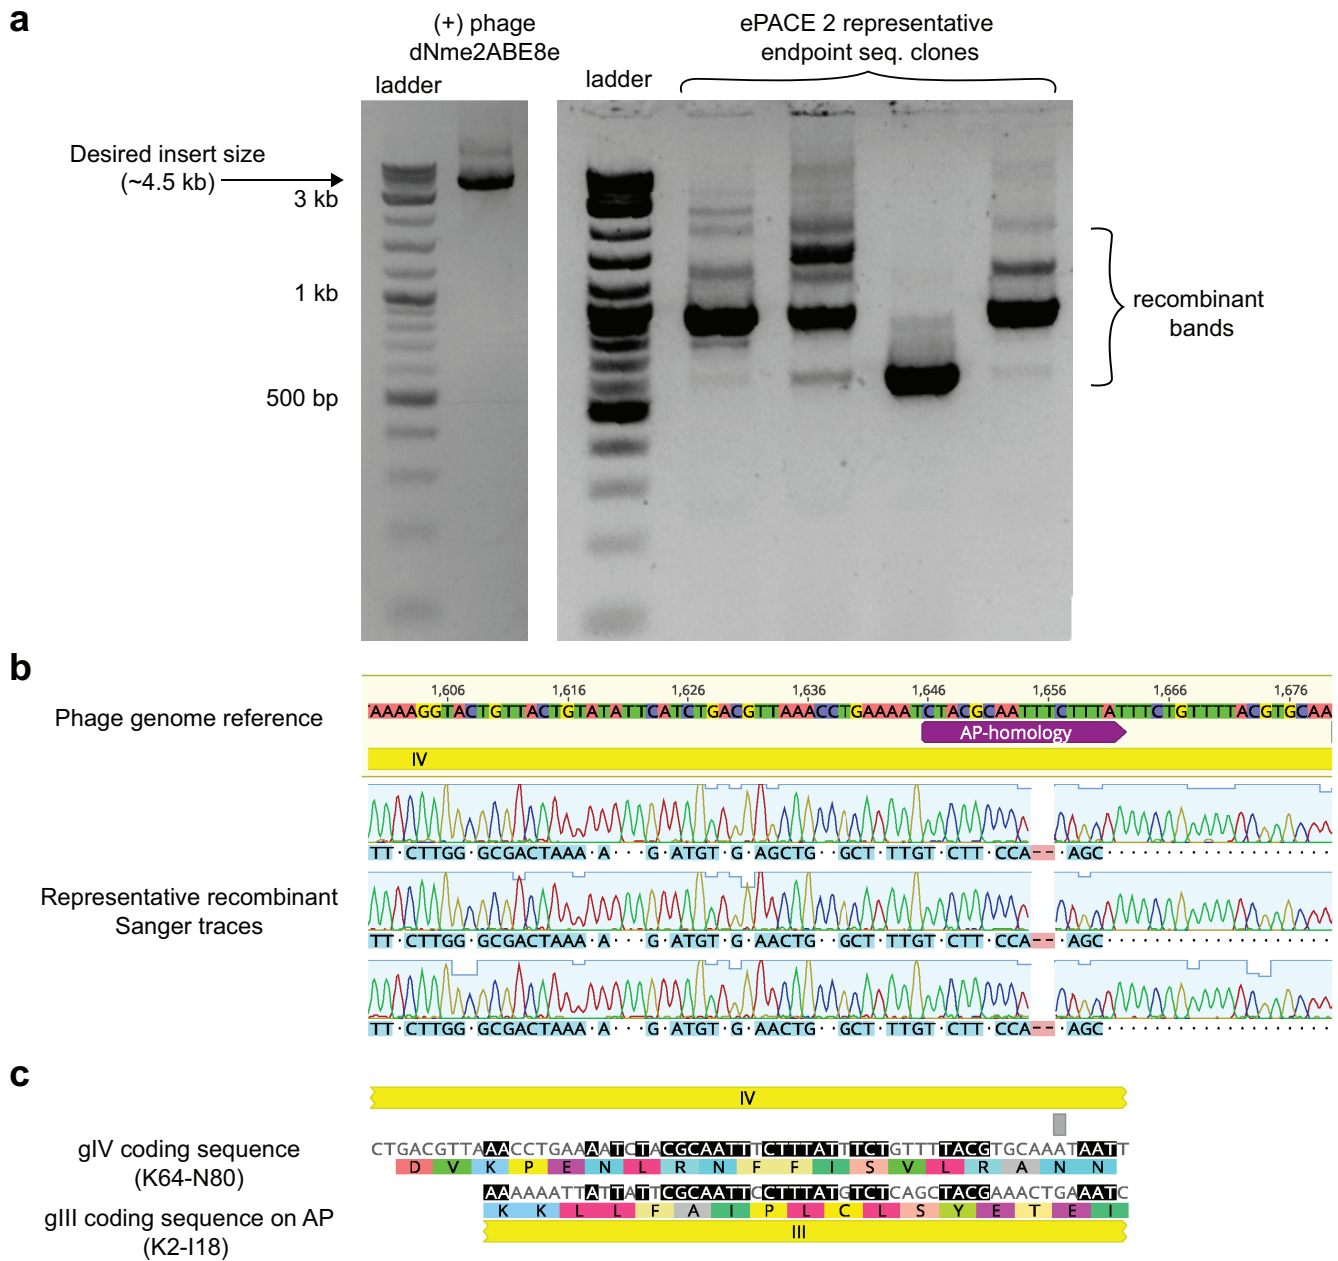

**Supplementary Figure 8. Identification of ePACE2 selection cheating.** (a) Representative agarose gel of PCR products amplifying the target insert from individual ePACE2 late timepoint SP plaques. The expected insert size for Nme2ABE8e is ~4.5 kb (left, starting SP), whereas multiple recombinant bands appeared for ePACE2 evolved SP (right). The gels were not repeated ( $n=1$ ). (b) Sanger sequencing partially mapping the recombinant bands from (a) onto the gVI coding sequence, the unaligned sequence to the left maps to the gIII-containing AP sequence. (c) Nucleotide sequence homology between the coding sequence of gIV (where recombination was seen) and the gIII coding sequence present on the AP, aligned nucleotides highlighted in black.

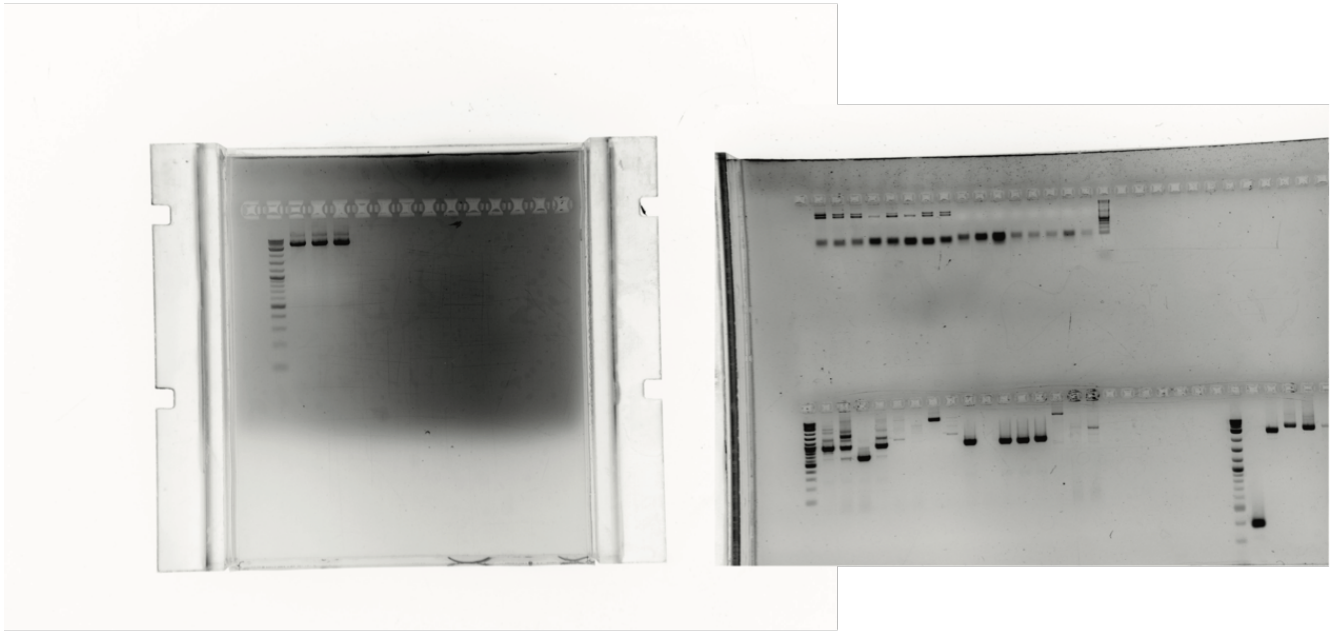

**Supplementary Figure 9. Source gels for Supplementary Figure 8.** Uncropped gels that were used to generate Supplementary Figure 8a. The two gels were taken at separate times, but contain the same ladder for reference. The right gel was cropped to remove lanes from unrelated experiments.

**a**

| TadA8e         |    |    |    |    |     |     |     |     |   | dNme2Cas9 (N-terminal: REC/HNH/RuvC) |    |    |    |     |     |     |     |     |     |     |     |     |     |     |     |   |   |
|----------------|----|----|----|----|-----|-----|-----|-----|---|--------------------------------------|----|----|----|-----|-----|-----|-----|-----|-----|-----|-----|-----|-----|-----|-----|---|---|
| Residue number | 26 | 49 | 53 | 71 | 102 | 124 | 156 | 163 | 2 | 47                                   | 53 | 68 | 94 | 119 | 123 | 154 | 186 | 323 | 340 | 361 | 396 | 409 | 424 | 431 | 441 |   |   |
| wild-type      | R  | A  | H  | M  | R   | Y   | V   | A   | A | E                                    | K  | V  | A  | D   | T   | E   | E   | L   | D   | E   | T   | E   | S   | I   | Y   |   |   |
| CTC-L1.E2-1    | G  |    |    |    |     |     | A   |     | S |                                      |    | E  |    |     |     |     |     |     |     |     |     |     |     | N   |     | C |   |
| CTC-L1.E2-2    | G  |    |    |    |     |     |     |     |   |                                      |    |    |    |     |     |     |     |     |     |     |     |     |     |     |     |   | C |
| CTC-L1.E2-3    | G  |    |    |    |     |     |     |     |   |                                      |    |    |    |     |     |     |     |     |     |     |     |     |     |     |     |   | C |
| CTC-L1.E2-4    | G  |    |    |    |     |     |     |     |   |                                      |    |    |    |     |     |     |     |     |     |     |     |     |     |     |     |   | C |
| CTC-L2.E2-5    | G  |    |    |    |     |     |     | T   |   |                                      | R  |    |    |     |     |     |     |     |     |     |     |     |     |     |     |   | C |
| CTC-L2.E2-6    | G  |    |    |    |     |     |     |     |   |                                      |    |    |    |     |     |     |     |     |     |     |     |     |     |     |     |   | C |
| CTC-L2.E2-7    | G  |    |    |    |     |     |     |     |   |                                      |    |    |    |     |     |     |     |     |     |     |     |     |     |     |     |   | C |
| CTC-L2.E2-8    | G  |    |    |    |     |     |     |     |   |                                      |    |    |    |     |     |     |     |     |     |     |     |     |     |     |     |   | C |
| CTG-L2.E2-9    | G  |    |    |    |     |     |     |     |   |                                      |    |    |    |     |     |     |     |     |     |     |     |     |     |     |     |   | F |
| CTG-L2.E2-10   | G  |    |    |    |     |     |     |     |   |                                      |    |    |    |     |     |     |     |     |     |     |     |     |     |     |     |   | C |
| CTG-L2.E2-11   | G  |    |    |    |     |     |     |     |   |                                      |    |    |    |     |     |     |     |     |     |     |     |     |     |     |     |   | F |
| CTG-L2.E2-11   | G  |    |    |    |     |     |     |     |   |                                      |    |    |    |     |     |     |     |     |     |     |     |     |     |     |     |   | C |
| CTT-L2.E2-12   | G  |    |    |    |     |     |     |     |   |                                      |    |    |    |     |     |     |     |     |     |     |     |     |     |     |     |   | F |
| CTT-L2.E2-13   | G  |    |    |    |     |     |     |     |   |                                      |    |    |    |     |     |     |     |     |     |     |     |     |     |     |     |   | C |
| CTT-L2.E2-14   | G  |    |    |    |     |     |     |     |   |                                      |    |    |    |     |     |     |     |     |     |     |     |     |     |     |     |   | C |
| CTT-L2.E2-15   | G  |    |    |    |     |     |     |     |   |                                      |    |    |    |     |     |     |     |     |     |     |     |     |     |     |     |   | C |
| TTG-L2.E2-16   | G  |    |    |    |     |     |     |     |   |                                      |    |    |    |     |     |     |     |     |     |     |     |     |     |     |     |   | C |
| TTG-L2.E2-17   | G  |    |    |    |     |     |     |     |   |                                      |    |    |    |     |     |     |     |     |     |     |     |     |     |     |     |   | C |
| TTT-L1.E2-18   | G  |    |    |    |     |     |     |     |   |                                      |    |    |    |     |     |     |     |     |     |     |     |     |     |     |     |   | C |
| TTT-L1.E2-19   | G  |    |    |    |     |     |     |     |   |                                      |    |    |    |     |     |     |     |     |     |     |     |     |     |     |     |   | C |
| TTT-L1.E2-20   | G  |    |    |    |     |     |     |     |   |                                      |    |    |    |     |     |     |     |     |     |     |     |     |     |     |     |   | C |

| dNme2Cas9 (N-terminal: REC/HNH/RuvC) |     |     |     |     |     |     |     |     |     |     |     |     |     |     |     |     |     |     |     |     |     |     |     |     |   |
|--------------------------------------|-----|-----|-----|-----|-----|-----|-----|-----|-----|-----|-----|-----|-----|-----|-----|-----|-----|-----|-----|-----|-----|-----|-----|-----|---|
| Residue number                       | 451 | 452 | 462 | 508 | 520 | 532 | 536 | 545 | 581 | 624 | 633 | 634 | 659 | 701 | 719 | 720 | 762 | 767 | 768 | 769 | 770 | 771 | 792 | 813 |   |
| wild-type                            | D   | H   | I   | E   | E   | K   | K   | V   | K   | N   | Q   | E   | E   | Q   | N   | D   | T   | H   | Q   | K   | T   | H   | G   | K   |   |
| CTC-L1.E2-1                          |     |     |     |     |     |     |     |     |     |     |     |     |     |     |     |     |     |     |     |     |     |     |     |     | R |
| CTC-L1.E2-2                          |     |     |     |     |     |     |     |     |     |     |     |     |     |     |     |     |     |     |     |     |     |     |     |     | R |
| CTC-L1.E2-3                          |     |     |     |     |     |     |     |     |     |     |     |     |     |     |     |     |     |     |     |     |     |     |     |     | R |
| CTC-L1.E2-4                          |     |     |     |     |     |     |     |     |     |     |     |     |     |     |     |     |     |     |     |     |     |     |     |     | R |
| CTC-L2.E2-5                          |     |     |     |     |     |     |     |     |     |     |     |     |     |     |     |     |     |     |     |     |     |     |     |     | R |
| CTC-L2.E2-6                          |     |     |     |     |     |     |     |     |     |     |     |     |     |     |     |     |     |     |     |     |     |     |     |     | R |
| CTC-L2.E2-7                          |     |     |     |     |     |     |     |     |     |     |     |     |     |     |     |     |     |     |     |     |     |     |     |     | R |
| CTC-L2.E2-8                          |     |     |     |     |     |     |     |     |     |     |     |     |     |     |     |     |     |     |     |     |     |     |     |     | R |
| CTG-L2.E2-9                          |     |     |     |     |     |     |     |     |     |     |     |     |     |     |     |     |     |     |     |     |     |     |     |     | R |
| CTG-L2.E2-10                         |     |     |     |     |     |     |     |     |     |     |     |     |     |     |     |     |     |     |     |     |     |     |     |     | R |
| CTG-L2.E2-11                         |     |     |     |     |     |     |     |     |     |     |     |     |     |     |     |     |     |     |     |     |     |     |     |     | R |
| CTT-L2.E2-12                         |     |     |     |     |     |     |     |     |     |     |     |     |     |     |     |     |     |     |     |     |     |     |     |     | R |
| CTT-L2.E2-13                         |     |     |     |     |     |     |     |     |     |     |     |     |     |     |     |     |     |     |     |     |     |     |     |     | R |
| CTT-L2.E2-14                         |     |     |     |     |     |     |     |     |     |     |     |     |     |     |     |     |     |     |     |     |     |     |     |     | R |
| CTT-L2.E2-15                         |     |     |     |     |     |     |     |     |     |     |     |     |     |     |     |     |     |     |     |     |     |     |     |     | R |
| TTG-L2.E2-16                         |     |     |     |     |     |     |     |     |     |     |     |     |     |     |     |     |     |     |     |     |     |     |     |     | R |
| TTG-L2.E2-17                         |     |     |     |     |     |     |     |     |     |     |     |     |     |     |     |     |     |     |     |     |     |     |     |     | R |
| TTT-L1.E2-18                         |     |     |     |     |     |     |     |     |     |     |     |     |     |     |     |     |     |     |     |     |     |     |     |     | R |
| TTT-L1.E2-19                         |     |     |     |     |     |     |     |     |     |     |     |     |     |     |     |     |     |     |     |     |     |     |     |     | R |
| TTT-L1.E2-20                         |     |     |     |     |     |     |     |     |     |     |     |     |     |     |     |     |     |     |     |     |     |     |     |     | R |

| dNme2Cas9 (C-terminal: WED_PID) |     |     |     |     |     |     |     |     |     |     |     |     |      |      |      |      |      |      |      |      |  |
|---------------------------------|-----|-----|-----|-----|-----|-----|-----|-----|-----|-----|-----|-----|------|------|------|------|------|------|------|------|--|
| Residue number                  | 844 | 858 | 869 | 911 | 929 | 932 | 933 | 951 | 968 | 981 | 986 | 991 | 1005 | 1025 | 1028 | 1033 | 1043 | 1045 | 1049 | 1075 |  |
| wild-type                       | D   | K   | I   | D   | K   | E   | S   | M   | Y   | N   | I   | Y   | K    | I    | D    | R    | S    | E    | R    | L    |  |
| CTC-L1.E2-1                     |     |     |     |     |     |     |     |     |     |     |     |     |      |      |      |      |      |      |      |      |  |
| CTC-L1.E2-2                     |     |     |     |     |     |     |     |     |     |     |     |     |      |      |      |      |      |      |      |      |  |
| CTC-L1.E2-3                     |     |     |     |     |     |     |     |     |     |     |     |     |      |      |      |      |      |      |      |      |  |
| CTC-L1.E2-4                     |     |     |     |     |     |     |     |     |     |     |     |     |      |      |      |      |      |      |      |      |  |
| CTC-L2.E2-5                     |     |     |     |     |     |     |     |     |     |     |     |     |      |      |      |      |      |      |      |      |  |
| CTC-L2.E2-6                     |     |     |     |     |     |     |     |     |     |     |     |     |      |      |      |      |      |      |      |      |  |
| CTC-L2.E2-7                     |     |     |     |     |     |     |     |     |     |     |     |     |      |      |      |      |      |      |      |      |  |
| CTC-L2.E2-8                     |     |     |     |     |     |     |     |     |     |     |     |     |      |      |      |      |      |      |      |      |  |
| CTG-L2.E2-9                     |     |     |     |     |     |     |     |     |     |     |     |     |      |      |      |      |      |      |      |      |  |
| CTG-L2.E2-10                    |     |     |     |     |     |     |     |     |     |     |     |     |      |      |      |      |      |      |      |      |  |
| CTG-L2.E2-11                    |     |     |     |     |     |     |     |     |     |     |     |     |      |      |      |      |      |      |      |      |  |
| CTT-L2.E2-12                    |     |     |     |     |     |     |     |     |     |     |     |     |      |      |      |      |      |      |      |      |  |
| CTT-L2.E2-13                    |     |     |     |     |     |     |     |     |     |     |     |     |      |      |      |      |      |      |      |      |  |
| CTT-L2.E2-14                    |     |     |     |     |     |     |     |     |     |     |     |     |      |      |      |      |      |      |      |      |  |
| CTT-L2.E2-15                    |     |     |     |     |     |     |     |     |     |     |     |     |      |      |      |      |      |      |      |      |  |
| TTG-L2.E2-16                    |     |     |     |     |     |     |     |     |     |     |     |     |      |      |      |      |      |      |      |      |  |
| TTG-L2.E2-17                    |     |     |     |     |     |     |     |     |     |     |     |     |      |      |      |      |      |      |      |      |  |
| TTT-L1.E2-18                    |     |     |     |     |     |     |     |     |     |     |     |     |      |      |      |      |      |      |      |      |  |
| TTT-L1.E2-19                    |     |     |     |     |     |     |     |     |     |     |     |     |      |      |      |      |      |      |      |      |  |
| TTT-L1.E2-20                    |     |     |     |     |     |     |     |     |     |     |     |     |      |      |      |      |      |      |      |      |  |

**b**

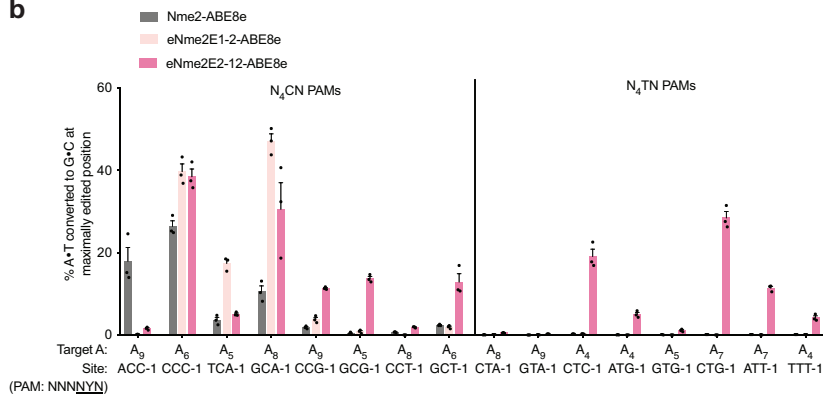

**Supplementary Figure 10. Mutation table and representative activity of ePACE2 evolved Nme2Cas9 variants. (a) Genotypes of individually sequenced plaques following**

ePACE2, with positions varying from wild-type displayed. Clones evolved on different PAMs are delineated by a bold line. Mutations that had previously appeared in ePACE1 are shown in light pink, while novel mutations are shown in magenta. **(b)** Adenine base editing activity of a representative ePACE2 clone (E2-12-ABE8e) at eight N<sub>4</sub>CN PAM-containing sites and eight N<sub>4</sub>TN PAM-containing sites in HEK293T cells. Mean±SEM are shown and are representative of *n*=3 independent biological replicates.

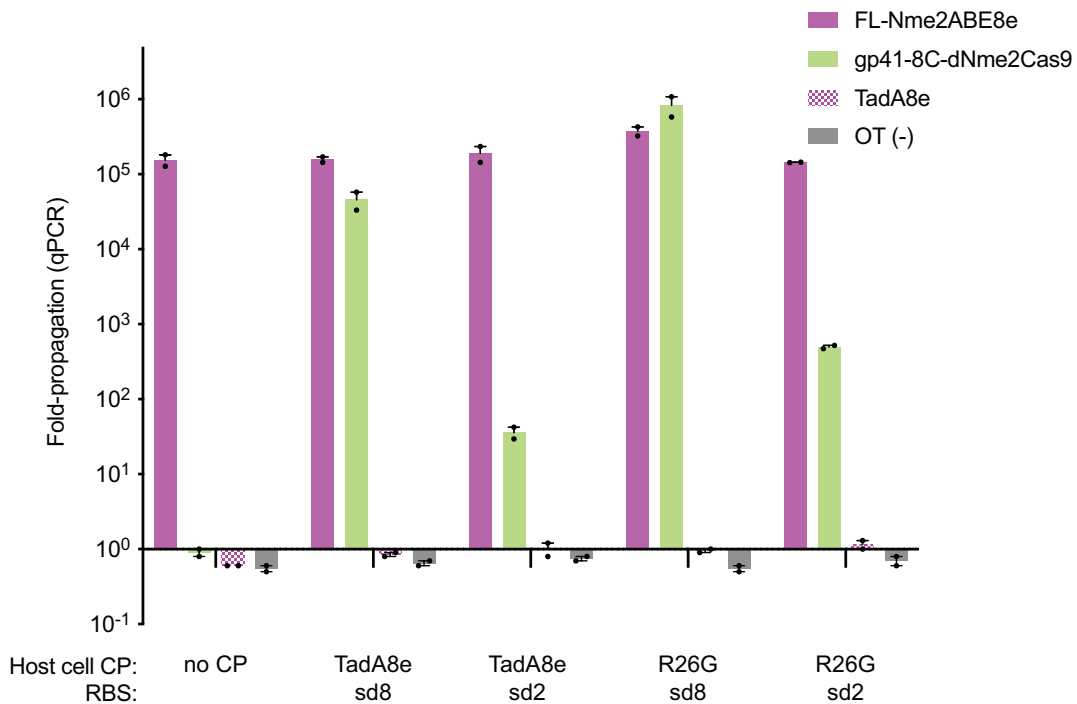

**Supplementary Figure 11. Validation of the split-SAC-PACE selection with different TadABE8e variants.** Overnight propagation assay to test the activity of the split-SAC-PACE selection with different TadA8e variants. Each TadA8e variant was fused to the N-terminal half of an intein (gp41-8N) and placed on a complementary plasmid (CP) in host cells. FL-Nme2ABE8e phage contained full-length, active Nme2ABE8e, and OT phage did not contain Nme2Cas9, intein, or TadA8e. Mean $\pm$ SEM are shown and are representative of  $n=2$  independent biological replicates. Fold-propagation is calculated as the ratio of phage titer after overnight propagation over inoculating titer.



## NNNCTN PAMs

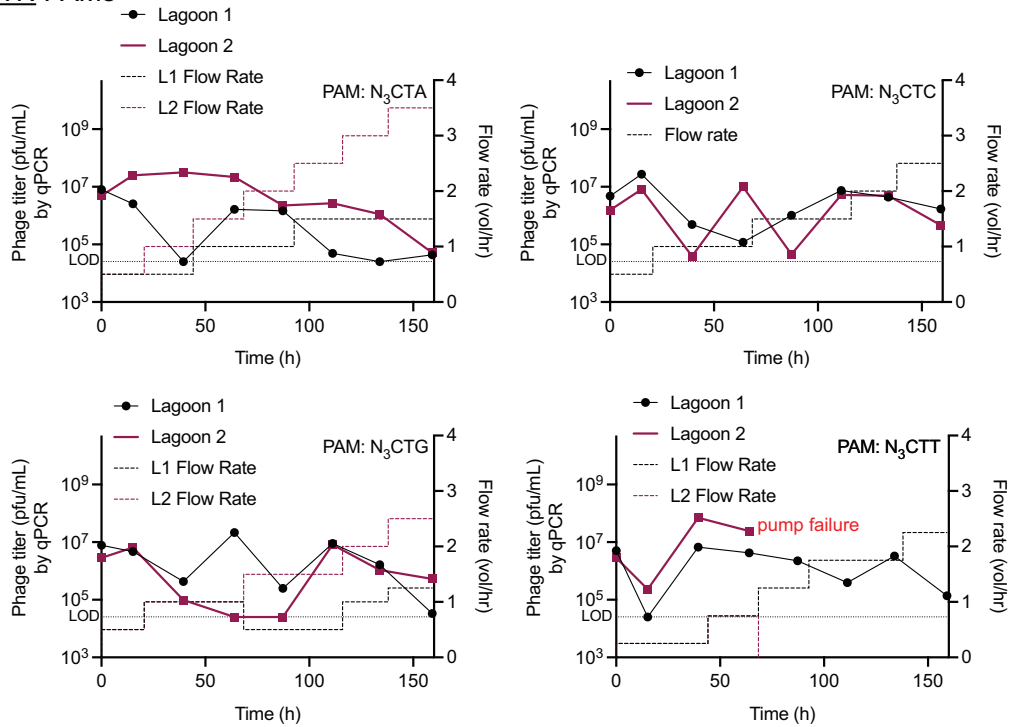

## NNNTTN PAMs

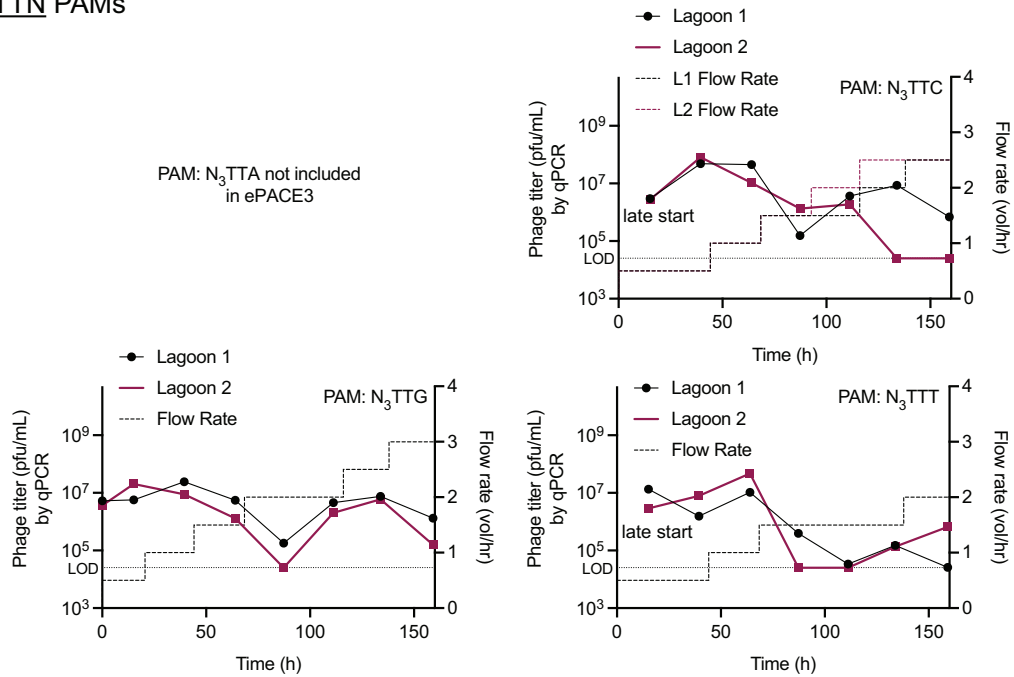

**Supplementary Figure 12. Flow rate schedule and titers for ePACE3.** SP from ePACE1 sequenced SP from ePACE2 were pooled and recloned into the split-SAC-PACE phage architecture (SP404, **Supplementary Table 7**), then seeded into ePACE3 (seven chemostats, two lagoons each targeting each of the eight N<sub>3</sub>YTN PAMs; N<sub>3</sub>TTA was excluded due to a cloning error). Flow rate stringency for each PAM is shown in the plots, as are resulting titers (measured by qPCR). The N<sub>3</sub>TTC and N<sub>3</sub>TTT lagoons were started late due to slow initial host cell growth. LOD=limit of detection of qPCR titering, as set by the titer corresponding to the C<sub>q</sub> for which the qPCR primers alone had been observed to amplify.

**a**

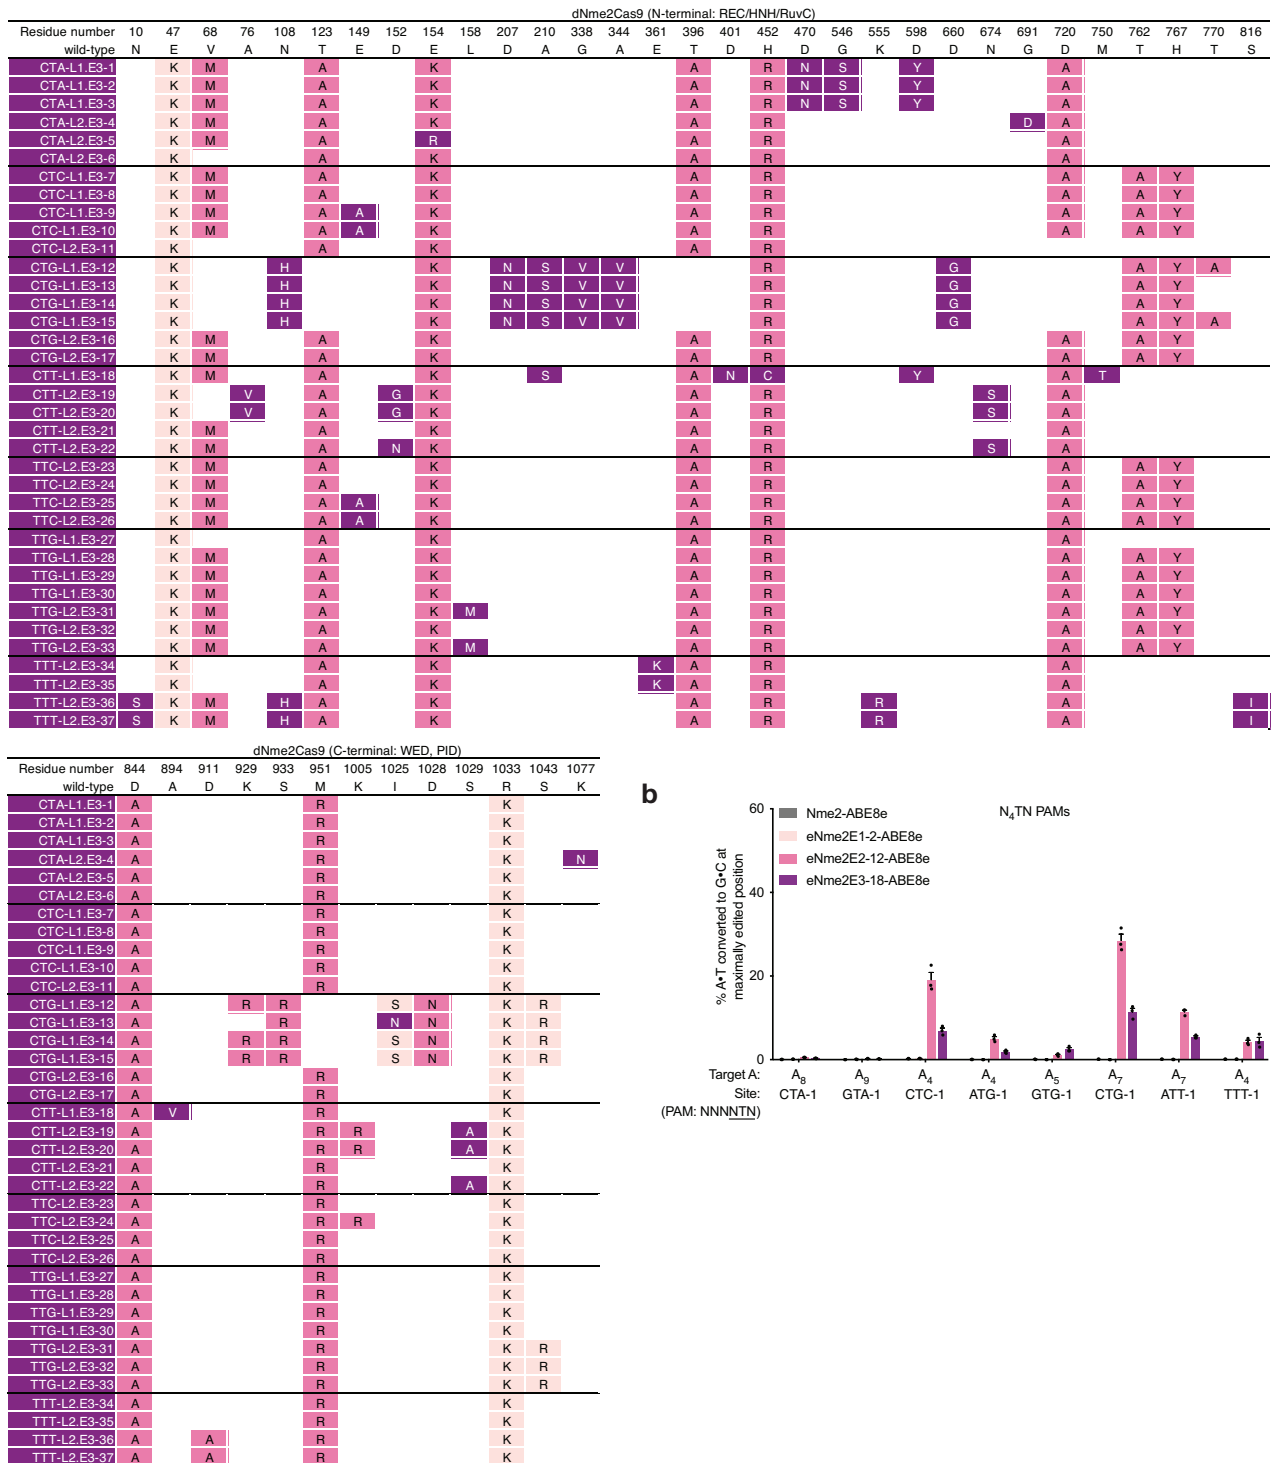

**b**

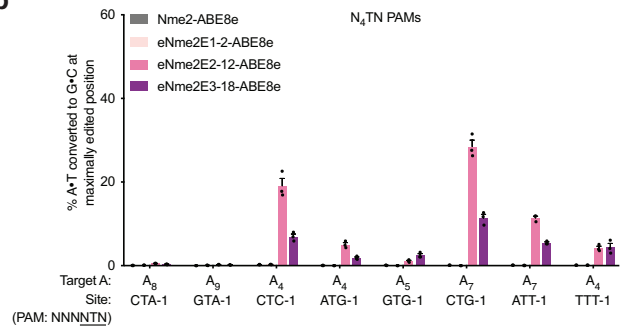

**Supplementary Figure 13. Mutation table and representative activity of ePACE3 evolved Nme2Cas9 variants. (a)** Genotypes of individually sequenced plaques following ePACE3, with positions varying from wild-type displayed. Clones evolved on different PAMs are delineated by a bold line. Mutations that had previously appeared in ePACE1 and ePACE2 are shown in light pink and magenta, respectively, while novel mutations are shown in purple. **(b)** Adenine base editing activity of a representative ePACE3 clone (E3-18-ABE8e) at eight N<sub>4</sub>TN PAM-containing sites in HEK293T cells. Mean±SEM are shown and are representative of *n*=3 independent biological replicates.

**a**

| Passage /PAM | Replicate 1 dilution table |     |     |      |      |      | Replicate 2 dilution table |     |     |      |      |      | Notes                                   |
|--------------|----------------------------|-----|-----|------|------|------|----------------------------|-----|-----|------|------|------|-----------------------------------------|
|              | ACA                        | ACG | ACT | TCA  | TCG  | TCT  | ACA                        | ACG | ACT | TCA  | TCG  | TCT  |                                         |
| 1            | 20                         | 20  |     | 20   | 20   |      | 20                         | 20  |     | 20   | 20   |      |                                         |
| 2            | 20                         | 20  |     | 20   | 20   |      | 20                         | 20  |     | 20   | 20   |      |                                         |
| 3            | 13                         | 13  |     | 13   | 13   |      | 13                         | 13  |     | 13   | 13   |      | Pa2 (1:20) + MP6-diversified Pa1 (1:40) |
| 4            | 20                         | 20  |     | 20   | 20   |      | 20                         | 20  |     | 20   | 20   |      |                                         |
| 5            | 20                         | 20  |     | 20   | 20   |      | 20                         | 20  |     | 20   | 20   |      |                                         |
| 6            | 20                         | 20  |     | 20   | 20   |      | 20                         | 20  |     | 20   | 20   |      | Host strain: 2208+MP6                   |
| 7            | 20                         | 20  |     | 20   | 20   |      | 20                         | 20  |     | 20   | 20   |      |                                         |
| 8            | 20                         | 20  |     | 20   | 20   |      | 20                         | 20  |     | 20   | 20   |      | Host strain: 2208+MP6                   |
| 9            | 20                         | 20  |     | 20   | 20   |      | 20                         | 20  |     | 20   | 20   |      |                                         |
| 10           | 20                         | 20  |     | 20   | 20   |      | 20                         | 20  |     | 20   | 20   |      | Host strain: 2208+MP6                   |
| 11           | 20                         | 20  | 20  | 20   | 20   | 20   | 20                         | 20  | 20  | 20   | 20   | 20   | ACT/TCT PAMs added, 1:20 pooled PAMs    |
| 12           | 20                         | 20  | 20  | 20   | 20   | 20   | 20                         | 20  | 20  | 20   | 20   | 20   |                                         |
| 13           | 20                         | 20  | 20  | 20   | 20   | 20   | 20                         | 20  | 20  | 20   | 20   | 20   |                                         |
| 14           | 20                         | 20  | 20  | 20   | 20   | 20   | 20                         | 20  | 20  | 20   | 20   | 20   |                                         |
| 15           | 20                         | 20  | 20  | 100  | 100  | 100  | 20                         | 20  | 20  | 100  | 100  | 100  |                                         |
| 16           | 20                         | 20  | 20  | 100  | 100  | 100  | 20                         | 20  | 20  | 100  | 100  | 100  |                                         |
| 17           | 20                         | 20  | 20  | 600  | 600  | 600  | 20                         | 20  | 20  | 600  | 600  | 600  |                                         |
| 18           | 20                         | 20  | 20  | 600  | 600  | 600  | 20                         | 20  | 20  | 600  | 600  | 600  |                                         |
| 19           | 20                         | 20  | 20  | 6000 | 6000 | 6000 | 20                         | 20  | 20  | 6000 | 6000 | 6000 | ACN PAMs - Host strain 2208+MP6         |
| 20           | 20                         | 20  | 20  | 6000 | 6000 | 6000 | 20                         | 20  | 20  | 6000 | 6000 | 6000 | ACN PAMs - spiked 1:600 TCN phage       |

| Passage /PAM | Replicate 3 dilution table |     |     |     |     |     | Replicate 4 dilution table |     |     |     |     |     | Notes                                   |
|--------------|----------------------------|-----|-----|-----|-----|-----|----------------------------|-----|-----|-----|-----|-----|-----------------------------------------|
|              | ACA                        | ACG | ACT | TCA | TCG | TCT | ACA                        | ACG | ACT | TCA | TCG | TCT |                                         |
| 1            | 20                         | 20  |     | 20  | 20  |     | 20                         | 20  |     | 20  | 20  |     |                                         |
| 2            | 20                         | 20  |     | 20  | 20  |     | 20                         | 20  |     | 20  | 20  |     |                                         |
| 3            | 13                         | 13  |     | 13  | 13  |     | 13                         | 13  |     | 13  | 13  |     | Pa2 (1:20) + MP6-diversified Pa1 (1:40) |
| 4            | 20                         | 20  |     | 20  | 20  |     | 20                         | 20  |     | 20  | 20  |     |                                         |
| 5            | 20                         | 20  |     | 20  | 20  |     | 20                         | 20  |     | 20  | 20  |     |                                         |
| 6            | 20                         | 20  |     | 20  | 20  |     | 20                         | 20  |     | 20  | 20  |     | Host strain: 2208+MP6                   |
| 7            | 20                         | 20  |     | 20  | 20  |     | 20                         | 20  |     | 20  | 20  |     |                                         |
| 8            | 20                         | 20  |     | 20  | 20  |     | 20                         | 20  |     | 20  | 20  |     | Host strain: 2208+MP6                   |
| 9            | 20                         | 20  |     | 20  | 20  |     | 20                         | 20  |     | 20  | 20  |     |                                         |
| 10           | 20                         | 20  |     | 20  | 20  |     | 20                         | 20  |     | 20  | 20  |     | Host strain: 2208+MP6                   |
| 11           | 20                         | 20  | 20  | 20  | 20  | 20  | 20                         | 20  | 20  | 20  | 20  | 20  | ACT/TCT PAMs added, 1:20 pooled PAMs    |
| 12           | 20                         | 20  | 20  | 20  | 20  | 20  | 20                         | 20  | 20  | 20  | 20  | 20  | Pa11 (1:40) + Pa6 (1:40)                |
| 13           | 20                         | 20  | 20  | 20  | 20  | 20  | 20                         | 20  | 20  | 20  | 20  | 20  |                                         |
| 14           | 20                         | 20  | 20  | 20  | 20  | 20  | 20                         | 20  | 20  | 20  | 20  | 20  |                                         |
| 15           | 20                         | 20  | 20  | 20  | 20  | 20  | 20                         | 20  | 20  | 20  | 20  | 20  | Host strain: 2208+MP6, Pa13 & Pa14      |
| 16           | 20                         | 20  | 20  | 20  | 20  | 20  | 20                         | 20  | 20  | 20  | 20  | 20  |                                         |
| 17           | 20                         | 20  | 20  | 20  | 20  | 20  | 20                         | 20  | 20  | 20  | 20  | 20  |                                         |
| 18           | 20                         | 20  | 20  | 20  | 20  | 20  | 20                         | 20  | 20  | 20  | 20  | 20  |                                         |
| 19           | 20                         | 20  | 20  | 20  | 20  | 20  | 20                         | 20  | 20  | 20  | 20  | 20  | ACN PAMs - Host strain 2208+MP6         |
| 20           | 20                         | 20  | 20  | 20  | 20  | 20  | 20                         | 20  | 20  | 20  | 20  | 20  | ACN PAMs - spiked 1:600 TCN phage       |

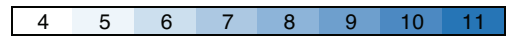

**b**

| PANCE conditions |                                                                                                                |
|------------------|----------------------------------------------------------------------------------------------------------------|
| AP               | proC-split-Npu-gIII<br>(Target PAMs CTTNCNT, AGGNCNG)                                                          |
| CP               | psp-sd8-TadA8e R26G                                                                                            |
| MP               | MP6                                                                                                            |
| SP               | Replicate 1 & 2: wild-type split-dNme2Cas9<br>Replicate 3 & 4: ePACE1 & ePACE2 pool,<br>recloned as split Cas9 |

**Supplementary Figure 14. PANCE dilution schedule and titers for N1.** SP containing wild-type split-dNme2Cas9 or pooled ePACE1/ePACE2 split-Nme2Cas9 were first diversified in *E. coli* host cells containing pJC175e<sup>2</sup> and MP6<sup>2</sup>, isolated, then seeded into PANCE1 (N1, 6

chemostats of each of six N<sub>3</sub>WTD PAMs, where W=A or T and D=A,G, or T; 4 replicates). **(a)** Passage stringency schedule and resulting titers (measured by qPCR) for replicates 1 and 2 (top) or replicates 3 and 4 (bottom). Passages were done after 16-24 hr for all passages. For some passages, some conditions were passaged uniquely to others or in a different host cell line, and these changes are listed in the Notes column. Grey coloring represents titers that were not measured or the PAM had not yet been included. All N<sub>3</sub>ACD PAMs were unable to support phage propagation, which retroactively was discovered to be attributable to an AP design error (see **Supplementary Note 6**). LOD=limit of detection of qPCR titering, as set by the titer corresponding to the C<sub>q</sub> for which the qPCR primers alone had been observed to amplify. **(b)** PANCE conditions used for N1.

### NNNACD PAMs

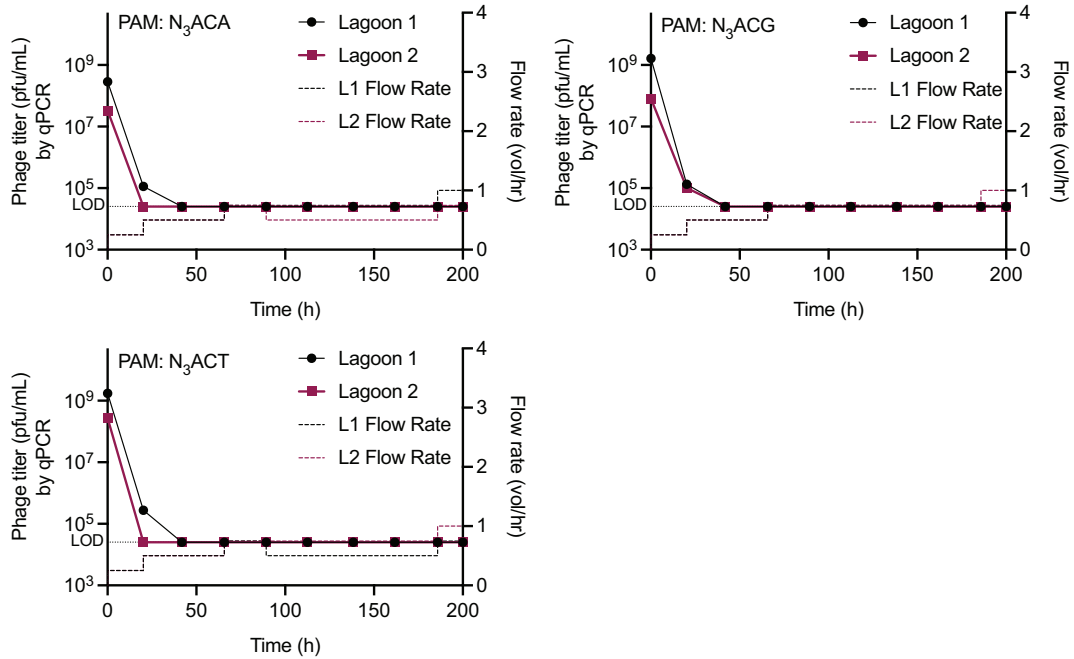

### NNNTCD PAMs

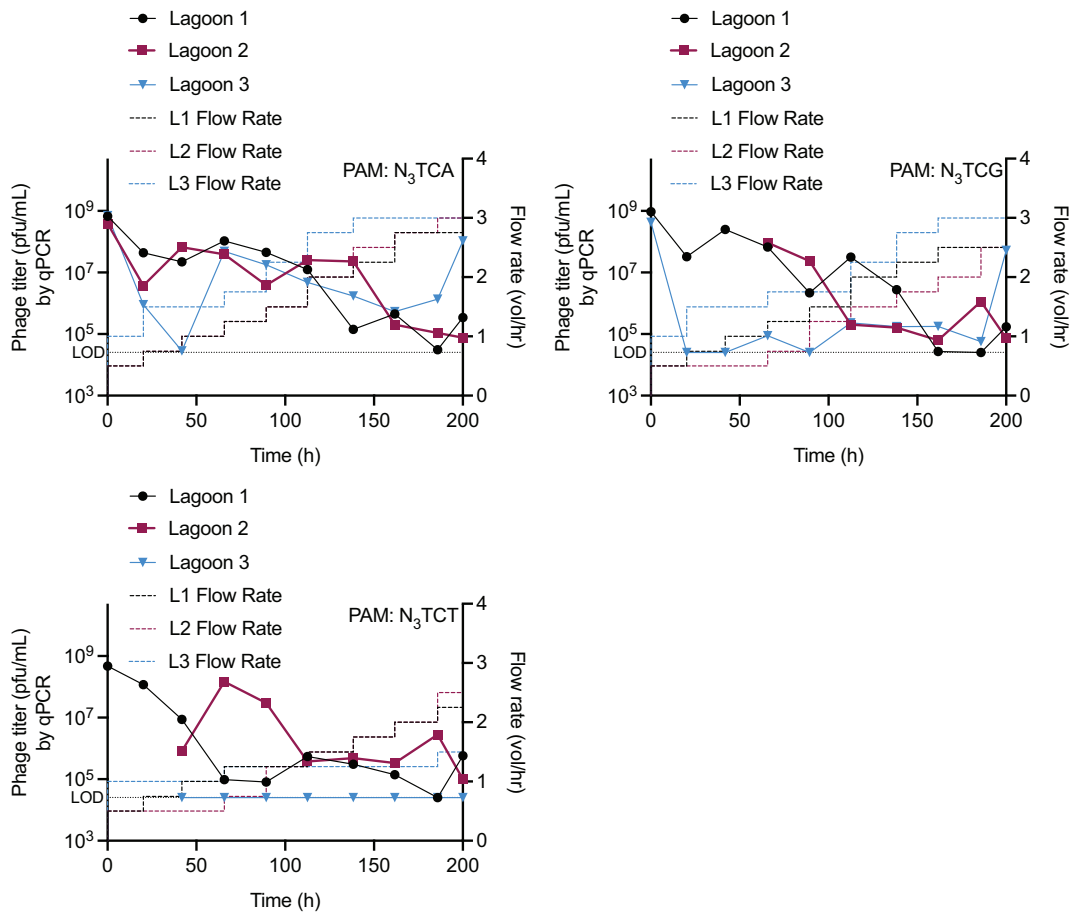

**Supplementary Figure 15. Flow rate schedule and titers for ePACE4.** SP from N1, passage 20, were combined and seeded into corresponding PAMs in ePACE4 (six chemostats, two lagoons each of the three N<sub>3</sub>ACD PAMs, where D=A,G, or T, three lagoons

each of the three N<sub>3</sub>TCD PAMs). N1 replicates 1 and 2 were pooled into “Lagoon 1” lagoons, N1 replicates 3 and 4 were pooled into “Lagoon 2” lagoons, and all N1 replicates were pooled into any “Lagoon 3” lagoons. The N<sub>3</sub>ACD PAMs all washed out, which retroactively was discovered to be attributable to an AP design error (see **Supplementary Note 6**). Flow rate stringency for each PAM is shown in the plots, as are resulting titers (measured by qPCR). LOD=limit of detection of qPCR titering, as set by the titer corresponding to the C<sub>q</sub> for which the qPCR primers alone had been observed to amplify.

**a**

| Passage /PAM | Replicate 1 dilution table |     |     |     |     |     |     |     | Replicate 2 dilution table |     |     |     |     |     |     |     | Replicate 3 dilution table |     |     |     |     |     |     |     |
|--------------|----------------------------|-----|-----|-----|-----|-----|-----|-----|----------------------------|-----|-----|-----|-----|-----|-----|-----|----------------------------|-----|-----|-----|-----|-----|-----|-----|
|              | CTA                        | CTC | CTG | CTT | TTA | TTC | TTG | TTT | CTA                        | CTC | CTG | CTT | TTA | TTC | TTG | TTT | CTA                        | CTC | CTG | CTT | TTA | TTC | TTG | TTT |
| 1            | 20                         |     |     | 20  | 20  |     | 20  | 20  | 20                         |     |     | 20  | 20  |     | 20  | 20  | 20                         |     |     | 20  | 20  |     | 20  | 20  |
| 2            | 20                         |     |     | 20  | 20  |     | 20  | 20  | 20                         |     |     | 20  | 20  |     | 20  | 20  | 20                         |     |     | 20  | 20  |     | 20  | 20  |
| 3            | 20                         | 20  | 20  | 20  | 20  | 20  | 20  | 20  | 20                         | 20  | 20  | 20  | 20  | 20  | 20  | 20  | 20                         | 20  | 20  | 20  | 20  | 20  | 20  | 20  |
| 4            | 20                         | 20  | 20  | 20  | 20  | 20  | 20  | 20  | 20                         | 20  | 20  | 20  | 20  | 20  | 20  | 20  | 100                        | 100 | 100 | 100 | 100 | 100 | 100 | 100 |
| 5            | 20                         | 20  | 20  | 20  | 20  | 20  | 20  | 20  | 20                         | 20  | 20  | 20  | 20  | 20  | 20  | 20  | 100                        | 100 | 100 | 100 | 100 | 100 | 100 | 100 |
| 6            | 20                         | 20  | 20  | 20  | 20  | 20  | 20  | 20  | 20                         | 20  | 20  | 20  | 20  | 20  | 20  | 20  | 500                        | 500 | 500 | 500 | 500 | 500 | 500 | 500 |
| 7            |                            |     |     |     |     |     |     |     |                            |     |     |     |     |     |     |     | 500                        | 500 | 500 | 500 | 500 | 500 | 500 | 500 |

|   |   |   |   |   |   |    |    |
|---|---|---|---|---|---|----|----|
| 4 | 5 | 6 | 7 | 8 | 9 | 10 | 11 |
|---|---|---|---|---|---|----|----|

LOD  $\log_{10}$  titer (pfu/mL) by qPCR

| Passage /PAM | Notes                                   |
|--------------|-----------------------------------------|
| 1            |                                         |
| 2            |                                         |
| 3            | missing PAMs added, 1:20 starting phage |
| 4            | MP6-diversified Pa3 (1:20)              |
| 5            |                                         |
| 6            |                                         |
| 7            | Replicates 1 & 2 stopped                |

**b**

| PANCE conditions |                                                                                                                                                               |
|------------------|---------------------------------------------------------------------------------------------------------------------------------------------------------------|
| AP               | proC-split-Npu-gIII<br>(Target PAMs CTTNTNT, AGGNTNG)                                                                                                         |
| CP               | psp-sd8-TadA8e R26G                                                                                                                                           |
| MP               | MP6                                                                                                                                                           |
| SP               | Replicate 1: wild-type split-dNme2Cas9<br>Replicate 2: ePACE1 & ePACE2 pool,<br>recloned as split Cas9<br>Replicate 3: ePACE3 pool, recloned as split<br>Cas9 |

**Supplementary Figure 16. PANCE dilution schedule and titers for N2.** SP containing wild-type split-dNme2Cas9, pooled ePACE1/ePACE2 split-Nme2Cas9, or pooled ePACE3 split-Nme2Cas9 were first diversified in *E.coli* host cells containing pJC175e<sup>2</sup> and MP6<sup>2</sup>, isolated, then seeded into PANCE2 (N2, eight chemostats of each of eight N<sub>3</sub>YTN PAMs, where Y=C or T; three replicates). **(a)** Passage stringency schedule and resulting titers (measured by qPCR) for replicates 1-3. Passages were done after 16-24 hr for all passages. For some passages, some conditions were passaged uniquely to others or in a different host cell line, and these changes are listed in the Notes column. Grey coloring represents titers that were not measured or the PAM had not yet been included. LOD=limit of detection of qPCR titering, as set by the titer corresponding to the C<sub>q</sub> for which the qPCR primers alone had been observed to amplify. **(b)** PANCE conditions used for N2.

### NNNCTN PAMs

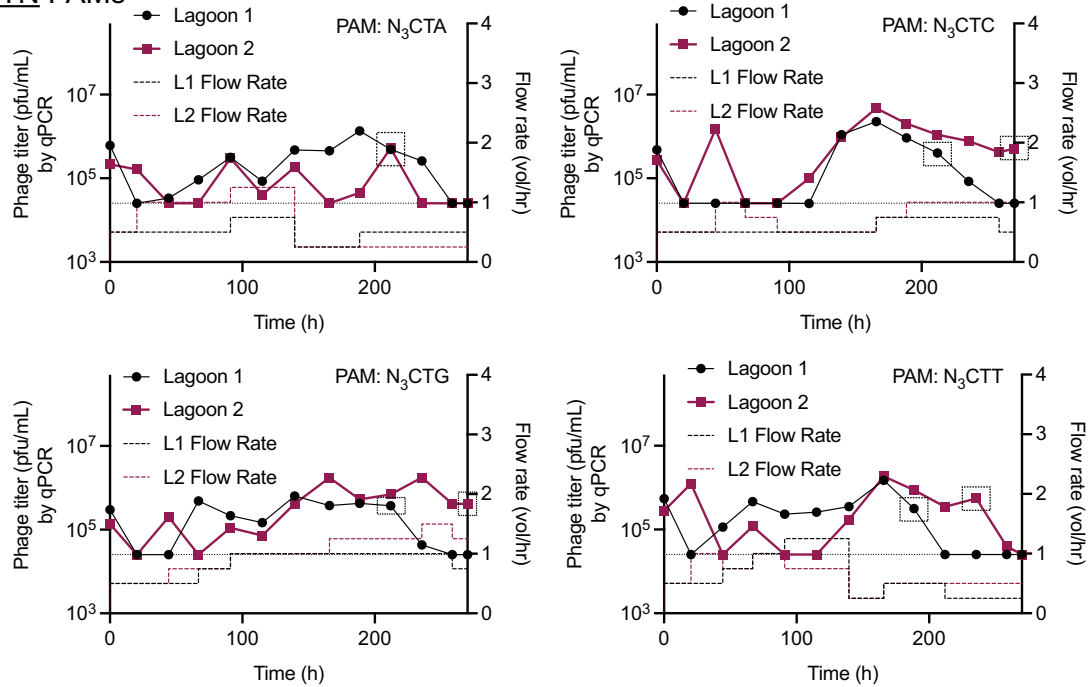

### NNNTTN PAMs

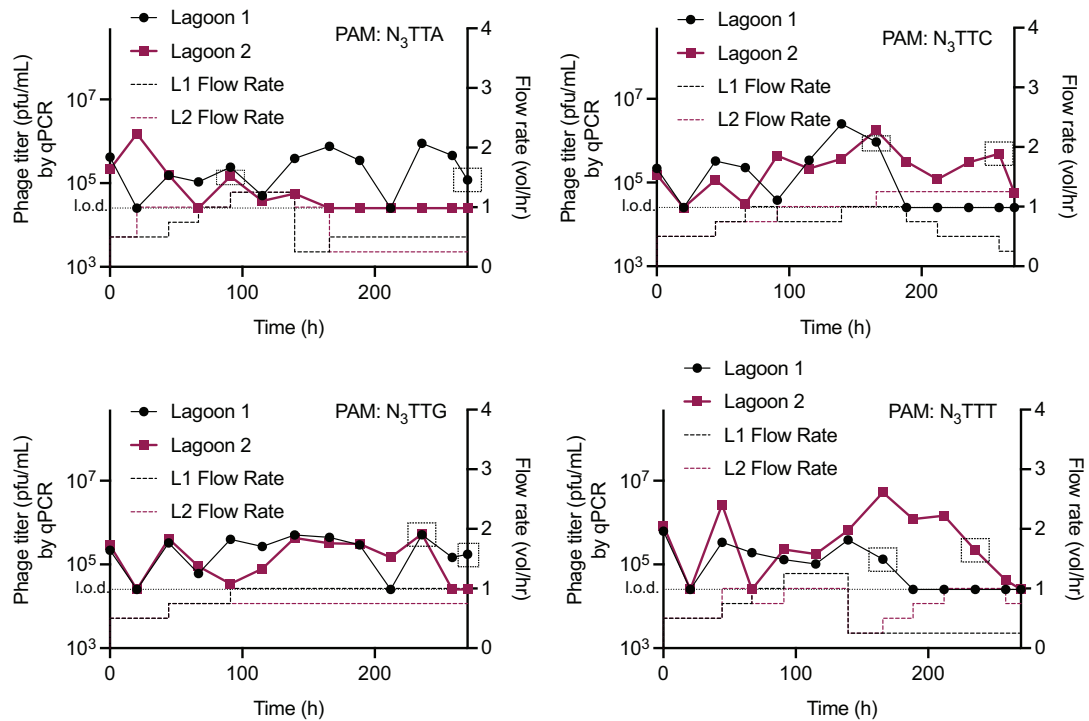

### Supplementary Figure 17. Flow rate schedule and titers for ePACE5.

SP from N2 replicate 3, passage 7, were combined and seeded into corresponding PAMs in ePACE5 (eight chemostats, two lagoons each of the eight N<sub>3</sub>YTN PAMs, where Y=C or T). Flow rate stringency for each PAM is shown in the plots, as are resulting titers (measured by qPCR). As most lagoons were unable to support consistent phage propagation, the timepoints used for isolating and sequencing phage (**Extended Data Figure 5**) are marked by a black box. LOD=limit of detection of qPCR titering, as set by the titer corresponding to the C<sub>q</sub> for which the qPCR primers alone had been observed to amplify.



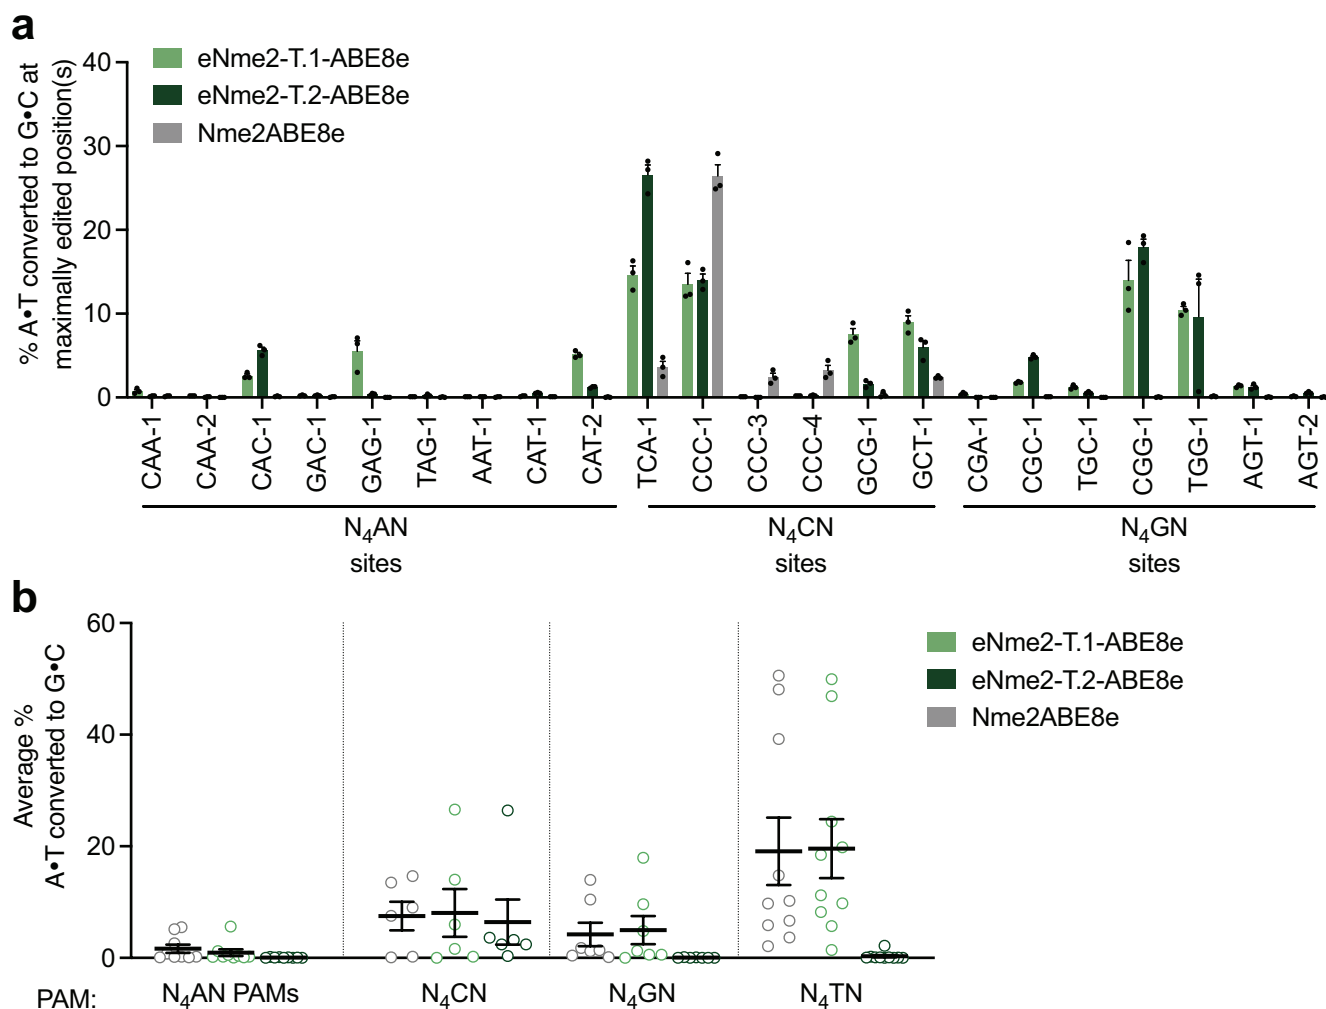

**Supplementary Figure 18. eNme2-T.1-ABE8e and eNme2-T.2-ABE8e activity at  $N_4VN$  PAM sites.** (a) Adenine base editing activity of eNme2-T.1-ABE8e and eNme2-T.2-ABE8e at 22  $N_3NVN$  PAM sites in HEK293T cells. Mean $\pm$ SEM is shown and reflects the average activity and standard error of  $n=3$  replicates at the maximally edited position within each genomic site. (b) Adenine base editing activity in (a) pooled by PAM position 5 ( $N_4NVN$ ) identity, also including pooled  $N_4TN$  sites from **Extended Data Figure 6a**. Each point represents the average editing of  $n=3$  independent biological replicates measured at the maximally edited position within each given genomic site. Mean $\pm$ SEM is shown and reflects the average activity and standard error of the pooled genomic site averages.

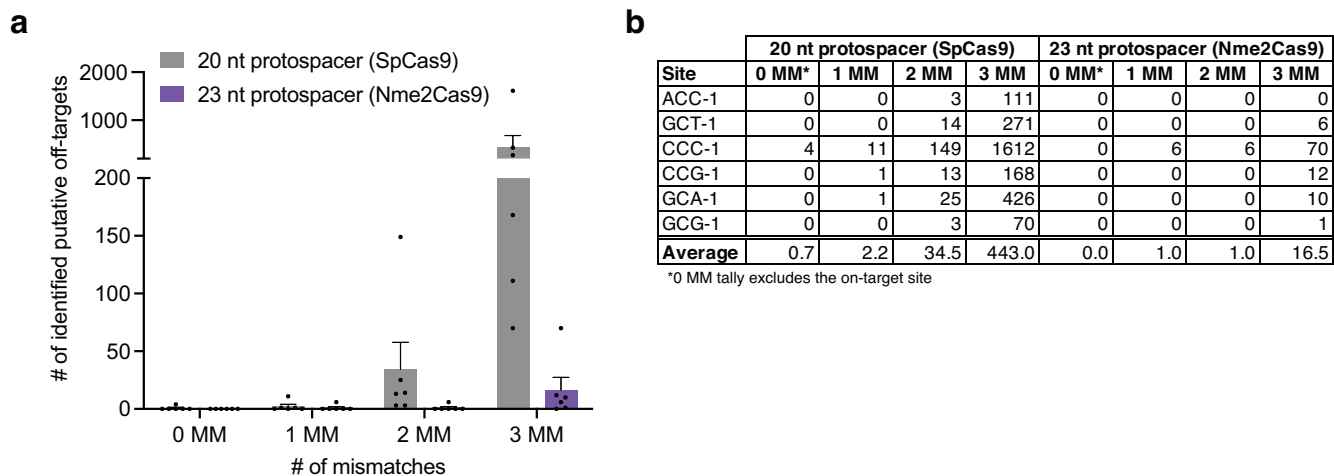

**Supplementary Figure 19. *In silico* prediction of off-target sites with  $\leq 3$  mismatches for a 20-nt or 23-nt protospacer. (a)** Count of genome-wide (GRCh38) sites with 0, 1, 2, or 3 mismatches to a 20-nt (SpCas9) or 23-nt (Nme2Cas9) protospacer identified with CHOPCHOPv3<sup>3</sup>. Mean $\pm$ SEM representing identified off-targets at six randomly selected 20-nt or 23-nt protospacers are shown. **(b)** Table listing the number of identified sites with the corresponding number of mismatches to a 20-nt or 23-nt protospacer at six randomly selected genomic sites (see **Supplementary Table 5**).

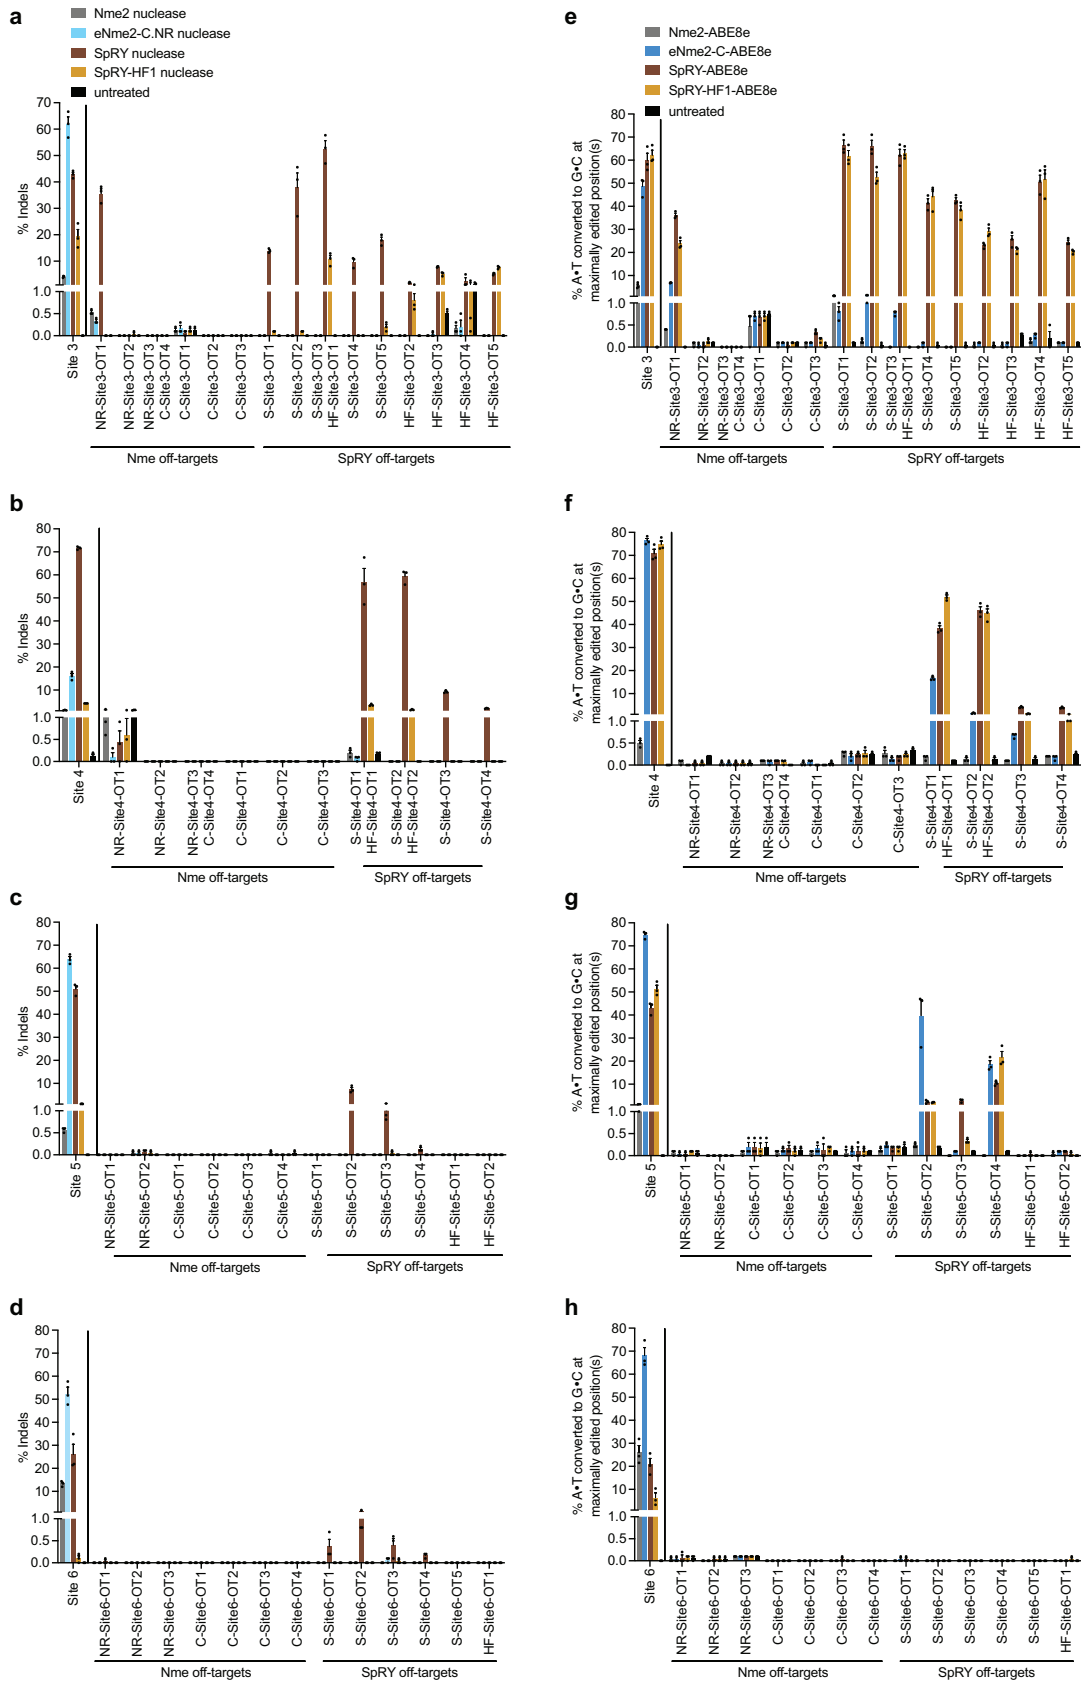

**Supplementary Figure 20. High-throughput sequencing validation of GUIDE-seq-identified off-target activity.** High-throughput sequencing in HEK293T cells at the top off-

target sites nominated by GUIDE-seq for eNme2-C, eNme2-C.NR, SpRY, or SpRY-HF1 nucleases (**Supplementary Table 3**). Off-target indel formation by Nme2Cas9, eNme2-C.NR, SpRY, or SpRY-HF1 nuclease at nominated off target sites for the sgRNAs targeting Site 3 (**a**), Site 4 (**b**), Site 5 (**c**), or Site 6 (**d**). Off-target adenine base editing by Nme2-ABE8e, eNme2-C-ABE8e, SpRY-ABE8e, or SpRY-HF1-ABE8e at nominated off-target sites for the sgRNAs targeting Site 3 (**d**), Site 4 (**e**), Site 5 (**f**), or Site 6 (**g**). Mean $\pm$ SEM is shown and reflects the average activity and standard error of  $n=3$  independent biological replicates measured at the maximally edited position within each given genomic site. On-target activity is shown at the left-most entry for each site.

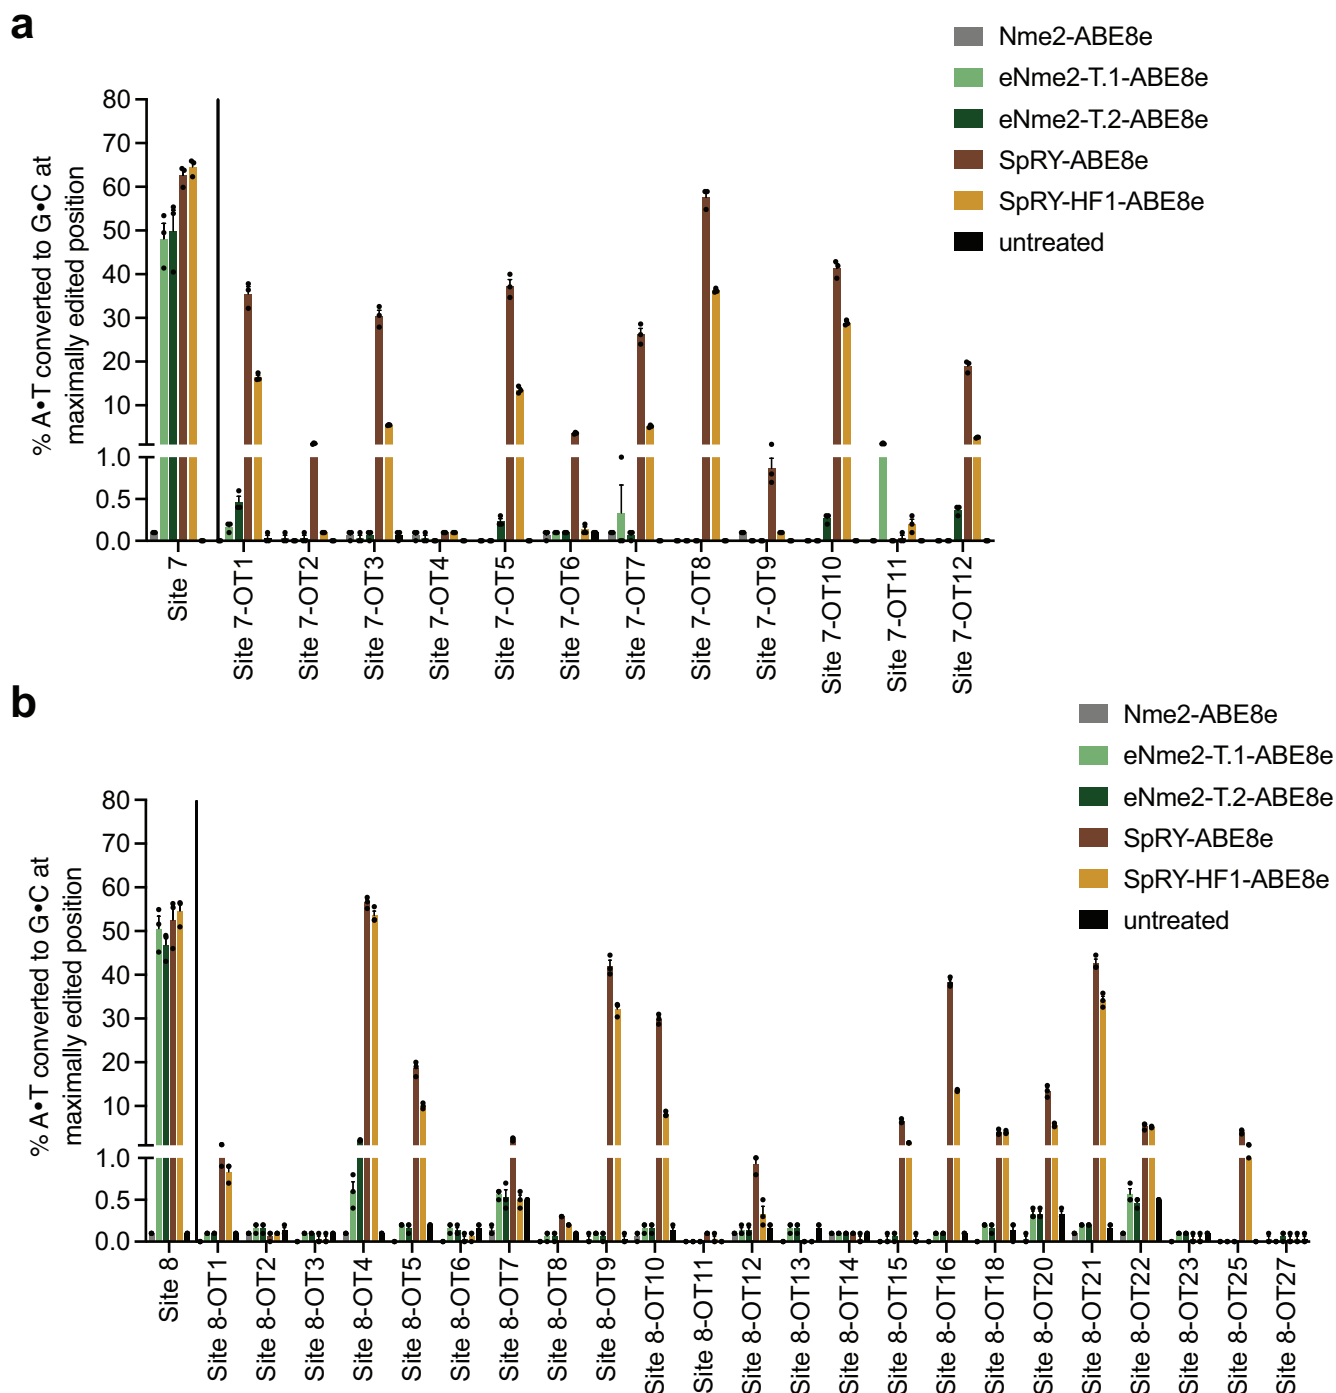

**Supplementary Figure 21. Off-target adenine base editing at *in silico*-predicted off-target sites for SpRY-ABE8e, SpRY-HF1-ABE8e, eNme2-T.1-ABE8e and eNme2-T.2-ABE8e.** (a) Off-target adenine base editing by SpRY-ABE8e, SpRY-HF1-ABE8e, eNme2-T.1-ABE8e and eNme2-T.2-ABE8e at (a) 12 computationally determined off-targets of a protospacer-matched sgRNA (Site 7) or (b) 23 computationally determined off-targets of a protospacer matched sgRNA (Site 8). Mean±SEM is shown and reflects the average activity and standard error of the of  $n=3$  independent biological replicates measured at the maximally edited position within each given genomic site. On-target activity is shown at the left-most entry for each site.

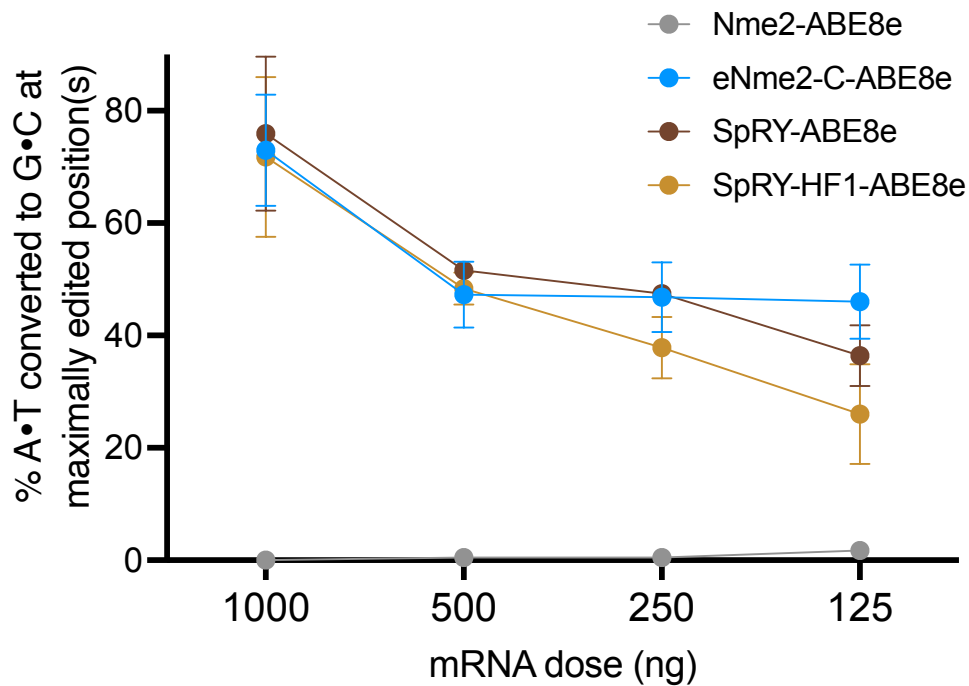

**Supplementary Figure 22. Dose-dependent adenine base editing activity in primary human dermal fibroblasts.** Dose titration of mRNA encoding Nme2-ABE8e, eNme2-C-ABE8e, SpRY-ABE8e, or SpRY-HF1-ABE8e electroporated into primary human dermal fibroblasts together with synthetic guide RNA targeting either the GCT-2 or CCG-1 site (**Supplementary Table 5**). Mean $\pm$ SEM is shown and reflects the average activity of one biological replicate measured for each dose targeting the two different endogenous genomic sites.

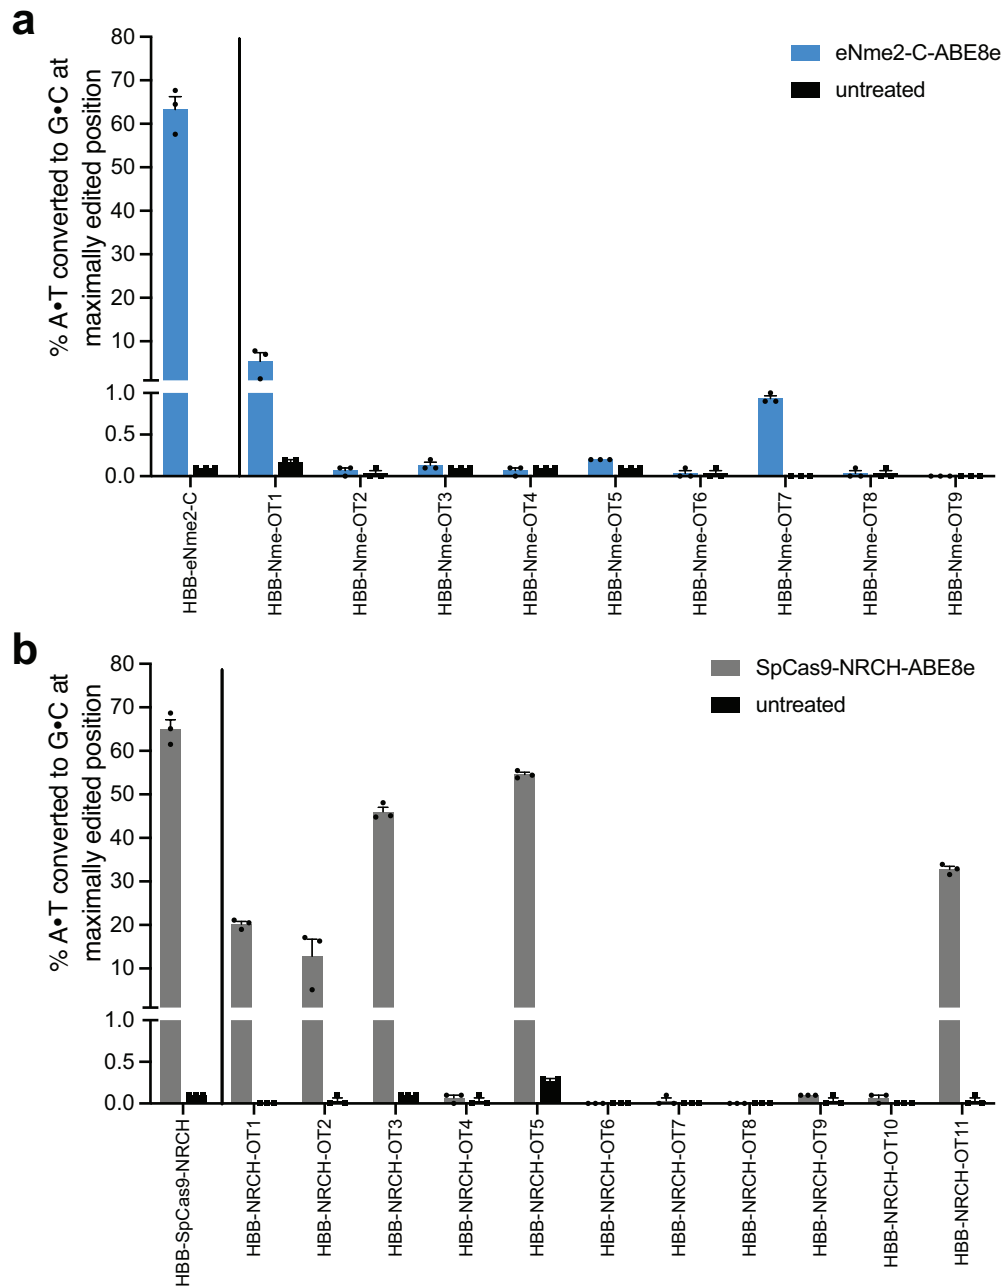

**Supplementary Figure 23. Off-target adenine base editing at in silico-predicted off-target sites for SpCas9-NRCH and eNme2-C sgRNAs targeting the *HBB* sickle-cell disease mutation. (a)** Off-target adenine base editing by eNme2-C-ABE8e at nine computationally nominated off-target sites for the sgRNA targeting the *HBB* sickle-cell disease mutation. **(b)** Off-target adenine base editing by SpCas9-NRCH-ABE8e at 11 computationally nominated off-target sites for the sgRNA targeting the *HBB* sickle-cell disease mutation. Mean±SEM is shown and reflects the average activity and standard error of the of  $n=3$  independent biological replicates measured at the maximally edited position within each given genomic site. On-target activity is shown at the left-most entry for each site.

**Supplementary Table 1. BE-PPA library editing data**  
(See the separately provided Excel file.)



**Supplementary Table 2. CHOPCHOPv3 identified off-target sites of protospacer-matched sgRNAs comparing eNme2-C to SpRY and SpRY-HF1**

| Target site or off-target site | Gene                | Protospacer sequence (5'-3'; top: Nme2Cas9, bottom: SpRY)                                            | PAM (top: Nme2Cas9; bottom: SpRY) | Mismatches (PAM proximal <sup>^</sup> ) (top: Nme2Cas9; bottom: SpRY) |
|--------------------------------|---------------------|------------------------------------------------------------------------------------------------------|-----------------------------------|-----------------------------------------------------------------------|
| Site 1                         | <i>PDCD1</i>        | GCAGATCCCACAGGCGCCCTGGC<br>GATCCCACAGGCGCCCTGGC                                                      | CAGTCG<br>CAG                     | –                                                                     |
| Site1-OT1                      | Intergenic          | GCA <b>tt</b> TCCCACAGGCGCCCTGGC<br><b>tt</b> TCCCACAGGCGCCCTGGC                                     | GATGCC<br>GAT                     | 2 (0)<br>2 (0)                                                        |
| Site 1-OT2                     | <i>PLCH2</i>        | <b>tg</b> AG <b>g</b> TCCCACAGG <b>cc</b> CCCTGGC<br>G <b>g</b> TCCCACAGG <b>cc</b> CCCTGGC          | GCAGCC<br>GCA                     | 4 (1)<br>2 (1)                                                        |
| Site 1-OT3                     | Intergenic          | <b>tgg</b> G <b>c</b> TCCCACAGG <b>cc</b> CCCTGGC<br>G <b>c</b> TCCCACAGG <b>cc</b> CCCTGGC          | CTCCCC<br>CTC                     | 5 (1)<br>2 (1)                                                        |
| Site 1-OT4                     | <i>TCF20</i>        | <b>ag</b> AGAT <b>a</b> CCACAGG <b>ca</b> CCCTGGC<br>GAT <b>a</b> CCACAGG <b>ca</b> CCCTGGC          | ATGATA<br>ATG                     | 4 (1)<br>2 (1)                                                        |
| Site 1-OT5                     | <i>CXXC5</i>        | GC <b>t</b> G <b>c</b> TCCC <b>a</b> gAGGCGCCCTGGC<br>G <b>c</b> TCCC <b>a</b> gAGGCGCCCTGGC         | TCTGCA<br>TCT                     | 3 (0)<br>2 (0)                                                        |
| Site 1-OT6*                    | Intergenic          | <b>ag</b> AGAT <b>ca</b> CCAGGCGCCCTGGC<br>GAT <b>ca</b> CCAGGCGCCCTGGC                              | TCATGC<br>TCA                     | 4 (0)<br>2 (0)                                                        |
| Site 1-OT7*                    | <i>SAPCD2P4</i>     | <b>tgg</b> GA <b>ccc</b> ACA <b>t</b> GCGCCCTGGC<br>GA <b>ccc</b> ACA <b>t</b> GCGCCCTGGC            | CGGGAC<br>CGG                     | 5 (0)<br>2 (0)                                                        |
| Site 2                         | <i>FANCF</i>        | GCTGCAGAAGGGATTCCATGAGG<br>GCAGAAGGGATTCCATGAGG                                                      | TGCGCG<br>TGC                     | –                                                                     |
| Site 2-OT1                     | <i>C11orf80</i>     | <b>tg</b> T <b>ga</b> AGAAGGG <b>t</b> TTCCATGAGG<br>G <b>a</b> AGAAGGG <b>t</b> TTCCATGAGG          | AGATAC<br>AGA                     | 4 (0)<br>2 (0)                                                        |
| Site 2-OT2                     | <i>ANO3</i>         | G <b>a</b> T <b>t</b> <b>c</b> TGAAGGGATTCCATGAGG<br><b>t</b> <b>c</b> TGAAGGGATTCCATGAGG            | TCTAAA<br>TCT                     | 3 (0)<br>2 (0)                                                        |
| Site 2-OT3                     | <i>MEAK7</i>        | <b>ca</b> T <b>g</b> AGAAGGGAT <b>c</b> CCATGAGG<br>G <b>g</b> AGAAGGGAT <b>c</b> CCATGAGG           | ACAAGG<br>ACA                     | 4 (1)<br>2 (1)                                                        |
| Site 2-OT4                     | Intergenic          | G <b>g</b> T <b>a</b> CAGAAGGG <b>c</b> TTCCATGAGG<br><b>a</b> CAGAAGGG <b>c</b> TTCCATGAGG          | CTGGGT<br>CTG                     | 3 (0)<br>2 (0)                                                        |
| Site 2-OT5                     | <i>SLC19A1</i>      | G <b>ga</b> GCAGAAGG <b>c</b> ATT <b>t</b> CATGAGG<br>GCAGAAGG <b>c</b> ATT <b>t</b> CATGAGG         | GGTCAA<br>GGT                     | 4 (1)<br>2 (1)                                                        |
| Site 2-OT6                     | <i>LOC105374492</i> | <b>cag</b> GCAGAA <b>agga</b> aTCCATGAGG<br>GCAGAA <b>agga</b> aTCCATGAGG                            | ACTCC<br>ACT                      | 5 (1)<br>2 (1)                                                        |
| Site 2-OT7                     | <i>MAP9</i>         | <b>aag</b> GCAGAT <b>tggg</b> ATTCC <b>t</b> TGAGG<br>GCAGAT <b>tggg</b> ATTCC <b>t</b> TGAGG        | TCTGGA<br>TCT                     | 5 (1)<br>2 (1)                                                        |
| Site 2-OT8                     | Intergenic          | <b>aag</b> GCAGAAGG <b>a</b> ATTCCATGAG <b>t</b><br>GCAGAAGG <b>a</b> ATTCCATGAG <b>t</b>            | TAAAGT<br>TAA                     | 5 (1)<br>2 (1)                                                        |
| Site 2-OT9                     | <i>RIPOR2</i>       | <b>ct</b> TGCT <b>ga</b> AGGGATT <b>ca</b> ATGAGG<br>G <b>c</b> T <b>ga</b> AGGGATT <b>ca</b> ATGAGG | TGCTAC<br>TGC                     | 4 (1)<br>2 (1)                                                        |
| Site 2-OT10                    | Intergenic          | G <b>ag</b> GCAG <b>g</b> AGGGATTCC <b>c</b> TGAGG<br>GCAG <b>g</b> AGGGATTCC <b>c</b> TGAGG         | AAGTGA<br>AAG                     | 4 (1)<br>2 (1)                                                        |
| Site 2-OT11                    | Intergenic          | <b>aga</b> GC <b>g</b> GAAGGGAT <b>g</b> CCATGAGG<br>GC <b>g</b> GAAGGGAT <b>g</b> CCATGAGG          | GATCCG<br>GAT                     | 5(1)<br>2(1)                                                          |
| Site 2-OT12*                   | Intergenic          | <b>aaa</b> G <b>g</b> AGAAGG <b>a</b> ATTCCATGAGG<br>G <b>g</b> AGAAGG <b>a</b> ATTCCATGAGG          | ATACAA<br>ATA                     | 5(0)<br>2(0)                                                          |

\*site did not sequence well (mixed bases) with HTS primers that were tried, see **Supplementary Table 8**. These sites were excluded from further analysis.

<sup>^</sup>PAM proximal defined as positions within 10 bases of the PAM

**Supplementary Table 3. GUIDE-Seq identified off-target sites**  
(See separately attached Excel file.)

**Supplementary Table 4. CHOPCHOPv3 identified off-target sites of protospacer-matched sgRNAs comparing eNme2-T.1 and eNme2-T.2 to SpRY and SpRY-HF1**

| Target site or off-target site | Gene                | Protospacer sequence (5'-3'; top: Nme2Cas9, bottom: SpRY) | PAM (top: Nme2Cas9; bottom: SpRY) | Mismatches (PAM proximal <sup>^</sup> ) (top: Nme2Cas9; bottom: SpRY) |
|--------------------------------|---------------------|-----------------------------------------------------------|-----------------------------------|-----------------------------------------------------------------------|
| Site 7                         | <i>GRIN2B</i>       | GTGGGCTGTAACAGGAGGGCCAG<br>GGCTGTAACAGGAGGGCCAG           | GAGATT<br>GAG                     | –                                                                     |
| Site 7-OT1                     | <i>SHANK2</i>       | aaGGGCTGcAgCAGGAGGGCCAG<br>GGCTGcAgCAGGAGGGCCAG           | GTGCTC<br>GTG                     | 4 (0)<br>2 (0)                                                        |
| Site 7-OT2                     | <i>PRPF40B</i>      | aaGGGCTGcAACAGGAGGGaCAG<br>GGCTGcAACAGGAGGGaCAG           | GGTACC<br>GGT                     | 4 (1)<br>2 (1)                                                        |
| Site 7-OT3                     | <i>ATP11A</i>       | GgtGGCTGTgACAGcAGGGCCAG<br>GGCTGTgACAGcAGGGCCAG           | GAGCAG<br>GAG                     | 4 (1)<br>2 (1)                                                        |
| Site 7-OT4                     | <i>TMEM63C</i>      | aaGGGCTGgAACtGGAGGGCCAG<br>GGCTGgAACtGGAGGGCCAG           | AACCAG<br>AAC                     | 4 (0)<br>2 (1)                                                        |
| Site 7-OT5                     | <i>AQP8</i>         | catGGCTcTAtcCAGGAGGGCCAG<br>GGCTcTAtcCAGGAGGGCCAG         | GTGACG<br>GTG                     | 5 (0)<br>2 (0)                                                        |
| Site 7-OT6                     | Intergenic          | GgaGGCTGTcACAGcAGGGCCAG<br>GGCTGTcACAGcAGGGCCAG           | CAGCTC<br>CAG                     | 4 (1)<br>2 (1)                                                        |
| Site 7-OT7                     | <i>UNC13D</i>       | agtGGCTGgAACAGGAaGGCCAG<br>GGCTGgAACAGGAaGGCCAG           | GAGGCA<br>GAG                     | 5 (1)<br>2 (1)                                                        |
| Site 7-OT8                     | <i>ZNF566</i>       | GgattCTGTAACAGGAGGGCCAG<br>ttCTGTAACAGGAGGGCCAG           | AGCACT<br>AGC                     | 4 (0)<br>2 (0)                                                        |
| Site 7-OT9                     | <i>SIX3</i>         | ctcGGCTGaAACAGGAGGGcGAG<br>GGCTGaAACAGGAGGGcGAG           | TACATG<br>TAC                     | 4 (1)<br>2 (1)                                                        |
| Site 7-OT10                    | Intergenic          | taGgaCTGaAACAGGAGGGCCAG<br>GaCTGaAACAGGAGGGCCAG           | GCAGAG<br>GCA                     | 4 (0)<br>2 (0)                                                        |
| Site 7-OT11                    | Intergenic          | tgaGcCTGTgACAGGAGGGCCAG<br>GcCTGTgACAGGAGGGCCAG           | CTGCCA<br>CTG                     | 5 (0)<br>2 (0)                                                        |
| Site 7-OT12                    | Intergenic          | ctTgAGCTGTcACAGGAGGGCCAG<br>aGCTGTcACAGGAGGGCCAG          | TGTCAA<br>TGT                     | 3 (0)<br>2 (0)                                                        |
| Site 7-OT13*                   | <i>SAPCD2P4</i>     | cTtGGCTGgAACAGGAGGaCCAG<br>GGCTGgAACAGGAGGaCCAG           | CCTTC<br>CCT                      | 4 (1)<br>2 (1)                                                        |
| Site 8                         | <i>SEC61B</i>       | ATATTGGAGATGAGGGTGGCAAG<br>TTGGAGATGAGGGTGGCAAG           | GCGCTG<br>GCG                     | –                                                                     |
| Site 8-OT1                     | <i>PIGR</i>         | cTATTGGgGATGAGGGTGGCAtG<br>TTGGgGATGAGGGTGGCAtG           | AGGAGG<br>AGG                     | 3 (1)<br>2 (1)                                                        |
| Site 8-OT2                     | Intergenic          | tacTTGGAGATgGGGTGGgAAG<br>TTGGAGATgGGGTGGgAAG             | GGCTTG<br>GGC                     | 5 (1)<br>2 (1)                                                        |
| Site 8-OT3                     | <i>TCF7L2</i>       | cgcTTGGcGATGAGGGTGGCAtG<br>TTGGcGATGAGGGTGGCAtG           | GCCAAG<br>GCC                     | 5 (1)<br>2 (1)                                                        |
| Site 8-OT4                     | <i>LOC100287189</i> | aTgcTGGAGATGAGGGTGGCAAG<br>cTGGAGATGAGGGTGGCAAG           | GAGCTG<br>GAG                     | 5 (1)<br>2 (1)                                                        |
| Site 8-OT5                     | Intergenic          | tTccTGGAGATGAGGGTGGgAAG<br>cTGGAGATGAGGGTGGgAAG           | GAAGTT<br>GAA                     | 4 (1)<br>2 (1)                                                        |
| Site 8-OT6                     | <i>ADAMTS15</i>     | gctTTGGtGATGAGGGTGGgAAG<br>TTGGtGATGAGGGTGGgAAG           | GGCTAA<br>GGC                     | 5 (1)<br>2 (1)                                                        |
| Site 8-OT7                     | Intergenic          | aTgTgGGAGATGAGGGTGGCAgG<br>TgGGAGATGAGGGTGGCAgG           | AGCGGA<br>AGC                     | 4 (1)<br>2 (1)                                                        |
| Site 8-OT8                     | Intergenic          | gccTTGGgGATGAGGGTGGgAAG<br>TTGGgGATGAGGGTGGgAAG           | CAGAAG<br>CAG                     | 5 (1)<br>2 (1)                                                        |
| Site 8-OT9                     | <i>FREM2</i>        | tgATaGtAGATGAGGGTGGCAAG<br>TaGtAGATGAGGGTGGCAAG           | GAAATA<br>GAA                     | 4 (0)<br>2 (0)                                                        |

|              |               |                                                                                             |               |                |
|--------------|---------------|---------------------------------------------------------------------------------------------|---------------|----------------|
| Site 8-OT10  | Intergenic    | <b>gg</b> AcTGGAGAT <b>g</b> GGGTGGCAAG<br>cTGGAGAT <b>g</b> GGGTGGCAAG                     | CAGGAA<br>CAG | 4 (0)<br>2 (0) |
| Site 8-OT11  | Intergenic    | <b>gat</b> TTaGAGATGAGGGT <b>g</b> cCAAG<br>TTaGAGATGAGGGT <b>g</b> cCAAG                   | GCTCAG<br>GCT | 5 (1)<br>2 (1) |
| Site 8-OT12  | <i>CMIP</i>   | <b>cTga</b> TGGAGATGAGGGTGGCA <b>g</b><br>aTGGAGATGAGGGTGGCA <b>g</b>                       | TCGGAG<br>TCG | 4 (1)<br>2 (1) |
| Site 8-OT13  | Intergenic    | <b>gag</b> TTGGAGcTgAGGGT <b>g</b> tCAAG<br>TTGGAGcTgAGGGT <b>g</b> tCAAG                   | GAAAGC<br>GAA | 5 (1)<br>2 (1) |
| Site 8-OT14  | <i>LGI4</i>   | <b>gc</b> ATTGGAGAT <b>c</b> GGGTGGCA <b>t</b><br>TTGGAGAT <b>c</b> GGGTGGCA <b>t</b>       | CTTTTT<br>CTT | 4 (1)<br>2 (1) |
| Site 8-OT15  | Intergenic    | <b>t</b> TATTGGAGAT <b>a</b> AGGGTGG <b>g</b> aAG<br>TTGGAGAT <b>a</b> AGGGTGG <b>g</b> aAG | AGCTCT<br>AGC | 3 (1)<br>2 (1) |
| Site 8-OT16  | Intergenic    | <b>ggc</b> TgGGAGA <b>a</b> GAGGGTGGCAAG<br>TgGGAGA <b>a</b> GAGGGTGGCAAG                   | GGAGGT<br>GGA | 5 (0)<br>2 (0) |
| Site 8-OT17* | Centromere    | <b>tTt</b> TTGaAGATGAGGGTGGCA <b>t</b><br>TTGaAGATGAGGGTGGCA <b>t</b>                       | GTCCCA<br>GTC | 4 (1)<br>2 (1) |
| Site 8-OT18  | Intergenic    | <b>tgg</b> TTaGAGATGAGGGT <b>g</b> tCAAG<br>TTaGAGATGAGGGT <b>g</b> tCAAG                   | AGGCAC<br>AGG | 5 (1)<br>2 (1) |
| Site 8-OT19* | <i>GRIA1</i>  | <b>ta</b> AaTGGAGATGAGGGTGG <b>a</b> aAG<br>aTGGAGATGAGGGTGG <b>a</b> aAG                   | ATGCAT<br>ATG | 4 (1)<br>2 (1) |
| Site 8-OT20  | <i>NCOA7</i>  | <b>cTcc</b> TGGAGATGAGGGTGGCA <b>a</b> g<br>cTGGAGATGAGGGTGGCA <b>a</b> g                   | GAAGGG<br>GAA | 4 (1)<br>2 (1) |
| Site 8-OT21  | <i>PDE1C</i>  | <b>Aag</b> TgGGAGATGAGGGTGGCAAG<br>TgGGAGATGAGGGTGGCAAG                                     | GCTTAC<br>GCT | 3 (0)<br>1 (0) |
| Site 8-OT22  | <i>PDE1C</i>  | <b>Aag</b> TgGGAGAT <b>c</b> GGGTGGCAAG<br>TgGGAGAT <b>c</b> GGGTGGCAAG                     | GTGGCG<br>GTG | 4 (0)<br>2 (0) |
| Site 8-OT23  | Intergenic    | <b>tcc</b> TTtGAGATGAGGGT <b>g</b> cCAAG<br>TTtGAGATGAGGGT <b>g</b> cCAAG                   | GAAATA<br>GAA | 5 (1)<br>2 (1) |
| Site 8-OT24* | Intergenic    | <b>tac</b> TTGGAGA <b>a</b> GAGGG <b>a</b> GGCAAG<br>TTGGAGA <b>a</b> GAGGG <b>a</b> GGCAAG | AGGTAG<br>AGG | 5 (1)<br>2 (1) |
| Site 8-OT25  | <i>DAP2IP</i> | <b>ggcc</b> TGGAGATGAGGGTGGCA <b>g</b><br>cTGGAGATGAGGGTGGCA <b>g</b>                       | CAGGCT<br>CAG | 5 (1)<br>2 (1) |
| Site 8-OT26* | <i>TTLL11</i> | <b>Agga</b> TGGAGATGAG <b>c</b> TGGCAAG<br>aTGGAGATGAG <b>c</b> TGGCAAG                     | TCTAAT<br>TCT | 4 (1)<br>2 (1) |
| Site 8-OT27  | Intergenic    | <b>Aa</b> ATTGG <b>cc</b> ATGAGGGTGGCAAG<br>TTGG <b>cc</b> ATGAGGGTGGCAAG                   | TCGGTC<br>TCG | 4 (0)<br>2 (0) |

\*site did not sequence well (mixed bases) with HTS primers that were tried, see **Supplementary Table 8**. These sites were excluded from further analysis.

^PAM proximal defined as positions within 10 bases of the PAM

**Supplementary Table 5. List of target sites**  
(See separately attached Excel file.)

**Supplementary Table 6. CHOPCHOPv3-identified off-target sites of sgRNAs targeting the *HBB* sickle-cell disease mutation**

| Target site or off-target site | Gene                | Protospacer sequence (5' to 3')                   | PAM    | Mismatches (PAM proximal <sup>^</sup> ) | Previously validated?  |
|--------------------------------|---------------------|---------------------------------------------------|--------|-----------------------------------------|------------------------|
| HBB-eNme2-C                    | <i>HBB</i>          | AGACTTCTCCACAGGAGTCAGGT                           | GCACCA | –                                       |                        |
| HBB-Nme-OT1                    | <i>HBB</i>          | AGACTTCTCC <b>t</b> CAGGAGTCAG <b>a</b> T         | GCACCA | 2(1)                                    | Overlaps HBB-NRCH-OT2  |
| HBB-Nme-OT2                    | Intergenic          | <b>tt</b> ACTTCTCCACAG <b>c</b> AGTCAGGT          | TTTGAT | 3 (1)                                   |                        |
| HBB-Nme-OT3                    | <i>CNTN5</i>        | <b>Aa</b> ACTTCTCCAC <b>t</b> GGAGTCAG <b>g</b>   | CAGGAG | 3 (1)                                   |                        |
| HBB-Nme-OT4                    | Intergenic          | <b>gag</b> CTTCT <b>t</b> CACA <b>a</b> GAGTCAGGT | AACCTA | 5 (1)                                   |                        |
| HBB-Nme-OT5                    | <i>CGNL1</i>        | <b>ccct</b> TTCTCCACAGGAGTCAG <b>a</b>            | GAGACA | 5 (1)                                   | Overlaps HBB-NRCH-OT3  |
| HBB-Nme-OT6                    | <i>NUP50</i>        | <b>tc</b> ACTTCTCCAGAG <b>gt</b> TCAGGT           | AACTAA | 3 (1)                                   |                        |
| HBB-Nme-OT7                    | Intergenic          | <b>ctg</b> CTTCTCCA <b>ca</b> AAGAGTCAGGT         | ATCACT | 5(1)                                    |                        |
| HBB-Nme-OT8                    | Intergenic          | <b>Aagt</b> TTCTCCAGAGGAGTCAGGT                   | TAGGAG | 3(0)                                    | Overlaps HBB-NRCH-OT10 |
| HBB-Nme-OT9                    | Intergenic          | <b>ctt</b> CTTCTCCA <b>t</b> AGGAGTCAG <b>a</b> T | GTGATG | 5(1)                                    | Overlaps HBB-NRCH-OT11 |
| HBB-SpCas9-NRCH                | <i>HBB</i>          | TTCTCCACAGGAGTCAGGTG                              | CAC    | –                                       |                        |
| HBB-NRCH-OT1                   | <i>TET1</i>         | <b>Taa</b> TCCACAGGAGTCAGGTG                      | CAC    | 2(0)                                    | Y <sup>4</sup>         |
| HBB-NRCH-OT2                   | <i>HBB</i>          | TTCTCC <b>t</b> CAGGAGTCAG <b>a</b> TG            | AGA    | 2(1)                                    | Y <sup>4</sup>         |
| HBB-NRCH-OT3                   | <i>CGNL1</i>        | TTCTCCACAGGAGTCAG <b>a</b> G                      | ATA    | 1(1)                                    |                        |
| HBB-NRCH-OT4                   | <i>PCSK6</i>        | TTCTCCA <b>g</b> AGGAGTCAG <b>g</b> G             | GGT    | 2(1)                                    | Y <sup>4</sup>         |
| HBB-NRCH-OT5                   | <i>CFDP1</i>        | <b>c</b> TC <b>c</b> CCACAGGAGTCAGGTG             | CCT    | 2(0)                                    | Y <sup>4</sup>         |
| HBB-NRCH-OT6                   | <i>ETFB</i>         | TTCTCC <b>t</b> CAGGAGTCAG <b>a</b> G             | GGC    | 2(1)                                    | Y <sup>4</sup>         |
| HBB-NRCH-OT7                   | Intergenic          | TTCTCC <b>c</b> CAGGAG <b>c</b> CAGGTG            | GCC    | 2(1)                                    | Y <sup>4</sup>         |
| HBB-NRCH-OT8                   | <i>LOC105377396</i> | TTCT <b>g</b> CACAGGAGTCA <b>t</b> GTG            | AAG    | 2(1)                                    | Y <sup>4</sup>         |
| HBB-NRCH-OT9                   | <i>LOC105374898</i> | TTCTCC <b>c</b> <b>g</b> GGAGTCAGGTG              | CAC    | 2(0)                                    | Y <sup>4</sup>         |
| HBB-NRCH-OT10                  | Intergenic          | TTCTCCA <b>g</b> AGGAGTCAGGT <b>t</b>             | AGG    | 2(1)                                    |                        |
| HBB-NRCH-OT11                  | Intergenic          | TTCTCCA <b>t</b> AGGAGTCAG <b>a</b> TG            | TGA    | 2(1)                                    | Y <sup>4</sup>         |

**Supplementary Table 7. Plasmids and selection phage (SP) used in this work**

| Name                   | Usage (resistance)                                                | Origin | ORF1 (prom [RBS] genes)                                                                                                                             | ORF2 (prom [RBS] genes)                  |
|------------------------|-------------------------------------------------------------------|--------|-----------------------------------------------------------------------------------------------------------------------------------------------------|------------------------------------------|
| pTPH353e               | AP validation (carb <sup>R</sup> )                                | SC101  | P <sub>psp</sub> <sup>5</sup> [SD8 <sup>6</sup> ] gIII(1-18)-NpuN-32aa linker-NpuC-gIII(18-425), luxAB                                              |                                          |
| pTPH353e-d             | AP validation (carb <sup>R</sup> )                                | SC101  | P <sub>psp</sub> <sup>5</sup> [SD8 <sup>6</sup> ] gIII(1-18)-NpuN-32aa linker-NpuC(C1A)-gIII(18-425), luxAB                                         |                                          |
| pTPH353e-d stops       | AP validation (carb <sup>R</sup> )                                | SC101  | P <sub>psp</sub> <sup>5</sup> [SD8 <sup>6</sup> ] gIII(1-18)-NpuN-32aa linker (double stop codon)-NpuC-gIII(18-425), luxAB                          |                                          |
| pTPH401                | AP validation (carb <sup>R</sup> )                                | ColE1  | P <sub>ProC</sub> <sup>7</sup> [sd8 <sup>6</sup> ] gIII(1-18)-NpuN-64aa linker(Evo-1 protospacer, NNNNCC PAM)-NpuC-gIII(18-425), luxAB              | P <sub>lac</sub> Evo-1 sgRNA             |
| pTPH400                | AP validation (carb <sup>R</sup> )                                | ColE1  | P <sub>ProC</sub> <sup>7</sup> [sd8 <sup>6</sup> ] gIII(1-18)-NpuN-121aa linker(Evo-1 protospacer, NNNNCC PAM)-NpuC-gIII(18-425), luxAB             | P <sub>lac</sub> Evo-1 sgRNA             |
| pTPH397                | AP validation (carb <sup>R</sup> )                                | ColE1  | P <sub>ProC</sub> <sup>7</sup> [sd8 <sup>6</sup> ] gIII(1-18)-NpuN-32aa linker(Evo-1 protospacer, NNNNCC PAM)-NpuC-gIII(18-425), luxAB              | P <sub>lac</sub> Evo-1 sgRNA             |
| pTPH397b               | AP validation (carb <sup>R</sup> )                                | ColE1  | P <sub>ProC</sub> <sup>7</sup> [sd8 <sup>6</sup> ] gIII(1-18)-NpuN-32aa linker(Evo-2 protospacer, NNNNCC PAM)-NpuC-gIII(18-425), luxAB              | P <sub>lac</sub> Evo-2 sgRNA             |
| pTPH397c               | AP validation (carb <sup>R</sup> )                                | ColE1  | P <sub>ProC</sub> <sup>7</sup> [sd8 <sup>6</sup> ] gIII(1-18)-NpuN-32aa linker(Evo-3 protospacer, NNNNCC PAM)-NpuC-gIII(18-425), luxAB              | P <sub>lac</sub> Evo-3 sgRNA             |
| pTPH405b               | AP: ePACE1-2 (carb <sup>R</sup> )                                 | ColE1  | P <sub>ProC</sub> <sup>7</sup> [sd8 <sup>6</sup> ] gIII(1-18)-NpuN-32aa linker(Evo-2 protospacer, varied PAMs)-NpuC-gIII(18-425), luxAB             | P <sub>lac</sub> Evo-2 sgRNA             |
| pTPH405c               | AP: ePACE3 (carb <sup>R</sup> )                                   | ColE1  | P <sub>ProC</sub> <sup>7</sup> [sd8 <sup>6</sup> ] gIII(1-18 recoded)-NpuN-32aa linker(Evo-2 protospacer, varied PAMs)-NpuC-gIII(18-425), luxAB     | P <sub>lac</sub> Evo-2 sgRNA             |
| pTPH412 WT sd8         | CP validation (kan <sup>R</sup> )                                 | SC101  | P <sub>psp</sub> <sup>5</sup> [sd8 <sup>6</sup> ] TadABE8e-gp41-8N                                                                                  |                                          |
| pTPH412 WT sd2         | CP validation (kan <sup>R</sup> )                                 | SC101  | P <sub>psp</sub> <sup>5</sup> [sd2 <sup>6</sup> ] TadABE8e-gp41-8N                                                                                  |                                          |
| pTPH412 R26G sd8       | CP: ePACE3-5 (kan <sup>R</sup> )                                  | SC101  | P <sub>psp</sub> <sup>5</sup> [sd8 <sup>6</sup> ] TadABE8e(R26G)-gp41-8N                                                                            |                                          |
| pTPH412 R26G sd2       | CP validation (kan <sup>R</sup> )                                 | SC101  | P <sub>psp</sub> <sup>5</sup> [sd2 <sup>6</sup> ] TadABE8e(R26G)-gp41-8N                                                                            |                                          |
| pTPH418b               | AP: ePACE4-5 (carb <sup>R</sup> )                                 | ColE1  | P <sub>ProC</sub> <sup>7</sup> [sd8 <sup>6</sup> ] gIII(1-18 recoded)-NpuN-45aa linker(2 x Evo-4 protospacer, varied PAMs)-NpuC-gIII(18-425), luxAB | P <sub>lac</sub> Evo-4 sgRNA             |
| pTPH343c               | CBE-PPA (spec <sup>R</sup> )                                      | ColE1  | P <sub>BAD</sub> [SD8 <sup>6</sup> ] rAPOBEC1-dSpCas9-UGI                                                                                           | P <sub>lac</sub> CBE-PPA sgRNA           |
| pTPH342                | CBE-PPA library (carb <sup>R</sup> )                              | SC101  | CBE-PPA protospacer                                                                                                                                 | P <sub>Pro1</sub> [SD8] sfGFP (inactive) |
| pTPH413                | ABE-PPA (cm <sup>R</sup> )                                        | p15A   | P <sub>BAD</sub> [sd4u <sup>6</sup> ] TadABE8e-dNme2Cas9 variant                                                                                    | P <sub>lac</sub> ABE-PPA sgRNA           |
| pTPH424                | ABE-PPA library (carb <sup>R</sup> )                              | SC101  | ABE-PPA protospacer                                                                                                                                 | P <sub>Pro1</sub> [SD8] sfGFP (inactive) |
| Nme-IVT                | IVT template (carb <sup>R</sup> )                                 | pUC    | P <sub>T7(mutated)</sub> <sup>8</sup> Nme2ABE8e variant                                                                                             |                                          |
| SpRY-IVT               | IVT template (carb <sup>R</sup> )                                 | pUC    | P <sub>T7(mutated)</sub> <sup>8</sup> SpRYABE8e or SpRY-HF1-ABE8e variant                                                                           |                                          |
| Nme sgRNA              | Mammalian guide expression (carb <sup>R</sup> )                   | pUC    | P <sub>Hu6</sub> Nme2Cas9 sgRNA                                                                                                                     |                                          |
| SpRY sgRNA             | Mammalian guide expression (carb <sup>R</sup> )                   | pUC    | P <sub>Hu6</sub> SpRY/SpRY-HF1 sgRNA                                                                                                                |                                          |
| Nme2ABE8e variants     | Mammalian expression of adenine base editor (carb <sup>R</sup> )  | pUC    | P <sub>CMV</sub> Nme2ABE8e variant                                                                                                                  |                                          |
| SpRYABE8e variants     | Mammalian expression of adenine base editor (carb <sup>R</sup> )  | pUC    | P <sub>CMV</sub> SpRY/SpRY-HF1-ABE8e variant                                                                                                        |                                          |
| Nme2BE4 variants       | Mammalian expression of cytosine base editor (carb <sup>R</sup> ) | pUC    | P <sub>CMV</sub> Nme2BE4 variant                                                                                                                    |                                          |
| SpRYBE4 variants       | Mammalian expression of adenine base editor (carb <sup>R</sup> )  | pUC    | P <sub>CMV</sub> SpRY/SpRY-HF1-BE4 variant                                                                                                          |                                          |
| Nme2 nuclease variants | Mammalian expression of nuclease (carb <sup>R</sup> )             | pUC    | P <sub>CMV</sub> Nme2Cas9 nuclease variant                                                                                                          |                                          |
| SpRY nuclease variants | Mammalian expression of nuclease (carb <sup>R</sup> )             | pUC    | P <sub>CMV</sub> SpRY/SpRY-HF1 nuclease variant                                                                                                     |                                          |
| SP391c                 | ePACE1-2, ΔgIII SP, backbone recoded <sup>9</sup>                 | M13 f1 | P <sub>gIII</sub> [SD4 <sup>4</sup> ] TadABE8e-dNme2Cas9 variant                                                                                    |                                          |
| SP404                  | ePACE3-5, ΔgIII SP, backbone recoded <sup>9</sup>                 | M13 f1 | P <sub>gIII</sub> [SD4 <sup>4</sup> ] gp41-C-dNme2Cas9 variant                                                                                      |                                          |

**Supplementary Table 8. Primers used in this work**

| <b>Amplicon</b>                                      | <b>Fw (5'-3')</b>                                                            | <b>Rv (5'-3')</b>                                                 | <b>Purpose</b>                                                                                                            |
|------------------------------------------------------|------------------------------------------------------------------------------|-------------------------------------------------------------------|---------------------------------------------------------------------------------------------------------------------------|
| SP backbone                                          | CACCGTTCATCTGTCCTCTTT                                                        | CGACCTGCTCCATGTTACTTAG                                            | qPCR estimation of SP titer                                                                                               |
| SP insert                                            | TAATGGAAACTTCTCATGAAAAAGTC<br>TTTAG                                          | ACAGAGAGAATAACATAAAACAGGG<br>AAGC                                 | PCR amplification of SP insert for<br>Sanger sequencing                                                                   |
| BE-PPA library<br>insert                             | ACACTCTTTCCCTACACGACGCTCTT<br>CCGATCTNNNNCAATACGCAACGCCT<br>CTC              | TGGAGTTCAGACGTGTGCTCTTCCG<br>ATCCTTGCTGTGAAGCGGATGC               | HTS of BE-PPA libraries (both CBE<br>and ABE-PPE)                                                                         |
| CBE-PPA 5N oligo<br>library (1,024<br>members)       | AGACTGAGCACGUGANNNNNTTAAG<br>CCAGCCCCGACAC                                   | ACGTGCTCAGTCUGGGCCATTGCGT<br>TGCGCTCACTG                          | Cloning of 5N library for CBE-PPE<br>validation                                                                           |
| ABE-PPA pseudo-<br>7N oligo library<br>(512 members) | AAAGNNNNNNNNNNNNNNNACGCAA<br>TGGCCAGACTGAGCACGTGANNNN<br>NNNTTAAGCCAGCCCCGAC | CCAGTCGGGAAACCTGTGC                                               | KLD cloning of ABE-PPE library,<br>first set of Ns replaced by UMI<br>tag(s), second set of Ns replaced by<br>target PAMs |
| HTS-1 genomic site                                   | ACACTCTTTCCCTACACGACGCTCTT<br>CCGATCTNNNNATTGCTCTTTCTCC<br>GCCCA             | TGGAGTTCAGACGTGTGCTCTTCCG<br>ATCTTTCACAAAACAGGGGTGGCT             | HTS of genomic target site, see<br><b>Supplementary Table 5.</b>                                                          |
| HTS-2 genomic site                                   | ACACTCTTTCCCTACACGACGCTCTT<br>CCGATCTNNNNGCTCAGAAAAAGGG<br>CCCTGA            | TGGAGTTCAGACGTGTGCTCTTCCG<br>ATCTGAGATTCAGTGTGGTGGGG              | ""                                                                                                                        |
| HTS-3 genomic site                                   | ACACTCTTTCCCTACACGACGCTCTT<br>CCGATCTNNNNACTTTCTATCCGTC<br>CGCGT             | TGGAGTTCAGACGTGTGCTCTTCCG<br>ATCTGGCTGTAGAGGGAGACAAGC             | ""                                                                                                                        |
| HTS-4 genomic site                                   | ACACTCTTTCCCTACACGACGCTCTT<br>CCGATCTNNNNGACGTCTTCTCCTGT<br>GGTGG            | TGGAGTTCAGACGTGTGCTCTTCCG<br>ATCTGGGTGTCTGGCTGGAATCTC             | ""                                                                                                                        |
| HTS-5 genomic site                                   | ACACTCTTTCCCTACACGACGCTCTT<br>CCGATCTNNNNGGCCTGGAAGTTC<br>GCTAAT             | TGGAGTTCAGACGTGTGCTCTTCCG<br>ATCTTGGATCGCTTTTCCGAGCTT             | ""                                                                                                                        |
| HTS-6 genomic site                                   | ACACTCTTTCCCTACACGACGCTCTT<br>CCGATCTNNNNGGCTCCCTCTCCAG<br>TTACCG            | TGGAGTTCAGACGTGTGCTCTTCCG<br>ATCTCACCACCATCCGCTCTGCC              | ""                                                                                                                        |
| HTS-7 genomic site                                   | ACACTCTTTCCCTACACGACGCTCTT<br>CCGATCTNNNNGGACTCAGTTCCAA<br>CCCAAATGC         | TGGAGTTCAGACGTGTGCTCTTCCG<br>ATCTGGCATCCACAAATCACCTGGA<br>GAG     | ""                                                                                                                        |
| HTS-8 genomic site                                   | ACACTCTTTCCCTACACGACGCTCTT<br>CCGATCTNNNNGAACCCAGGTAGCC<br>AGAGAC            | TGGAGTTCAGACGTGTGCTCTTCCG<br>ATCTTCTTTCAACCCGAACGGAG              | ""                                                                                                                        |
| HTS-9 genomic site                                   | ACACTCTTTCCCTACACGACGCTCTT<br>CCGATCTNNNNCCTTCTCTGCCAT<br>CACGTGC            | TGGAGTTCAGACGTGTGCTCTTCCG<br>ATCTCCTAGAAAGGCATGGATGAGA<br>GAAGC   | ""                                                                                                                        |
| HTS-10 genomic<br>site                               | ACACTCTTTCCCTACACGACGCTCTT<br>CCGATCTNNNNCCAAGTTTGGGCTC<br>CAGTATGGTC        | TGGAGTTCAGACGTGTGCTCTTCCG<br>ATCTGCCACCTGGTTTATGGGATTT<br>GTTACAG | ""                                                                                                                        |
| HTS-11 genomic<br>site                               | ACACTCTTTCCCTACACGACGCTCTT<br>CCGATCTNNNNGGCGAGGCAGAGGG<br>TCCAAA            | TGGAGTTCAGACGTGTGCTCTTCCG<br>ATCTCTCTTCTGGGGCCTTTTCCC             | ""                                                                                                                        |
| HTS-12 genomic<br>site                               | ACACTCTTTCCCTACACGACGCTCTT<br>CCGATCTNNNNCCCCCGCACTCCTTC<br>TTC              | TGGAGTTCAGACGTGTGCTCTTCCG<br>ATCTAATCTACCTCCGCGGACCT              | ""                                                                                                                        |
| HTS-13 genomic<br>site                               | ACACTCTTTCCCTACACGACGCTCTT<br>CCGATCTNNNNGCGCACCTCATGGAA<br>TCCCTTC          | TGGAGTTCAGACGTGTGCTCTTCCG<br>ATCTCTTGCTCCACTGGTTGTGCA<br>G        | ""                                                                                                                        |
| HTS-14 genomic<br>site                               | ACACTCTTTCCCTACACGACGCTCTT<br>CCGATCTNNNNGGCACTGTAGTT<br>TAGTGATCCC          | TGGAGTTCAGACGTGTGCTCTTCCG<br>ATCTACCTTGACCCCTCCACCAG              | ""                                                                                                                        |
| HTS-15 genomic<br>site                               | ACACTCTTTCCCTACACGACGCTCTT<br>CCGATCTNNNNCATTCCCTCTTAGC<br>CAGAGCCGG         | TGGAGTTCAGACGTGTGCTCTTCCG<br>ATCTCAGATCTATTGGAATCCTGGA<br>GTGACC  | ""                                                                                                                        |
| HTS-16 genomic<br>site                               | ACACTCTTTCCCTACACGACGCTCTT<br>CCGATCTNNNNCAGCAGCTGAACAAG<br>GACAC            | TGGAGTTCAGACGTGTGCTCTTCCG<br>ATCTAAGGAGGAACAGGAGAGCCA             | ""                                                                                                                        |
| HTS-17 genomic<br>site                               | ACACTCTTTCCCTACACGACGCTCTT<br>CCGATCTNNNNCAGTGAATCACCCCT<br>GGGGGATCA        | TGGAGTTCAGACGTGTGCTCTTCCG<br>ATCTGAGGTGGGGTTAAAGCGGA<br>G         | ""                                                                                                                        |
| HTS-18 genomic<br>site                               | ACACTCTTTCCCTACACGACGCTCTT<br>CCGATCTNNNNGCTGTTTTCCCTCT<br>GAGCTATCG         | TGGAGTTCAGACGTGTGCTCTTCCG<br>ATCTCCAGCTCTGTGGGAAGCAACT<br>G       | ""                                                                                                                        |



|                         |                                                                          |                                                                  |                                                                  |
|-------------------------|--------------------------------------------------------------------------|------------------------------------------------------------------|------------------------------------------------------------------|
| HTS-19 genomic site     | ACACTCTTTCCCTACACGACGCTCTT<br>CCGATCTNNNNGCTCCTCTCTGTTTG<br>GCCTT        | TGGAGTTCAGACGTGTGCTCTTCCG<br>ATCTCAGCGTCTGCAAAGAGGAGA            | ""                                                               |
| HTS-20 genomic site     | ACACTCTTTCCCTACACGACGCTCTT<br>CCGATCTNNNNGCTCCTGAAAATGCA<br>CCCTCTTCT    | TGGAGTTCAGACGTGTGCTCTTCCG<br>ATCTGGTGCATTTTTTAATAGGGCTT<br>GGGG  | ""                                                               |
| HTS-21 genomic site     | ACACTCTTTCCCTACACGACGCTCTT<br>CCGATCTNNNNGGACCTTATCTCCTT<br>TCATTGAGCACC | TGGAGTTCAGACGTGTGCTCTTCCG<br>ATCTCATACTCGCATGGCTACCTGG<br>AC     | ""                                                               |
| HTS-22 genomic site     | ACACTCTTTCCCTACACGACGCTCTT<br>CCGATCTNNNNGGGGCTCCTGAGT<br>TTCTCATCTG     | TGGAGTTCAGACGTGTGCTCTTCCG<br>ATCTGGTTGCCACCCCTAGTCATTG<br>GAG    | ""                                                               |
| HTS-23 genomic site     | ACACTCTTTCCCTACACGACGCTCTT<br>CCGATCTNNNNGGAATAGCACCAGAA<br>TGTTCCGAGGC  | TGGAGTTCAGACGTGTGCTCTTCCG<br>ATCTGCCTACACTTAAAACTTGACG<br>TGGG   | ""                                                               |
| HTS-24 genomic site     | ACACTCTTTCCCTACACGACGCTCTT<br>CCGATCTNNNNGGAAAAGAGGTTGTG<br>AGTGGTCCAG   | TGGAGTTCAGACGTGTGCTCTTCCG<br>ATCTAGAATGCAGGGCTTGTGACT<br>TATAGC  | ""                                                               |
| HTS-25 genomic site     | ACACTCTTTCCCTACACGACGCTCTT<br>CCGATCTNNNNGGTGGAAGGTCCCT<br>CCAGA         | TGGAGTTCAGACGTGTGCTCTTCCG<br>ATCTCCTTCAACCTGACCTGGGAC            | ""                                                               |
| HTS-26 genomic site     | ACACTCTTTCCCTACACGACGCTCTT<br>CCGATCTNNNNGGTAGTGCTTGAGAC<br>CGCCAG       | TGGAGTTCAGACGTGTGCTCTTCCG<br>ATCTCCCTCCACTAAGAAGAACCTC<br>TTTGTG | ""                                                               |
| HTS-27 genomic site     | ACACTCTTTCCCTACACGACGCTCTT<br>CCGATCTNNNNCACACTCCCAGCTTC<br>ACCTC        | TGGAGTTCAGACGTGTGCTCTTCCG<br>ATCTTCGTCCAACCTCAGCCTTGTC           | ""                                                               |
| HTS-28 genomic site     | ACACTCTTTCCCTACACGACGCTCTT<br>CCGATCTNNNNGCTAGACGGTAGA<br>GCCTACTGC      | TGGAGTTCAGACGTGTGCTCTTCCG<br>ATCTCCATTGCAACTCCAGTCCT<br>GC       | ""                                                               |
| HTS-29 genomic site     | ACACTCTTTCCCTACACGACGCTCTT<br>CCGATCTNNNNGGAATAGCACCAGAA<br>TGTTCCGAGGC  | TGGAGTTCAGACGTGTGCTCTTCCG<br>ATCTGCCTACACTTAAAACTTGACG<br>TGGG   | ""                                                               |
| HTS-30 genomic site     | ACACTCTTTCCCTACACGACGCTCTT<br>CCGATCTNNNNGCCACACCCTAGGG<br>TTG           | TGGAGTTCAGACGTGTGCTCTTCCG<br>ATCTGGGAAAATAGACCAATAGGCA<br>G      | ""                                                               |
| Site 1-OT1 genomic site | ACACTCTTTCCCTACACGACGCTCTT<br>CCGATCTNNNNTCACAAGCTCGGTGG<br>TTCAA        | TGGAGTTCAGACGTGTGCTCTTCCG<br>ATCTAAAACCCTGTGTGCTCCTGA            | HTS of genomic target site, see<br><b>Supplementary Table 2.</b> |
| Site 1-OT2 genomic site | ACACTCTTTCCCTACACGACGCTCTT<br>CCGATCTNNNNGGCCCTCAGAGACC<br>CTTTTT        | TGGAGTTCAGACGTGTGCTCTTCCG<br>ATCTAGGGAGAGACTGGATGGTGG            | ""                                                               |
| Site 1-OT3 genomic site | ACACTCTTTCCCTACACGACGCTCTT<br>CCGATCTNNNNTCAGCCACCCAACA<br>TGCTA         | TGGAGTTCAGACGTGTGCTCTTCCG<br>ATCTCACAGTCCAGTTGAGGAGGC            | ""                                                               |
| Site 1-OT4 genomic site | ACACTCTTTCCCTACACGACGCTCTT<br>CCGATCTNNNNGCCAGCTCCACTCCA<br>CTTTC        | TGGAGTTCAGACGTGTGCTCTTCCG<br>ATCTCCCAGGCCTAACATACCC              | ""                                                               |
| Site 1-OT5 genomic site | ACACTCTTTCCCTACACGACGCTCTT<br>CCGATCTNNNNGCCCAGAGCTGAGT<br>AATGCT        | TGGAGTTCAGACGTGTGCTCTTCCG<br>ATCTGCCTCTGTCTGTGACTCCC             | ""                                                               |
| Site 1-OT6 genomic site | ACACTCTTTCCCTACACGACGCTCTT<br>CCGATCTNNNNTTAAGGTGATCCTC<br>CCGCT         | TGGAGTTCAGACGTGTGCTCTTCCG<br>ATCTCCACACAAGAAGAGGAGGGG            | ""                                                               |
| Site 1-OT7 genomic site | ACACTCTTTCCCTACACGACGCTCTT<br>CCGATCTNNNNTGGGGCTTCTCTCC<br>AGG           | TGGAGTTCAGACGTGTGCTCTTCCG<br>ATCTGGTGCTGGAGGGCTTGTG              | ""                                                               |
| Site 2-OT1 genomic site | ACACTCTTTCCCTACACGACGCTCTT<br>CCGATCTNNNNGCTGAAGCTGAGGC<br>AGTAGG        | TGGAGTTCAGACGTGTGCTCTTCCG<br>ATCTCTAGGAGGGGATGCAGACCT            | ""                                                               |
| Site 2-OT2 genomic site | ACACTCTTTCCCTACACGACGCTCTT<br>CCGATCTNNNNTGGACTTGAATGTG<br>TTCACAT       | TGGAGTTCAGACGTGTGCTCTTCCG<br>ATCTAGACCTTCAAACGGTAAAGTC<br>CA     | ""                                                               |
| Site 2-OT3 genomic site | ACACTCTTTCCCTACACGACGCTCTT<br>CCGATCTNNNNCAGCTTCCGAGGTCA<br>AGAGG        | TGGAGTTCAGACGTGTGCTCTTCCG<br>ATCTTGCTGAAACCCAGTGAAGCA            | ""                                                               |
| Site 2-OT4 genomic site | ACACTCTTTCCCTACACGACGCTCTT<br>CCGATCTNNNNGCCTTGGCCTTCTG<br>ATAGCA        | TGGAGTTCAGACGTGTGCTCTTCCG<br>ATCTTGGGTGACAAAAGGGGACTC            | ""                                                               |
| Site 2-OT5 genomic site | ACACTCTTTCCCTACACGACGCTCTT<br>CCGATCTNNNNGCCCTCCACTAAGAG<br>CAGAG        | TGGAGTTCAGACGTGTGCTCTTCCG<br>ATCTTGATTGTGCTCGTCCCACG             | ""                                                               |

|                                              |                                                                    |                                                                                                                                                                                                           |                                                        |
|----------------------------------------------|--------------------------------------------------------------------|-----------------------------------------------------------------------------------------------------------------------------------------------------------------------------------------------------------|--------------------------------------------------------|
| Site 2-OT6 genomic site                      | ACACTCTTTCCCTACACGACGCTCTT<br>CCGATCTNNNNGTGAAGGCACCAGTA<br>CTCGT  | TGGAGTTCAGACGTGTGCTCTTCCG<br>ATCTTGCTTCTCAGTCAGTGGCTG                                                                                                                                                     | ""                                                     |
| Site 2-OT7 genomic site                      | ACACTCTTTCCCTACACGACGCTCTT<br>CCGATCTNNNNCAAGTGATCTGCCA<br>CCTCA   | TGGAGTTCAGACGTGTGCTCTTCCG<br>ATCTAACTTAACCAAGAAGGCCAGG<br>T                                                                                                                                               | ""                                                     |
| Site 2-OT8 genomic site                      | ACACTCTTTCCCTACACGACGCTCTT<br>CCGATCTNNNNACCTCCTCCCTGGGA<br>TGAAA  | TGGAGTTCAGACGTGTGCTCTTCCG<br>ATCTCGTCAACCGTGGGAATGTTT                                                                                                                                                     | ""                                                     |
| Site 2-OT9 genomic site                      | ACACTCTTTCCCTACACGACGCTCTT<br>CCGATCTNNNNTTCTACCTCTGCCA<br>CTTGC   | TGGAGTTCAGACGTGTGCTCTTCCG<br>ATCTCCCCCTTCTCTATGCCA                                                                                                                                                        | ""                                                     |
| Site 2-OT10 genomic site                     | ACACTCTTTCCCTACACGACGCTCTT<br>CCGATCTNNNNTCTGCTCCATTACA<br>GCTGC   | TGGAGTTCAGACGTGTGCTCTTCCG<br>ATCTGGGTGCAGGTCTGAATCAC                                                                                                                                                      | ""                                                     |
| Site 2-OT11 genomic site                     | ACACTCTTTCCCTACACGACGCTCTT<br>CCGATCTNNNNAGAGTGACTGTGGA<br>GGGGAG  | TGGAGTTCAGACGTGTGCTCTTCCG<br>ATCTTGACAGTACCCGTGATATGGT<br>C                                                                                                                                               | ""                                                     |
| Site 2-OT12 genomic site                     | ACACTCTTTCCCTACACGACGCTCTT<br>CCGATCTNNNNCCTGATGCCTGGGAA<br>GTGAA  | TGGAGTTCAGACGTGTGCTCTTCCG<br>ATCTGCATTTAGCCCTTCACTCCT                                                                                                                                                     | ""                                                     |
| Transcript for <i>in vitro</i> transcription | TCGAGCTCGGTACCTAATACGACTCA<br>CTATAAGGAAATAAGAGAGAAAAGAA<br>G      | TTTTTTTTTTTTTTTTTTTTTTTTTTTTT<br>TTTTTTTTTTTTTTTTTTTTTTTTTTTTT<br>TTTTTTTTTTTTTTTTTTTTTTTTTTTTT<br>TTTTTTTTTTTTTTTTTTTTTTTTTTTTT<br>TTTTTTTTTTTTTTTTTTTTTTTTTTTTT<br>TTTTCTTCTACTCAGGCTTTATTCAA<br>AGACCA | Generate linear PCR product for IVT                    |
| NR-Site3-OT1 genomic site                    | ACACTCTTTCCCTACACGACGCTCTT<br>CCGATCTNNNNCGAAATAGGCCCTCT<br>GTCCC  | TGGAGTTCAGACGTGTGCTCTTCCG<br>ATCTGCTTCTGGAAGATGCCATG                                                                                                                                                      |                                                        |
| NR-Site3-OT2 genomic site                    | ACACTCTTTCCCTACACGACGCTCTT<br>CCGATCTNNNNCACTCTGATAATGGG<br>GGAGGC | TGGAGTTCAGACGTGTGCTCTTCCG<br>ATCTTCAGCTGCCCTAAGATGTCTG                                                                                                                                                    |                                                        |
| NR-Site3-OT3 genomic site                    | ACACTCTTTCCCTACACGACGCTCTT<br>CCGATCTNNNNCTGACCCCTGACTTG<br>TTCCC  | TGGAGTTCAGACGTGTGCTCTTCCG<br>ATCTAAGAGATGCTTGGGCTGTGG                                                                                                                                                     | Also used for C-Site3-OT3, C-Site3-OT4, and S-Site-OT1 |
| C-Site3-OT1 genomic site                     | ACACTCTTTCCCTACACGACGCTCTT<br>CCGATCTNNNNTTCCCCATGGTAGCC<br>TGAGA  | TGGAGTTCAGACGTGTGCTCTTCCG<br>ATCTTTCACGTATCCATCCGTCTATT<br>CA                                                                                                                                             |                                                        |
| C-Site3-OT2 genomic site                     | ACACTCTTTCCCTACACGACGCTCTT<br>CCGATCTNNNNTTACAAAGCCAGGT<br>GCAGT   | TGGAGTTCAGACGTGTGCTCTTCCG<br>ATCTAGGCAGCCTGATTCCCAATG                                                                                                                                                     |                                                        |
| S-Site3-OT2 genomic site                     | ACACTCTTTCCCTACACGACGCTCTT<br>CCGATCTNNNNCTCTGTGTCTCCAGT<br>GCCTG  | TGGAGTTCAGACGTGTGCTCTTCCG<br>ATCTCCTCCCTGAACACTGGTGAC                                                                                                                                                     |                                                        |
| S-Site3-OT3 genomic site                     | ACACTCTTTCCCTACACGACGCTCTT<br>CCGATCTNNNNTTGCTGTGTGTGCAT<br>GCAC   | TGGAGTTCAGACGTGTGCTCTTCCG<br>ATCTGTGAAAAGCTGGGGAGGGAA                                                                                                                                                     | Also used for HF-Site3-OT1                             |
| S-Site3-OT4 genomic site                     | ACACTCTTTCCCTACACGACGCTCTT<br>CCGATCTNNNNAGGTTGGCTTTAGAT<br>CCCTGA | TGGAGTTCAGACGTGTGCTCTTCCG<br>ATCTTAACTCCCAAATGCACTGCCT                                                                                                                                                    |                                                        |
| S-Site3-OT5 genomic site                     | ACACTCTTTCCCTACACGACGCTCTT<br>CCGATCTNNNNATCCCTGCTCCTGCT<br>CATCT  | TGGAGTTCAGACGTGTGCTCTTCCG<br>ATCTTGCCCGTAGTAATCCCAGCT                                                                                                                                                     |                                                        |
| HF-Site3-OT2 genomic site                    | ACACTCTTTCCCTACACGACGCTCTT<br>CCGATCTNNNNAATGGCCAAGACCG<br>CAAGAA  | TGGAGTTCAGACGTGTGCTCTTCCG<br>ATCTGGTGCTCTGTCTATCCCCATC                                                                                                                                                    |                                                        |
| HF-Site3-OT3 genomic site                    | ACACTCTTTCCCTACACGACGCTCTT<br>CCGATCTNNNNCCACACCTGATGGCT<br>CACTC  | TGGAGTTCAGACGTGTGCTCTTCCG<br>ATCTGGCTCATTGCATCCTTGACC                                                                                                                                                     |                                                        |
| HF-Site3-OT4 genomic site                    | ACACTCTTTCCCTACACGACGCTCTT<br>CCGATCTNNNNCCTTGGCTTGTGGAC<br>CAGTA  | TGGAGTTCAGACGTGTGCTCTTCCG<br>ATCT<br>GGTAGGCTGAATAATGGCCCC                                                                                                                                                |                                                        |
| HF-Site3-OT5 genomic site                    | ACACTCTTTCCCTACACGACGCTCTT<br>CCGATCTNNNNCGACATCCTGGGTCA<br>TTGCT  | TGGAGTTCAGACGTGTGCTCTTCCG<br>ATCT<br>CTCTCTGACTGGGCTGCTTT                                                                                                                                                 |                                                        |
| NR-Site4-OT1 genomic site                    | ACACTCTTTCCCTACACGACGCTCTT<br>CCGATCTNNNNGGGTGGATCATGAG<br>GTCAGG  | TGGAGTTCAGACGTGTGCTCTTCCG<br>ATCTGATGCTCAGTCTGTACCCA                                                                                                                                                      |                                                        |

|                           |                                                                        |                                                              |                                           |
|---------------------------|------------------------------------------------------------------------|--------------------------------------------------------------|-------------------------------------------|
| NR-Site4-OT2 genomic site | ACACTCTTTCCCTACACGACGCTCTT<br>CCGATCTNNNNAAGCACAGAGATAAA<br>AGGACAGA   | TGGAGTTCAGACGTGTGCTCTTCCG<br>ATCTTCCCTCTGGCTTCTTTAAGTT<br>TT |                                           |
| NR-Site4-OT3 genomic site | ACACTCTTTCCCTACACGACGCTCTT<br>CCGATCTNNNNAGCACAGAGATAAAA<br>GGACAGAA   | TGGAGTTCAGACGTGTGCTCTTCCG<br>ATCTTCCCTCTGGCTTCTTTAAGTT<br>T  |                                           |
| NR-Site4-OT4 genomic site | ACACTCTTTCCCTACACGACGCTCTT<br>CCGATCTNNNNCCGGAGGTCTCTACT<br>TCCCA      | TGGAGTTCAGACGTGTGCTCTTCCG<br>ATCTAGGGCCGCCATACCATATTG        | Also used for C-Site4-OT2 and C-Site4-OT4 |
| C-Site4-OT1 genomic site  | ACACTCTTTCCCTACACGACGCTCTT<br>CCGATCTNNNNCAACAAATGATGCTG<br>GCCGC      | TGGAGTTCAGACGTGTGCTCTTCCG<br>ATCTTTGTTTGGAGAGGGGAGTGC        |                                           |
| C-Site4-OT3 genomic site  | ACACTCTTTCCCTACACGACGCTCTT<br>CCGATCTNNNNNTCCAATATGGTATGG<br>CGGCC     | TGGAGTTCAGACGTGTGCTCTTCCG<br>ATCTGAGGATCCCACGTTAGTGCC        |                                           |
| S-Site4-OT1 genomic site  | ACACTCTTTCCCTACACGACGCTCTT<br>CCGATCTNNNNNTGCTCATGGGATAGT<br>GCTGA     | TGGAGTTCAGACGTGTGCTCTTCCG<br>ATCTTTTCTCTGCCAGCCCTAGGA        | Also used for HF-Site4-OT1                |
| S-Site4-OT2 genomic site  | ACACTCTTTCCCTACACGACGCTCTT<br>CCGATCTNNNNAGGCAGGAGAGTAA<br>CTGGTCT     | TGGAGTTCAGACGTGTGCTCTTCCG<br>ATCTTCCCCTTACACAACACACCTG       |                                           |
| S-Site4-OT3 genomic site  | ACACTCTTTCCCTACACGACGCTCTT<br>CCGATCTNNNNCCGAGCCCTTAGCG<br>CTAAT       | TGGAGTTCAGACGTGTGCTCTTCCG<br>ATCTTTTGC GGCCCAAATCTCCTT       |                                           |
| S-Site4-OT4 genomic site  | ACACTCTTTCCCTACACGACGCTCTT<br>CCGATCTNNNNNTCTCTGGGATCCTCA<br>GCCTG     | TGGAGTTCAGACGTGTGCTCTTCCG<br>ATCTCCATGTTCTCGCCAAAGCTG        |                                           |
| NR-Site5-OT1 genomic site | ACACTCTTTCCCTACACGACGCTCTT<br>CCGATCTNNNNCCACCCAGAACCATC<br>TCCCT      | TGGAGTTCAGACGTGTGCTCTTCCG<br>ATCTCACTGTGGCTGGGAATCCTT        |                                           |
| NR-Site5-OT2 genomic site | ACACTCTTTCCCTACACGACGCTCTT<br>CCGATCTNNNNNTGAGAACAAGCTCAG<br>CCCAG     | TGGAGTTCAGACGTGTGCTCTTCCG<br>ATCTACTCCGTAGCATGGCTGTTT        |                                           |
| C-Site5-OT1 genomic site  | ACACTCTTTCCCTACACGACGCTCTT<br>CCGATCTNNNNGGTGACTCCATTGCC<br>AAGGA      | TGGAGTTCAGACGTGTGCTCTTCCG<br>ATCTTACTCCTCAGGCACTCACCA        |                                           |
| C-Site5-OT2 genomic site  | ACACTCTTTCCCTACACGACGCTCTT<br>CCGATCTNNNNACCATGCTTGTGGAC<br>CACA       | TGGAGTTCAGACGTGTGCTCTTCCG<br>ATCTCCCATGCCATTCTGCCTAT         |                                           |
| C-Site5-OT3 genomic site  | ACACTCTTTCCCTACACGACGCTCTT<br>CCGATCTNNNNCCCCACAGGCACCTT<br>TTGA       | TGGAGTTCAGACGTGTGCTCTTCCG<br>ATCTGACAATTGCGTGCCACGTG         |                                           |
| C-Site5-OT4 genomic site  | ACACTCTTTCCCTACACGACGCTCTT<br>CCGATCTNNNNACAGAATATCCACT<br>GTTGATGAAAA | TGGAGTTCAGACGTGTGCTCTTCCG<br>ATCTGACACTTTGCTTGCTTCTGTGT      |                                           |
| S-Site5-OT1 genomic site  | ACACTCTTTCCCTACACGACGCTCTT<br>CCGATCTNNNNGACCCAACCTGAGAC<br>CAGTG      | TGGAGTTCAGACGTGTGCTCTTCCG<br>ATCTACAGAGGCTAGCCAGTACCT        |                                           |
| S-Site5-OT2 genomic site  | ACACTCTTTCCCTACACGACGCTCTT<br>CCGATCTNNNNGAGGCCTGTTGCAG<br>AGTAGA      | TGGAGTTCAGACGTGTGCTCTTCCG<br>ATCTTGTTTGGGGAAGGAAGGCTT        |                                           |
| S-Site5-OT3 genomic site  | ACACTCTTTCCCTACACGACGCTCTT<br>CCGATCTNNNNCCAACCTCCGAGCTCC<br>TTCTC     | TGGAGTTCAGACGTGTGCTCTTCCG<br>ATCTTGTAGGCTGACAATGGCTGG        |                                           |
| S-Site5-OT4 genomic site  | ACACTCTTTCCCTACACGACGCTCTT<br>CCGATCTNNNNGTGAAGCCAAGGTG<br>AGCAGA      | TGGAGTTCAGACGTGTGCTCTTCCG<br>ATCTCAGCCTCAGCAAGACCTCAC        |                                           |
| HF-Site5-OT1              | ACACTCTTTCCCTACACGACGCTCTT<br>CCGATCTNNNNACCTGCTCCACATGG<br>TGAAT      | TGGAGTTCAGACGTGTGCTCTTCCG<br>ATCTTGATCTTGCCTCTTGAGCA         |                                           |
| HF-Site5-OT2              | ACACTCTTTCCCTACACGACGCTCTT<br>CCGATCTNNNNGGTCACTTCTGTGT<br>TTAATGGC    | TGGAGTTCAGACGTGTGCTCTTCCG<br>ATCTATCGGAGCATGAGAGAAGGC        |                                           |
| NR-Site6-OT1              | ACACTCTTTCCCTACACGACGCTCTT<br>CCGATCTNNNNCTGTGAGGCTCAGTT<br>TCTGA      | TGGAGTTCAGACGTGTGCTCTTCCG<br>ATCTTGTCATCTAGTACCCTACAC        |                                           |
| NR-Site6-OT2              | ACACTCTTTCCCTACACGACGCTCTT<br>CCGATCTNNNNGCTGCAGACCTTTGG<br>ACTCA      | TGGAGTTCAGACGTGTGCTCTTCCG<br>ATCTTGCTACTGGGGAAGGGTTTG        | Also used for C-Site6-OT3                 |
| NR-Site6-OT3              | ACACTCTTTCCCTACACGACGCTCTT<br>CCGATCTNNNNGCACGATTGACAGGT<br>CATGG      | TGGAGTTCAGACGTGTGCTCTTCCG<br>ATCTGACTATAAGTGCCTGCCACCA       |                                           |

|                               |                                                                      |                                                                 |                           |
|-------------------------------|----------------------------------------------------------------------|-----------------------------------------------------------------|---------------------------|
| C-Site6-OT1                   | ACACTCTTTCCCTACACGACGCTCTT<br>CCGATCTNNNNCGCACACTCTGTCAA<br>ATGGC    | TGGAGTTCAGACGTGTGCTCTTCCG<br>ATCTTGGGAGCCAGAGAAGGAAAG           |                           |
| C-Site6-OT2                   | ACACTCTTTCCCTACACGACGCTCTT<br>CCGATCTNNNNGGAGGTGCCAGGTT<br>CCTTT     | TGGAGTTCAGACGTGTGCTCTTCCG<br>ATCTACTAGGTGGAGTCCGGATGA           |                           |
| C-Site6-OT4                   | ACACTCTTTCCCTACACGACGCTCTT<br>CCGATCTNNNNGCATTGCGATGGTGC<br>AGTAG    | TGGAGTTCAGACGTGTGCTCTTCCG<br>ATCTTTTCCTTCTGCCACACCCAG           |                           |
| S-Site6-OT1                   | ACACTCTTTCCCTACACGACGCTCTT<br>CCGATCTNNNNAGCTCAAGCAGTAAG<br>TCAGCA   | TGGAGTTCAGACGTGTGCTCTTCCG<br>ATCTAGTTGACAGGGGATTGGCTT           |                           |
| S-Site6-OT2                   | ACACTCTTTCCCTACACGACGCTCTT<br>CCGATCTNNNNTACTAGCAGCAGGAG<br>CCTGT    | TGGAGTTCAGACGTGTGCTCTTCCG<br>ATCTCCAGCCAGATGACTGACACT           |                           |
| S-Site6-OT3                   | ACACTCTTTCCCTACACGACGCTCTT<br>CCGATCTNNNNCAGTAGCTGGGCATC<br>CCTTG    | TGGAGTTCAGACGTGTGCTCTTCCG<br>ATCTTGACCCTTTCTGGCTTCAGAC          |                           |
| S-Site6-OT4                   | ACACTCTTTCCCTACACGACGCTCTT<br>CCGATCTNNNNAAGCGATCCACTCAC<br>CTTGG    | TGGAGTTCAGACGTGTGCTCTTCCG<br>ATCTTCGTGGCCTTCTTTCTTTCCA          |                           |
| S-Site6-OT5                   | ACACTCTTTCCCTACACGACGCTCTT<br>CCGATCTNNNNGGCAAAGGGATGGA<br>TTGGGA    | TGGAGTTCAGACGTGTGCTCTTCCG<br>ATCTTAGCTTTGTGGCATCAGGTGA          |                           |
| HF-Site6-OT1                  | ACACTCTTTCCCTACACGACGCTCTT<br>CCGATCTNNNNCATCATTTGCATGCA<br>GACTTGT  | TGGAGTTCAGACGTGTGCTCTTCCG<br>ATCTTTGTTATGGTCAATTATCAGGA<br>TGGA |                           |
| HBB-NRCH-OT1<br>genomic site  | ACACTCTTTCCCTACACGACGCTCTT<br>CCGATCTNNNNNTGGGCTTGTTGGTA<br>CTTCC    | TGGAGTTCAGACGTGTGCTCTTCCG<br>ATCTACCATTTGGCAAACACCACA           |                           |
| HBB-NRCH-OT2<br>genomic site  | ACACTCTTTCCCTACACGACGCTCTT<br>CCGATCTNNNNAACAGCCCAAGGG<br>ACAGAG     | TGGAGTTCAGACGTGTGCTCTTCCG<br>ATCTAGCATAAAAGGCAGGGCAGA           | Also used for HBB-Nme-OT1 |
| HBB-NRCH-OT3<br>genomic site  | ACACTCTTTCCCTACACGACGCTCTT<br>CCGATCTNNNNCACTTAGGATGGAGG<br>CACGG    | TGGAGTTCAGACGTGTGCTCTTCCG<br>ATCTCATCTCTCATCCACTGCC             | Also used for HBB-Nme-OT5 |
| HBB-NRCH-OT4<br>genomic site  | ACACTCTTTCCCTACACGACGCTCTT<br>CCGATCTNNNNGGTAGGCAGGGGGT<br>TCAATT    | TGGAGTTCAGACGTGTGCTCTTCCG<br>ATCTAGCCAAGTGGTTGTGAGGAG           |                           |
| HBB-NRCH-OT5<br>genomic site  | ACACTCTTTCCCTACACGACGCTCTT<br>CCGATCTNNNNCTGTTGCCACAGGGA<br>AGTGA    | TGGAGTTCAGACGTGTGCTCTTCCG<br>ATCTTGTTGGCACCTGTAGTCCCA           |                           |
| HBB-NRCH-OT6<br>genomic site  | ACACTCTTTCCCTACACGACGCTCTT<br>CCGATCTNNNNAGCCACATCTTGCTC<br>TTGCT    | TGGAGTTCAGACGTGTGCTCTTCCG<br>ATCTCAGTCTCCTAAGGTGCTGGG           |                           |
| HBB-NRCH-OT7<br>genomic site  | ACACTCTTTCCCTACACGACGCTCTT<br>CCGATCTNNNNGTCCCCACTCTGTTG<br>GAAGG    | TGGAGTTCAGACGTGTGCTCTTCCG<br>ATCTGAGCACCCCACTCCAGAAAA           |                           |
| HBB-NRCH-OT8<br>genomic site  | ACACTCTTTCCCTACACGACGCTCTT<br>CCGATCTNNNNAGGGACTGAAGCCA<br>CCTTTT    | TGGAGTTCAGACGTGTGCTCTTCCG<br>ATCTCAGGAGTCACGTGTCAAGGT           |                           |
| HBB-NRCH-OT9<br>genomic site  | ACACTCTTTCCCTACACGACGCTCTT<br>CCGATCTNNNNTGCCCTCTTTGAGCC<br>ATTTGA   | TGGAGTTCAGACGTGTGCTCTTCCG<br>ATCTGCATGGTGAGTTAAGGGCC            |                           |
| HBB-NRCH-OT10<br>genomic site | ACACTCTTTCCCTACACGACGCTCTT<br>CCGATCTNNNNACAGGTATGAGCCAC<br>TGTGC    | TGGAGTTCAGACGTGTGCTCTTCCG<br>ATCTGCAAGAAAGGGCATGGTGTG           | Also used for HBB-Nme-OT8 |
| HBB-NRCH-OT11<br>genomic site | ACACTCTTTCCCTACACGACGCTCTT<br>CCGATCTNNNNAACCAGTAAGTCAGG<br>CCTGC    | TGGAGTTCAGACGTGTGCTCTTCCG<br>ATCTTTGGGCCACAAGGTCTTTCA           | Also used for HBB-Nme-OT9 |
| HBB-Nme-OT2<br>genomic site   | ACACTCTTTCCCTACACGACGCTCTT<br>CCGATCTNNNNTTGCAATGGAACCAT<br>CTTTCTGG | TGGAGTTCAGACGTGTGCTCTTCCG<br>ATCTTGATGGTTCACATGGCACT            |                           |
| HBB-Nme-OT3<br>genomic site   | ACACTCTTTCCCTACACGACGCTCTT<br>CCGATCTNNNNGGTTGTGAGGTAGG<br>GTTGGG    | TGGAGTTCAGACGTGTGCTCTTCCG<br>ATCTTGTTGTATGGGTGCTGCTGT           |                           |
| HBB-Nme-OT4<br>genomic site   | ACACTCTTTCCCTACACGACGCTCTT<br>CCGATCTNNNNATCTGAGGTGCCTTG<br>AGGAC    | TGGAGTTCAGACGTGTGCTCTTCCG<br>ATCTGCTGAGCGGAGGAGTAATT            |                           |
| HBB-Nme-OT6<br>genomic site   | ACACTCTTTCCCTACACGACGCTCTT<br>CCGATCTNNNNATGTCTGTCTGGAAG<br>GGAGC    | TGGAGTTCAGACGTGTGCTCTTCCG<br>ATCTCACTGACCCTGAGCCTGTAC           |                           |

|                          |                                                                    |                                                               |  |
|--------------------------|--------------------------------------------------------------------|---------------------------------------------------------------|--|
| HBB-Nme-OT7 genomic site | ACACTCTTCCCTACACGACGCTCTT<br>CCGATCTNNNNACGCACTCCTCTTTC<br>TCTCAC  | TGGAGTTCAGACGTGTGCTCTTCCG<br>ATCTCAAACAAAAGGGAGCCAGGC         |  |
| Site 7-OT1 genomic site  | ACACTCTTCCCTACACGACGCTCTT<br>CCGATCTNNNNCGCAGTGGAGGAGT<br>TGGAAA   | TGGAGTTCAGACGTGTGCTCTTCCG<br>ATCTGCCACCTGCGTGAAAATGTT         |  |
| Site 7-OT2 genomic site  | ACACTCTTCCCTACACGACGCTCTT<br>CCGATCTNNNNCTGGGGATTGCCTGA<br>GGAAG   | TGGAGTTCAGACGTGTGCTCTTCCG<br>ATCTCCAAGTCAGACTCACGGGA          |  |
| Site 7-OT3 genomic site  | ACACTCTTCCCTACACGACGCTCTT<br>CCGATCTNNNNCTTGGCTTGGGTCTG<br>AGTGT   | TGGAGTTCAGACGTGTGCTCTTCCG<br>ATCTGGTCACCCGAGAATGGAGAC         |  |
| Site 7-OT4 genomic site  | ACACTCTTCCCTACACGACGCTCTT<br>CCGATCTNNNNGGAGTTGAATCTGAC<br>CCCCG   | TGGAGTTCAGACGTGTGCTCTTCCG<br>ATCTCTCCACTGTGGGCTTCTCAA         |  |
| Site 7-OT5 genomic site  | ACACTCTTCCCTACACGACGCTCTT<br>CCGATCTNNNNNTGAGGTTGTCACTG<br>GATCCA  | TGGAGTTCAGACGTGTGCTCTTCCG<br>ATCTCAGATGAAGTCAGGGTGAGGC        |  |
| Site 7-OT6 genomic site  | ACACTCTTCCCTACACGACGCTCTT<br>CCGATCTNNNNCTCTGCTCAGTTCCA<br>GTTGC   | TGGAGTTCAGACGTGTGCTCTTCCG<br>ATCTTGGCCTCACTTTGTACACC          |  |
| Site 7-OT7 genomic site  | ACACTCTTCCCTACACGACGCTCTT<br>CCGATCTNNNNAGCTGGAGCCTCATC<br>TTTGG   | TGGAGTTCAGACGTGTGCTCTTCCG<br>ATCTCTTACCACATCCAGCACC           |  |
| Site 7-OT8 genomic site  | ACACTCTTCCCTACACGACGCTCTT<br>CCGATCTNNNNGGCTGGTAGCTTTTG<br>TACTGGA | TGGAGTTCAGACGTGTGCTCTTCCG<br>ATCTCCATATCTGTCCACAAATGAGT<br>CC |  |
| Site 7-OT9 genomic site  | ACACTCTTCCCTACACGACGCTCTT<br>CCGATCTNNNNCAAGGGGAAAAGGC<br>CAGAGG   | TGGAGTTCAGACGTGTGCTCTTCCG<br>ATCTTGACTTTGTGGCCAACTTGC         |  |
| Site 7-OT10 genomic site | ACACTCTTCCCTACACGACGCTCTT<br>CCGATCTNNNNNTAGACAAAGGATGTT<br>GGGGCC | TGGAGTTCAGACGTGTGCTCTTCCG<br>ATCTAGCAGGAGACAGACTCAGCA         |  |
| Site 7-OT11 genomic site | ACACTCTTCCCTACACGACGCTCTT<br>CCGATCTNNNNCCACGACTGGAGCT<br>GAAGAA   | TGGAGTTCAGACGTGTGCTCTTCCG<br>ATCTATTCAAGCCTGCTGGGGTG          |  |
| Site 7-OT12 genomic site | ACACTCTTCCCTACACGACGCTCTT<br>CCGATCTNNNNTTCTTGCCACTTTG<br>GGGAC    | TGGAGTTCAGACGTGTGCTCTTCCG<br>ATCTGGCCCCAAAGAGTTCCTCTC         |  |
| Site 8-OT1 genomic site  | ACACTCTTCCCTACACGACGCTCTT<br>CCGATCTNNNNCCTTCAAGGGACCCA<br>TGAGG   | TGGAGTTCAGACGTGTGCTCTTCCG<br>ATCTAATCATGTGATCCTGGGGC          |  |
| Site 8-OT2 genomic site  | ACACTCTTCCCTACACGACGCTCTT<br>CCGATCTNNNNGCTGGAAGGGCCCA<br>TCTATT   | TGGAGTTCAGACGTGTGCTCTTCCG<br>ATCTTGTAAGGCCAGTGTCCAAAGG        |  |
| Site 8-OT3 genomic site  | ACACTCTTCCCTACACGACGCTCTT<br>CCGATCTNNNNGGGGGACTAAGCAG<br>AGGGAT   | TGGAGTTCAGACGTGTGCTCTTCCG<br>ATCTACAAAGCCCTCCACCCAAA          |  |
| Site 8-OT4 genomic site  | ACACTCTTCCCTACACGACGCTCTT<br>CCGATCTNNNNCTGGGAGAGTGTCC<br>TGTGAGG  | TGGAGTTCAGACGTGTGCTCTTCCG<br>ATCTTTGCTGGAAAAGTGCCTCA          |  |
| Site 8-OT5 genomic site  | ACACTCTTCCCTACACGACGCTCTT<br>CCGATCTNNNNCTGTCACAGAAGAT<br>GCCAG    | TGGAGTTCAGACGTGTGCTCTTCCG<br>ATCTGCTCTGTGAGTGCCTTGCTA         |  |
| Site 8-OT6 genomic site  | ACACTCTTCCCTACACGACGCTCTT<br>CCGATCTNNNNGCATAGCTCAGGGG<br>ATGTGT   | TGGAGTTCAGACGTGTGCTCTTCCG<br>ATCTGAAAGCCTCACACTGCTCCT         |  |
| Site 8-OT7 genomic site  | ACACTCTTCCCTACACGACGCTCTT<br>CCGATCTNNNNAGAGGGAGGGTGT<br>TGCCTT    | TGGAGTTCAGACGTGTGCTCTTCCG<br>ATCTGCCAGGTCTCTGCAGTTTCA         |  |
| Site 8-OT8 genomic site  | ACACTCTTCCCTACACGACGCTCTT<br>CCGATCTNNNNGTAGGGGCTGTAGG<br>GTCTGT   | TGGAGTTCAGACGTGTGCTCTTCCG<br>ATCTTGTGTACTGTGGACCCCT           |  |
| Site 8-OT9 genomic site  | ACACTCTTCCCTACACGACGCTCTT<br>CCGATCTNNNNAGTGGTCTTACCTGA<br>GGCCT   | TGGAGTTCAGACGTGTGCTCTTCCG<br>ATCTACAGGATCCACCATGACACG         |  |
| Site 8-OT10 genomic site | ACACTCTTCCCTACACGACGCTCTT<br>CCGATCTNNNNNTGTGGGAGAAGTGC<br>GAAGTC  | TGGAGTTCAGACGTGTGCTCTTCCG<br>ATCTACAAGGTGCAGAGTCCCTT          |  |
| Site 8-OT11 genomic site | ACACTCTTCCCTACACGACGCTCTT<br>CCGATCTNNNNTTGCACTTGTAGCC<br>ATGGA    | TGGAGTTCAGACGTGTGCTCTTCCG<br>ATCTTCTGTGGATGTCTGTGGGC          |  |

|                             |                                                                     |                                                        |                           |
|-----------------------------|---------------------------------------------------------------------|--------------------------------------------------------|---------------------------|
| Site 8-OT12<br>genomic site | ACACTCTTTCCCTACACGACGCTCTT<br>CCGATCTNNNNGGGTGGGGAGTTTC<br>AGGAAG   | TGGAGTTCAGACGTGTGCTCTTCCG<br>ATCTTCACCCACACTGGTAGACT   |                           |
| Site 8-OT13<br>genomic site | ACACTCTTTCCCTACACGACGCTCTT<br>CCGATCTNNNNCTAGCTGTGCTTGC<br>CTGCT    | TGGAGTTCAGACGTGTGCTCTTCCG<br>ATCTCTGCTGGTTCTTTTTCGCCC  |                           |
| Site 8-OT14<br>genomic site | ACACTCTTTCCCTACACGACGCTCTT<br>CCGATCTNNNNACCCACTCCCATCA<br>ACACC    | TGGAGTTCAGACGTGTGCTCTTCCG<br>ATCTACTCCGGCAGTGGTAGTACT  |                           |
| Site 8-OT15<br>genomic site | ACACTCTTTCCCTACACGACGCTCTT<br>CCGATCTNNNNACCAGCAGTGCAATC<br>TAGACTT | TGGAGTTCAGACGTGTGCTCTTCCG<br>ATCTAACAAGCCTGTTTGAGGATGC |                           |
| Site 8-OT16<br>genomic site | ACACTCTTTCCCTACACGACGCTCTT<br>CCGATCTNNNNCCACCACCTCCACAT<br>GGATC   | TGGAGTTCAGACGTGTGCTCTTCCG<br>ATCTTGTGAAGCAGAGAGGTCAGC  |                           |
| Site 8-OT17<br>genomic site | ACACTCTTTCCCTACACGACGCTCTT<br>CCGATCTNNNNAGCTTTCCTAGGGAG<br>GGAGG   | TGGAGTTCAGACGTGTGCTCTTCCG<br>ATCTCCCCTTCTAACACCCCTTGC  |                           |
| Site 8-OT18<br>genomic site | ACACTCTTTCCCTACACGACGCTCTT<br>CCGATCTNNNNCTGTCTGCCATTCC<br>CCTAC    | TGGAGTTCAGACGTGTGCTCTTCCG<br>ATCTTCACCCAACCTCAGCGTTTGA |                           |
| Site 8-OT20<br>genomic site | ACACTCTTTCCCTACACGACGCTCTT<br>CCGATCTNNNNTCCCCATTTCACT<br>CTCCC     | TGGAGTTCAGACGTGTGCTCTTCCG<br>ATCTGCCTGGGTGACAAGAGCAA   |                           |
| Site 8-OT21<br>genomic site | ACACTCTTTCCCTACACGACGCTCTT<br>CCGATCTNNNNAGCCTCAGCCCATAC<br>AGAGA   | TGGAGTTCAGACGTGTGCTCTTCCG<br>ATCTCCGATGGCCATCAGGATCAT  | Also used for Site 8-OT22 |
| Site 8-OT23<br>genomic site | ACACTCTTTCCCTACACGACGCTCTT<br>CCGATCTNNNNGCAGTAAAGTGATGC<br>CCCCT   | TGGAGTTCAGACGTGTGCTCTTCCG<br>ATCTAAGTTTCGCTAGGGTGCAGT  |                           |
| Site 8-OT25<br>genomic site | ACACTCTTTCCCTACACGACGCTCTT<br>CCGATCTNNNNGAGGCTGTGTCATG<br>ATGCT    | TGGAGTTCAGACGTGTGCTCTTCCG<br>ATCTCTTTTCAGCTGGGTCAGGG   |                           |
| Site 8-OT27<br>genomic site | ACACTCTTTCCCTACACGACGCTCTT<br>CCGATCTNNNNGATAGTGGTGCTGG<br>CTGAGG   | TGGAGTTCAGACGTGTGCTCTTCCG<br>ATCTTGGGTTCCCATTCACCAAGG  |                           |

**Supplementary Table 9. Chemically-synthesized guide RNAs used for HDFa cells**

| Site/Guide ID* | Protospacer sequence (5'-3') | sgRNA scaffold (5'-3')                                                                                                                           |
|----------------|------------------------------|--------------------------------------------------------------------------------------------------------------------------------------------------|
| ACC-1/Nme1     | CGCAAAGCTGCATCCACCCCCCG      | GTTGTAGCTCCCTTTCTCATTTCGGAAACGAAATGAGAACCGTTGCTA<br>CAATAAGGCCGTCTGAAAAGATGTGCCGCAACGCTCTGCCCTTAAAG<br>CTTCTGCTTTAAGGGGCATCGTTATTTT <sup>^</sup> |
| GCA-1/Nme11    | GGGTCCAAAGCAGGATGACAGGCA     | GTTGTAGCTCCCTTTCTCATTTCGGAAACGAAATGAGAACCGTTGCTA<br>CAATAAGGCCGTCTGAAAAGATGTGCCGCAACGCTCTGCCCTTAAAG<br>CTTCTGCTTTAAGGGGCATCGTTATTTT <sup>^</sup> |
| TCA-1/Nme14    | TGGCTACAGCAACAGGGTGGTGG      | GTTGTAGCTCCCTTTCTCATTTCGGAAACGAAATGAGAACCGTTGCTA<br>CAATAAGGCCGTCTGAAAAGATGTGCCGCAACGCTCTGCCCTTAAAG<br>CTTCTGCTTTAAGGGGCATCGTTATTTT <sup>^</sup> |
| CCG-1/Nme18    | GTCTCCGCTTTAACCCACCTC        | GTTGTAGCTCCCTTTCTCATTTCGGAAACGAAATGAGAACCGTTGCTA<br>CAATAAGGCCGTCTGAAAAGATGTGCCGCAACGCTCTGCCCTTAAAG<br>CTTCTGCTTTAAGGGGCATCGTTATTTT <sup>^</sup> |
| GCG-1/Nme22    | GGTGTGCAGACGGCAGTCACTAG      | GTTGTAGCTCCCTTTCTCATTTCGGAAACGAAATGAGAACCGTTGCTA<br>CAATAAGGCCGTCTGAAAAGATGTGCCGCAACGCTCTGCCCTTAAAG<br>CTTCTGCTTTAAGGGGCATCGTTATTTT <sup>^</sup> |
| GCT-1/Nme29    | GCACAACAGTGGAGGCAAGAGG       | GTTGTAGCTCCCTTTCTCATTTCGGAAACGAAATGAGAACCGTTGCTA<br>CAATAAGGCCGTCTGAAAAGATGTGCCGCAACGCTCTGCCCTTAAAG<br>CTTCTGCTTTAAGGGGCATCGTTATTTT <sup>^</sup> |
| GCT-2/Nme30    | GAAATGGCACACACATCCCTCGT      | GTTGTAGCTCCCTTTCTCATTTCGGAAACGAAATGAGAACCGTTGCTA<br>CAATAAGGCCGTCTGAAAAGATGTGCCGCAACGCTCTGCCCTTAAAG<br>CTTCTGCTTTAAGGGGCATCGTTATTTT <sup>^</sup> |
| ACC-1/SpRY1    | GCTGCATCCACCCCCGAGG          | SpCas9 sgRNA EZ Kit scaffold from Synthego (with 2'-O-Methyl and 3' phosphorothioate bond modifications)                                         |
| GCA-1/SpRY4    | AAGCAGGATGACAGGCAGGG         | SpCas9 sgRNA EZ Kit scaffold from Synthego (with 2'-O-Methyl and 3' phosphorothioate bond modifications)                                         |
| TCA-1/SpRY7    | CAGCAACAGGGTGGTGGACC         | SpCas9 sgRNA EZ Kit scaffold from Synthego (with 2'-O-Methyl and 3' phosphorothioate bond modifications)                                         |
| CCG-1/SpRY9    | GCTTTAACCCACCTCCAG           | SpCas9 sgRNA EZ Kit scaffold from Synthego (with 2'-O-Methyl and 3' phosphorothioate bond modifications)                                         |
| GCG-1/SpRY10   | CAGACGGCAGTCACTAGGGG         | SpCas9 sgRNA EZ Kit scaffold from Synthego (with 2'-O-Methyl and 3' phosphorothioate bond modifications)                                         |
| GCT-1/SpRY12   | CCAGTGGAGGCAAGAGGGCG         | SpCas9 sgRNA EZ Kit scaffold from Synthego (with 2'-O-Methyl and 3' phosphorothioate bond modifications)                                         |
| GCT-2/SpRY13   | GCACACACATCCCTCGTGCA         | SpCas9 sgRNA EZ Kit scaffold from Synthego (with 2'-O-Methyl and 3' phosphorothioate bond modifications)                                         |

\*See Supplementary Table 5 for list of target sites

<sup>^</sup>Nme2Cas9 chemically-synthesized sgRNAs ordered from IDT, including 2'-O-Methyl and 3' phosphorothioate bond modifications, as previously described<sup>10</sup>

### **Supplementary Note 1. ePACE pressure regulation**

As IPP devices are sensitive to changes in pressure at valves and in connected media bottles, we developed an 8-channel pressure regulator that can be used to regulate these pressures through the eVOLVER framework. The device consists of sets of two proportional valves that can limit air flow from a high-pressure source and a vent at atmospheric pressure. By connecting an electronic pressure gauge to the output of this valve configuration, it is possible to implement proportional-integral-derivative (PID) control over the valves in order to set the output pressure to any desired level between the input and atmospheric pressure. We validated the functionality of this device by regulating pressure at 1.5 psi over 24 hours, and compared the performance of our device with that of a fixed, manually set regulator (PARKER-WATTS R25-02A) connected to the benchtop air supply (Supplementary Figure 3). The average pressure with PID control was 1.498 psi with an RMS error of 0.0086 psi, while the fixed regulator had an average pressure of 1.706 psi with an RMS error of 0.2220 psi. Large pressure deviations (>0.5 psi) that can affect the performance of the devices were observed with the fixed regulator, but were successfully eliminated with our automated pressure regulator scheme. We further characterized the effects of pressure changes at various locations in the system in order to optimize performance of the IPP devices for the course of a PACE experiment (Supplementary Figure 3).

### **Supplementary Note 2. ePACE2 recombination and cheating**

During ePACE2, evolving Nme2Cas9 variants on the SP appeared to propagate well in all lagoons on targeted PAMs (each of the eight N<sub>3</sub>YTN PAMs). Phage were sampled from some lagoons, and the insert was amplified via PCR. Following agarose gel electrophoresis, we found that these SP pools appeared to lose the expected Nme2Cas9 insert, as the resulting bands no longer corresponded to the correct insert size (**Supplementary Fig. 8a**). Sanger sequencing of the incorrectly sized band revealed a region of nucleotide homology between the N-terminus of the gIII construct on the AP and gVI in the phage genome (**Supplementary Fig. 8b,c**). This site of homology was likely acting as a recombination site enabling some phage to incorporate the gIII-C half into the SP genome. As gIII-N is constitutively expressed in the original SAC-PACE selection, this enables phage to propagate in a selection genomic site manner. For subsequent evolutions, we altered the codon usage of the N-terminus of gIII within the AP, such that the nucleotide homology was no



longer present (pTPH412, **Supplementary Table 7**). Following this alteration, recombination was no longer observed.

### **Supplementary Note 3. Validation of the split base editor SAC-PACE selection**

To enable control over the expression of active enzyme in the SAC-PACE selection, we split Nme2ABE8e at the linker sequence between TadABE8e and Nme2Cas9. The TadABE8e-half was linked to the N-terminal half of the gp41-8 intein (gp41-8N), and this entire construct (TadABE8e-gp41-8N) was placed on a complementary plasmid (CP) under the control of a *psp*-promoter and a user-defined ribosome binding sequence. The C-terminal half of the base editor (dNme2Cas9) was linked to the C-terminal half of the gp41-8 intein (gp41-8C), and this construct (gp41-8C-dNme2Cas9) was re-cloned into the SP architecture (SP404, **Supplementary Table 7**). The split SAC-PACE selection was then validated by overnight propagation using new split-SP and host cells containing both AP and CP.

While testing the split SAC-PACE selection, we wanted to select a TadA variant with the highest *Cas-dependent* activity to limit bottlenecking the selection at the deamination step. In addition to TadABE8e, we tested the TadABE8e-R26G point mutant that had converged in prior evolutions (**Supplementary Fig. 6a, 10a**). TadABE8e-R26G enabled 10- to 20 genomic siteold stronger propagation compared to wild-type TadABE8e in a *Cas*-dependent manner, with no propagation in host-cells lacking Nme2Cas9. Moving forward, we chose to use TadABE8e-R26G in split base editor SAC-PACE selections (split SAC-PACE).

### **Supplementary Note 4. PAM-specific activity of ePACE4 evolved variants observed in ABE-PPA.**

Activity improvements of ePACE4 variants on specific PAMs appeared to be agnostic of the PAM targeted during evolution, with most variants preferring  $N_4\underline{CA} > N_4\underline{CC} > N_4\underline{CT} > N_4\underline{CG}$ . The exceptions were variants evolved on the  $N_3\underline{TCG}$  PAM, which exhibited  $N_4\underline{CG}$  activity comparable to or better than activity on the other three  $N_4\underline{CD}$  PAMs. This result would suggest that binding of the position 6 G is distinct from binding to the other three nucleobases. In line with this hypothesis, the mutation profiles in the PID are relatively conserved between variants evolved on the  $N_3\underline{TCA}$  and  $N_3\underline{TCT}$  APs (S933R, R1033S/G, Q1047R); however, additional mutations outside of the three seen in those variants converged in the  $N_3\underline{TCG}$  trajectory (D873V, E932K, D961G, N1031D/S, K1044R, E1045A, K1077E) (**Extended Data Fig. 3c**). We note, however, that the difference in activity between

the variants was nuanced, as the overall trend reflects general improvements to activity on all N<sub>4</sub>CN PAMs (**Extended Data Fig. 3b**).

#### **Supplementary Note 5. Reversion analysis of eNme2-C RuvC/HNH domain mutations.**

Simple reversion of the RuvC-inactivating mutation D16A in eNme2-C did not yield a robust nuclease Cas9. Upon reversion of the eight mutations in the RuvC/HNH domains and their associated linker regions to their wild-type residues, the resulting variant eNme2-C.NR had robust nuclease activity across N<sub>4</sub>CN PAM sites. However, reversion of these mutations had a detrimental effect on base editing activity, as the ABE8e version of eNme2-C.NR had a 1.8 genomic siteold reduction in adenine base editing activity relative to eNme2-C-ABE8e (**Extended Data Fig. 7e**). These results would suggest that some or all the mutations in the RuvC/HNH domains are important for Nme2Cas9 activities necessary for base editing, but detrimental to the subsequent activation or catalytic activity of Nme2Cas9 nuclease.

To further explore this idea and to potentially find an optimal dual base editor/nuclease variant, we generated the set of eight single-point reversion variants of mutations in the RuvC/HNH domains of eNme2-C and evaluated them as nucleases and ABEs (**Extended Data Fig. 7e,f**). Only two of the eight single-point reversion variants, eNme2-C V696F and eNme2-C R711G, showed significant rescue of nuclease activity (12.5- and 4.4 genomic siteold improvement over eNme2-C, respectively). Conversely, most of the reversions reduced ABE efficiency relative to eNme2-C-ABE8e. Notably, none of the eight variants outperformed eNme2-C as an ABE or eNme2-C.NR as a nuclease, highlighting the importance of the amino acid identities at these RuvC/HNH positions in differentiating between base editor and nuclease activities of evolved Nme2Cas9.

#### **Supplementary Note 6. Analysis and limitations of BE-PPA for evaluating Nme2Cas9 PAM compatibility.**

All Nme2Cas9 variants (wild-type and evolved) were profiled using ABE-PPA on a single protospacer ("ABE-PPA", see **Supplementary Table 5**) flanked by 512 unique PAMs (pTPH424, see **Supplementary Tables 1 and 7**). The 512 unique PAMs are only a subset of the theoretical PAM space potentially encompassed by Nme2Cas9 (a six base pair region encompasses 4,096 targetable sequences). We designed the library to observe PAM compatibilities primarily at PAM positions 4-7 (NNNNNNN, 256 combinations), as we hypothesized that the positions that would most likely alter their nucleotide preference during

evolution are the positions canonically recognized by the wild-type enzyme (PAM positions 5 and 6,  $\pm 1$  base). We also included two groups of sequences at PAM positions 1-3 (ACGNNNN or CATNNNN), giving the total 512 PAM sequences, although these positions were pooled during analysis. We limited the library size to 512 members for throughput purposes, as this number allows for profiling of up to 8 variants on an Illumina MiSeq kit (15 m reads, 1.9 m reads per variant, ~4,000 reads per PAM assuming equal distribution). We note that by limiting the analysis to these positions, it is possible that the PAM compatibility observed is biased by the identity of the bases chosen for positions 1-3, the selected protospacer, or the target adenine position. A larger library may be useful for more comprehensive PAM profiling of final variants. Nevertheless, the subset library used in this work provided a rapid, high-throughput method for quickly filtering evolved variants with desired PAM compatibilities and high efficiencies.

To analyze BE-PPA sequenced files, the demultiplexed fastq files were filtered using the seqkit package/grep function<sup>11</sup> to search for two flank sequences near either end of the amplicon. For ABE-PPA profiled variants, groups of PAMs were UMI-tagged, and the specific UMI tag was used in place of one of the flank sequences. Filtered files were then binned into individual fastq files per PAM using the same function. The resulting PAM-specific fastq files were analyzed using standard CRISPResso2<sup>12</sup> analysis.

### **Supplementary Note 7. Design error for the N<sub>4</sub>CN trajectory dual PAM split SAC-PACE APs.**

When designing the dual PAM split SAC-PACE APs (pTPH418b, see **Supplementary Table 5**), the identity of PAM positions 1-3 were set as CTT and AGG for the two target PAMs, both of which fall on the non-coding strand. The TT nucleotides of the CTT-containing PAM occupy codon positions two and three for an arbitrary codon within the AP linker. Notably, when the target PAM is designed to be 3'-CTTACN-5', the 3'-TTA-5' nucleotides introduce an additional stop codon in the PAM (5'-TAA-3' on coding strand), preventing proper correction of the AP. As such, none of the dual PAM split SAC-PACE APs containing an A at PAM position 4 were able to support phage propagation, as observed.

## Supplementary Note 8. Evolved Nme2Cas9 amino acid sequences.

### *eNme2-C:*

MAAFKSNPINYILGLDIGIASVGWAMVEIDEEGNPIRLIDLGVRFERAEVPKTGDSLAMARRL  
ARSVRRLTRRRRAHLLRARRLLKREGVLQAADFDEGLITSLPNTPWQLRAAALDRKLTPL  
WSAVLLHLIKHRGYLSQRKNEGETAAKELGALLKGVANNAHALQTGDFRTPAELALNKFEKE  
SGHIRNQRGDYSHTFSRKDLQAEILLFEKQKEFGNPHVSGGLKEGIETLLMTQRPALSGDA  
VQKMLGHCTLEPTEPKAAKNTYTAERFIWLTKLNNLRILEQGSRPLTDTERSTLMDEPYRK  
SKLYAQARKLLGLEDTAFFKGLRYGKDNAEASTLMEMKAYHAISRALEKEGLKDKKSPLNL  
SSELQDEIGTAFSLFKTDEDITGRLKDRVQPEILEALLKHISFDKVFQISLKALRRIVPLMEQGK  
RYDEACAEIYGVHYGKKNTEEKIYLPPIPADEIRNPVLRALSQARKVINGVRRYGS PARIHI  
ETAREVGKSFKDRKEIAKRQEENRKDREKAAAKFREYFPNFVGEPKSKDILKLRLYEQQHGK  
CLYSGKEINLVRLNEKGYVEIDHALPFSRTWDDSFNNKVLVLGSENQNKGNQTPYEYFNGK  
DNSREWQEFKARVETSRFPSSKKQRILLQKFEDEDFKECNLNDTRYVNRFLCQFVADHILLT  
GKGKRRVVASNGQITNLLRGFWRLRKVRAENDRHHALDAVVACSTVAMQQKITRFVRYKE  
MNAFDGKTVDKETGKVLVYQKTHFPQPWEFFAQEVMIRVFGKPDGKPEFEEADTPEKLRLL  
AEKLSSRPEAVHEYVTPLFVSRAPNRKMSGAHKDTLRSARFVKHNEKISVKRVWLTEIKLA  
DLENMVNYKNGREIELYEALKARLEAYGGNAKQAFDPKDNPFYKKGGLVKAVRVEKTQKS  
GVLLNKKNAYTIADNGDMVRVDVFCKVDKKGKNQYFIVPIYAWQVAENILPDIDCKGYRIDDS  
YTFCFSLHKYDLIAFQKDEKSKVEFAYYINCDSSSGGFYLAWHDKGSREQRFRISTQNLALIQ  
KYQVNELGKEIRPCRLKKRPPVR

### *eNme2-C.NR:*

MAAFKPNPINYILGLDIGIASVGWAMVEIDEEENPIRLIDLGVRFERAEVPKTGDSLAMARRL  
ARSVRRLTRRRRAHLLRARRLLKREGVLQAADFDEGLITSLPNTPWQLRAAALDRKLTPL  
WSAVLLHLIKHRGYLSQRKNEGETAAKELGALLKGVANNAHALQTGDFRTPAELALNKFEKE  
SGHIRNQRGDYSHTFSRKDLQAEILLFEKQKEFGNPHVSGGLKEGIETLLMTQRPALSGDA  
VQKMLGHCTLEPTEPKAAKNTYTAERFIWLTKLNNLRILEQGSRPLTDTERSTLMDEPYRK  
SKLYAQARKLLGLEDTAFFKGLRYGKDNAEASTLMEMKAYHAISRALEKEGLKDKKSPLNL  
SSELQDEIGTAFSLFKTDEDITGRLKDRVQPEILEALLKHISFDKVFQISLKALRRIVPLMEQGK  
RYDEACAEIYGVHYGKKNTEEKIYLPPIPADEIRNPVLRALSQARKVINGVRRYGS PARIHI  
ETAREVGKSFKDRKEIEKRQEENRKDREKAAAKFREYFPNFVGEPKSKDILKLRLYEQQHGK  
CLYSGKEINLVRLNEKGYVEIDHALPFSRTWDDSFNNKVLVLGSENQNKGNQTPYEYFNGK  
DNSREWQEFKARVETSRFPRSKKQRILLQKFEDEDFKECNLNDTRYVNRFLCQFVADHILLT  
GKGKRRVVASNGQITNLLRGFWGLRKVRAENDRHHALDAVVACSTVAMQQKITRFVRYKE  
MNAFDGKTIDKETGKVLHQKTHFPQPWEFFAQEVMIRVFGKPDGKPEFEEADTPEKLRLLA  
EKLSSRPEAVHEYVTPLFVSRAPNRKMSGAHKDTLRSARFVKHNEKISVKRVWLTEIKLAD  
LENMVNYKNGREIELYEALKARLEAYGGNAKQAFDPKDNPFYKKGGLVKAVRVEKTQKSG  
VLLNKKNAYTIADNGDMVRVDVFCKVDKKGKNQYFIVPIYAWQVAENILPDIDCKGYRIDDSY  
TFCFSLHKYDLIAFQKDEKSKVEFAYYINCDSSSGGFYLAWHDKGSREQRFRISTQNLALIQK  
YQVNELGKEIRPCRLKKRPPVR

### *eNme2-T.1:*

MAAFKPNPINYILGLDIGIASVGWAMVEIDEEENPIRLIDLGVRFKRAEVPKTGDSLAMARRL  
ARSMRRLTRRRRAHLLRARRLLKREGVLQAADFDEGLIKSLPNTPWQLRAAALDRKLAPL  
EWSAVLLHLIKHRGYLSQRKNEGETAGKKLGALLKGVANNAHALQTGDFRTPAELALNKFEK  
ESGHIRNQRGDYSHTFSRKDLQAEILLFEKQKEFGNPHVSGGLKEGIETLLMTQRPALSGD

AVQKMLGHCTFEPAPKAAKNTYTAERFIWLTCLNNLRILEQGSERPLTDTERATLMDEPYR  
KSKLTYAQARKLLGLEDTAFFKGLRYGKDNAEASTLMEMKAYHAISRALEKEGLKDKKSPLN  
LSELQDEIGTAFSLFKTDEDIAGRLKDRVQPEILEALLKNISFDKQVQISLKSRRIVPLMEQG  
KRYDEACAEIYGDRYGKKNTEAKIYLPIPADEIRNPVLRALSQTRKVIINGVRRYGGSPARIH  
IETAREVGKSFKDRKEIEKRQEENRKDREKAAAKFREYFPNFVGEPSKSKDILKLRLYEQQHG  
KCLYSGKEINLVRLNEKGYVEIDHALPFSRTWDDSFNNKVLVLGSENQNKGNQTPYEYFNG  
KDNPREWQEFKARVETSRFPRSKKQRILLQKFDEDEGFKECNLNDTRYVSRFLCQFVADHILL  
TGKGRRRVVFASNGQITNLLRGFWGLRKYRAENARHHALDAVVACSTVAMQQKITRFVRYK  
EMNAFDGKTIDKETGKALYQKTRFPQPWEFFAQEVMIRVFGKPDGKPEFEEADTPEKLRLL  
AEKLSRPEAAHEYVTPLFVSRAPNRKMSGAHKATLRSARFVKHNEKVSVKRVLLTEIKLA  
DLENMVNYKNGREIELYEALKARLEAYGGNAKQAFDPKDNPFYKKGGLVKAVRVEKTQES  
GVLLNKNAYTIADNGDRVRVDVFCKVDKKGKNQYFIVPIYAWQVAENILPDIDCKGYRIDDS  
YTFCFSLHRYDLIAFQKDEKSKVEFAYYINCNASNGYFYLAWHDKGSKEQQFSISTQNLVLIQ  
KYQVSELGKEIRPCRLKKRPPVR

*eNme2-T.2:*

MAAFKPNPINYILGLDIGIASVGWAMVEIDEEENPIRLIDLGVRVFKRAEVPKTGDSLAMARKL  
ARSMRRLTRRAHRLLRARLLKREGVLQAADFENGLIKSLPNTPWQLRATALDRKLAPLE  
WSAVLLHLIKHRGYLSQRKNEGETANKKLGALLKGVANNAHALQTGDFRTPAELALNKFEKE  
SGHIRNQRGDYSHTFSRKDLQAEILLFEKQKDFGNPHVSGGLKEGIETLLMTQRPALSGDA  
VQKMLGHCTFEPAPKAAKNTYTAERFIWLTCLNNLRILEQGSERPLTDTERATLMDEPYRK  
SKLTYAQARKLLGLEDTAFFKGLRYGKDNAEASTLMEMKAYHAISRALEKEGLKDKKSPLNL  
SSELQDEIGTAFSLFKTDEDIAGRLKDRVQPEILEALLKHISFDKQVQISLKSRRIVPLMEQGG  
RYDEACAEIYGDRYGKKNTEKKIYLPIPADEIRNPVLRALSQARKVIINGVRRYGGSPARIHI  
ETAREVGKSFKDRKEIEKRQEENRKDREKAAAKFREYFPNFVGEPSKSKDILKLRLYEQQHGK  
CLYSGKEINLVRLNEKGYVEIDHALPFSRTWDDSFNNKVLVLGSENQNKGNQTPYEYFNGK  
DNSREWQEFKARVETSRFPRSKKQRILLQKFDEDEGFKECNLNDTRYVSRFLCQFVADHILLT  
GKGRRRVVFASNGQITNLLRGFWGLRKYRAENARHHSALDAVVACSTVAMQQKITRFVRYKE  
MNAFDGKTIDKETGKVLHQRTHFPQPWEFFAQEVMIRVFGKPDGKPEFEEADTPEKLRLL  
AEKLSIRPEAVHEYVTPLFVSRAPNRKMSGAHKATLRSARFVKHNEKISVKRVWLTEIKLAD  
LENMVNYKNGREIELYEALKARLEAYGGNAKQAFDPKDNPFYKKGGLVKAVRVEKTQKSG  
VLLNKRNAYTIADNGDRVRVDVFCKVDKKGKNQYFIVPIYAWQVAENILPDIDCKGYRIDDSY  
TFCFSLHRYDLIAFQKDEKSKVEFAYYINCNASNGNFYLAWHDKGSKEQQFCISTQNLVLIQK  
YQVNELGKEIRPCRMKKRPPVR

## Supplementary References

- 1 Wang, T., Badran, A. H., Huang, T. P. & Liu, D. R. Continuous directed evolution of proteins with improved soluble expression. *Nat Chem Biol* **14**, 972-980, doi:10.1038/s41589-018-0121-5 (2018).
- 2 Miller, S. M., Wang, T. & Liu, D. R. Phage-assisted continuous and non-continuous evolution. *Nature protocols* **15**, 4101-4127, doi:10.1038/s41596-020-00410-3 (2020).
- 3 Labun, K. *et al.* CHOPCHOP v3: expanding the CRISPR web toolbox beyond genome editing. *Nucleic Acids Res* **47**, W171-W174, doi:10.1093/nar/gkz365 (2019).
- 4 Newby, G. A. *et al.* Base editing of haematopoietic stem cells rescues sickle cell disease in mice. *Nature* **595**, 295-302, doi:10.1038/s41586-021-03609-w (2021).
- 5 Brissette, J. L., Weiner, L., Ripmaster, T. L. & Model, P. Characterization and sequence of the Escherichia coli stress-induced psp operon. *J Mol Biol* **220**, 35-48, doi:10.1016/0022-2836(91)90379-k (1991).
- 6 Ringquist, S. *et al.* Translation initiation in Escherichia coli: sequences within the ribosome-binding site. *Mol Microbiol* **6**, 1219-1229, doi:10.1111/j.1365-2958.1992.tb01561.x (1992).
- 7 Davis, J. H., Rubin, A. J. & Sauer, R. T. Design, construction and characterization of a set of insulated bacterial promoters. *Nucleic Acids Res* **39**, 1131-1141, doi:10.1093/nar/gkq810 (2011).
- 8 Gaudelli, N. M. *et al.* Directed evolution of adenine base editors with increased activity and therapeutic application. *Nature Biotechnology* **38**, 892-900, doi:10.1038/s41587-020-0491-6 (2020).
- 9 Richter, M. F., Zhao, K.T., Eton, E., Lapinaite, A., Newby, G.A., Thuronyi, B.W., Wilson, C., Zeng, J., Bauer, D.E., Doudna, J.A, Liu, D.R. Continuous evolution of an adenine base editor with enhanced Cas domain compatibility and activity. *Nature Biotechnology*, in press (2020).
- 10 Huang, T. P., Newby, G. A. & Liu, D. R. Precision genome editing using cytosine and adenine base editors in mammalian cells. *Nature Protocols* **16**, 1089-1128, doi:10.1038/s41596-020-00450-9 (2021).
- 11 Shen, W., Le, S., Li, Y. & Hu, F. SeqKit: A Cross-Platform and Ultrafast Toolkit for FASTA/Q File Manipulation. *PLOS ONE* **11**, e0163962, doi:10.1371/journal.pone.0163962 (2016).
- 12 Clement, K. *et al.* CRISPResso2 provides accurate and rapid genome editing sequence analysis. *Nature Biotechnology* **37**, 224-226, doi:10.1038/s41587-019-0032-3 (2019).
